# Supplementary material for: Cu(0), O2 and mechanical forces: a saving combination for efficient production of Cu–NHC complexes
Source: Royal Society of Chemistry journal article supplement (doi:10.1039/c6sc03182j), 2016-09-28
Supplement: c6sc03182j1.pdf [file c6sc03182j1.pdf]

# Supporting Information

# Table of contents

|                                                                                                                                  |    |
|----------------------------------------------------------------------------------------------------------------------------------|----|
| 1. Synthetic procedures .....                                                                                                    | 3  |
| 1.1 General remarks .....                                                                                                        | 3  |
| 1.2 General table .....                                                                                                          | 4  |
| 1.2.1 General table for the synthesis of $[\text{CuCl}(\text{NHC})]$ .....                                                       | 5  |
| 1.2.2 General table for the synthesis of $[\text{Cu}(\text{NHC})_2]\text{Y}$ ( $\text{Y} = \text{BF}_4$ or $\text{PF}_6$ ) ..... | 7  |
| 1.3 Imidazolium salts synthesis .....                                                                                            | 9  |
| 1.4 $[\text{CuCl}(\text{NHC})]$ synthesis .....                                                                                  | 18 |
| 1.5 $[\text{Cu}(\text{NHC})_2]\text{Y}$ ( $\text{Y} = \text{BF}_4$ or $\text{PF}_6$ ) synthesis .....                            | 22 |
| 2. Influence of reagent stoichiometry for the production of $[\text{CuCl}(\text{IMes})]$ .....                                   | 27 |
| 2.1 Influence of copper stoichiometry.....                                                                                       | 27 |
| 2.2 Influence of dioxygen stoichiometry .....                                                                                    | 29 |
| 3. X-Ray data .....                                                                                                              | 31 |
| 4. NMR Spectra .....                                                                                                             | 32 |
| 4.1 Imidazolium salts .....                                                                                                      | 32 |
| 4.2 $[\text{CuCl}(\text{NHC})]$ .....                                                                                            | 56 |
| 4.3 $[\text{Cu}(\text{NHC})_2]\text{Y}$ ( $\text{Y} = \text{BF}_4$ or $\text{PF}_6$ ) .....                                      | 63 |
| 5. References .....                                                                                                              | 79 |

# 1. Synthetic procedures

## 1.1 General remarks

All reagents were purchased from Aldrich Chemical Co., Fluka and Alfa Aesar and used without further purification. The milling treatments were carried out either in a Retsch MM200 or MM400 vibrating ball-mill operated at 25 Hz or in a Retsch PM100 Planetary Mill (pbm) operated at 450 rpm. Milling load is defined as the sum of the mass of the reactants per free volume in the bowl.  $^1\text{H}$  NMR spectra were recorded on a Bruker Avance DPX 200 MHz, 300 MHz or 400 MHz spectrometer and are reported in ppm using deuterated solvent for calibration ( $\text{CDCl}_3$  at 7.26 ppm or  $\text{DMSO}-d_6$  at 2.50 ppm). Data are reported as s = singlet, d = doublet, t = triplet, q = quadruplet, qt = quintuplet, sept = septuplet, m = multiplet; coupling constant in Hz; integration.  $^{13}\text{C}$  NMR spectra were recorded on Bruker Avance AM 50 MHz, 75 MHz or 101 MHz spectrometers and are reported in ppm using deuterated solvent for calibration ( $\text{CDCl}_3$  at 77.2 ppm or  $\text{DMSO}-d_6$  at 39.5 ppm). HRMS analysis was performed on a Q-ToF (Waters, ESI, 2001) spectrometer.

## 1.2 General table

Methods utilized for the treatment of reaction mixtures are described hereunder.

Method A: Reaction mixture was recovered with dichloromethane and filtrated over celite. The filtrate was concentrated under vacuum to afford the desired product.

Method B: Reaction mixture was recovered with dichloromethane and filtrated over celite. The filtrate was concentrated under vacuum and the resulting powder was washed three times with water. The resulting powder was dried under vacuum to afford the product.

Method C: Reaction mixture was recovered with dichloromethane and filtrated over celite. The filtrate was concentrated under vacuum and washed with water and diethyl ether and dried under vacuum to afford the product.

Method D: Reaction mixture was recovered with dichloromethane and filtrated over celite. The filtrate was concentrated under vacuum. The solid was washed with diethyl ether, filtrated and dried under vacuum to afford the product.

Method E: Reaction mixture was recovered with dichloromethane and filtrated over celite. The filtrate was concentrated under vacuum and dissolved in a minimum of dichloromethane. Diethyl ether was added to precipitate the product. After filtration, the solid was washed three times with diethyl ether and dried under vacuum to afford the product.

Method F: Reaction mixture was recovered with dichloromethane and filtrated over celite. The filtrate was concentrated under vacuum and washed three times with diethyl ether and dried under vacuum to afford the product.

1.2.1 General table for the synthesis of [CuCl(NHC)]

| Entry | Product       | Reagent       | Aspect<br>bp or mp (°C)                      | Eq.   | Quantity<br>(mmol) | Ball-mill<br>(frequency) | Time | Aspect of<br>reaction<br>mixture | Treatment | Yield <sup>[a]</sup><br>(%) | Product<br>aspect |
|-------|---------------|---------------|----------------------------------------------|-------|--------------------|--------------------------|------|----------------------------------|-----------|-----------------------------|-------------------|
| 1     | [CuCl(IMes)]  | IMes·HCl      | White powder<br>mp: 351 – 352 <sup>[1]</sup> | 1.00  | 0.389              | pbm<br>(450 rpm)         | 5 h  | Brown and<br>compact solid       | Method A  | 85                          | White<br>powder   |
|       |               | Copper powder | Red powder<br><45µm<br>mp: 1083.4            | 2.00  | 0.778              |                          |      |                                  |           |                             |                   |
|       |               | Water         | Transparent liquid                           | 7.14  | 2.778              |                          |      |                                  |           |                             |                   |
| 2     | [CuCl(SIMes)] | SIMes·HCl     | White powder<br>mp: 252 – 254 <sup>[2]</sup> | 1.00  | 0.357              | pbm<br>(450 rpm)         | 5 h  | Brown and<br>compact solid       | Method A  | 76                          | White<br>powder   |
|       |               | Copper powder | Red powder<br><45µm<br>mp: 1083.4            | 2.00  | 0.713              |                          |      |                                  |           |                             |                   |
|       |               | Water         | Transparent liquid                           | 7.78  | 2.778              |                          |      |                                  |           |                             |                   |
| 3     | [CuCl(IPr)]   | IPr·HCl       | White powder<br>260 – 262 <sup>[2]</sup>     | 1.00  | 0.226              | pbm<br>(450 rpm)         | 6 h  | Brown solid                      | Method B  | 82                          | White<br>powder   |
|       |               | Copper powder | Red powder<br><45µm<br>mp: 1083.4            | 5.00  | 1.128              |                          |      |                                  |           |                             |                   |
|       |               | Water         | Transparent liquid                           | 12.30 | 2.778              |                          |      |                                  |           |                             |                   |
| 4     | [CuCl(SIPr)]  | SIPr·HCl      | White solid<br>mp: 220 – 222 <sup>[2]</sup>  | 1.00  | 0.225              | pbm<br>(450 rpm)         | 9 h  | Brown solid                      | Method C  | 65                          | White<br>powder   |
|       |               | Copper powder | Red powder<br><45µm<br>mp: 1083.4            | 5.00  | 1.125              |                          |      |                                  |           |                             |                   |
|       |               | Water         | Transparent liquid                           | 12.35 | 2.778              |                          |      |                                  |           |                             |                   |

|   |                                       |                                   |                                   |      |       |                  |      |                                |          |    |              |
|---|---------------------------------------|-----------------------------------|-----------------------------------|------|-------|------------------|------|--------------------------------|----------|----|--------------|
| 5 | [CuCl(IMes <sup>Me</sup> )]           | IMes <sup>Me</sup> ·HCl           | White solid                       | 1.00 | 0.338 | pbm<br>(450 rpm) | 6 h  | Grey solid                     | Method D | 82 | White powder |
|   |                                       | Copper powder                     | Red powder<br><45µm<br>mp: 1083.4 | 2.00 | 0.676 |                  |      |                                |          |    |              |
|   |                                       | Benzonitrile                      | Transparent liquid                | 0.69 | 0.485 |                  |      |                                |          |    |              |
| 6 | [CuCl(SIMes <sup>Me</sup> )]<br>trans | SIMes <sup>Me</sup> ·HCl<br>trans | White solid                       | 1.00 | 0.336 | pbm<br>(450 rpm) | 6 h  | Brown and<br>compact solid     | Method A | 90 | White powder |
|   |                                       | Copper powder                     | Red powder<br><45µm<br>mp: 1083.4 | 2.00 | 0.673 |                  |      |                                |          |    |              |
|   |                                       | Water                             | Transparent liquid                | 8.27 | 2.778 |                  |      |                                |          |    |              |
| 7 | [CuCl(IPr <sup>Me</sup> )]            | IPr <sup>Me</sup> ·HCl            | White solid                       | 1.00 | 0.217 | pbm<br>(450 rpm) | 12 h | Brown-red and<br>compact solid | Method D | 89 | White powder |
|   |                                       | Copper powder                     | Red powder<br><45µm<br>mp: 1083.4 | 5.00 | 1.087 |                  |      |                                |          |    |              |
|   |                                       | Benzonitrile                      | Transparent liquid                | 2.24 | 0.485 |                  |      |                                |          |    |              |

<sup>[a]</sup> Yield of isolated product; <sup>[b]</sup> Few milligram of reaction mixture were dissolved in deuterated solvent, filtrated and analyzed by <sup>1</sup>H NMR.

1.2.2 General table for the synthesis of [Cu(NHC)<sub>2</sub>]Y (Y = BF<sub>4</sub> or PF<sub>6</sub>)

| Entry | Product                                                | Reagent                              | Aspect<br>bp or mp °C                   | Eq.  | Quantity<br>(mmol) | Ball-Mill<br>(frequency) | Time | Aspect of<br>reaction mixture | Treatment | Yield<br>(%) | Product<br>aspect |
|-------|--------------------------------------------------------|--------------------------------------|-----------------------------------------|------|--------------------|--------------------------|------|-------------------------------|-----------|--------------|-------------------|
| 1     | [Cu(IMes) <sub>2</sub> ]BF <sub>4</sub>                | IMes·HBF <sub>4</sub>                | White solid<br>240 – 243 <sup>[2]</sup> | 1.00 | 0.267              | pbm<br>(450 rpm)         | 3 h  | Red-Brown powder              | Method A  | 79           | White powder      |
|       |                                                        | Copper powder                        | Red powder <45µm<br>mp: 1083.4          | 3.00 | 0.802              |                          |      |                               |           |              |                   |
|       |                                                        | NaOH                                 | Sticky white powder                     | 1.10 | 0.294              |                          |      |                               |           |              |                   |
| 2     | [Cu(IMes) <sub>2</sub> ]PF <sub>6</sub>                | IMes·HPF <sub>6</sub>                | White solid<br>> 300 <sup>[3]</sup>     | 1.00 | 0.245              | pbm<br>(450 rpm)         | 6 h  | Brown powder                  | Method A  | 87           | White powder      |
|       |                                                        | Copper powder                        | Red powder <45µm<br>mp: 1083.4          | 3.00 | 0.734              |                          |      |                               |           |              |                   |
|       |                                                        | NaOH                                 | Sticky white powder                     | 1.10 | 0.269              |                          |      |                               |           |              |                   |
| 3     | [Cu(IPr) <sub>2</sub> ]BF <sub>4</sub>                 | IPr·HBF <sub>4</sub>                 | White solid                             | 1.00 | 0.200              | pbm<br>(450 rpm)         | 6 h  | Brown powder                  | Method F  | 85           | White powder      |
|       |                                                        | Copper powder                        | Red powder <45µm<br>mp: 1083.4          | 5.00 | 1.000              |                          |      |                               |           |              |                   |
|       |                                                        | NaOH                                 | Sticky white powder                     | 1.10 | 0.220              |                          |      |                               |           |              |                   |
| 4     | [Cu(IPr) <sub>2</sub> ]PF <sub>6</sub>                 | IPr·HPF <sub>6</sub>                 | White solid                             | 1.00 | 0.156              | pbm<br>(450 rpm)         | 6 h  | Brown powder                  | Method F  | 89           | White powder      |
|       |                                                        | Copper powder                        | Red powder <45µm<br>mp: 1083.4          | 5.00 | 0.782              |                          |      |                               |           |              |                   |
|       |                                                        | KHMDS                                | White solid                             | 1.10 | 0.172              |                          |      |                               |           |              |                   |
| 5     | [Cu(IMes <sup>Me</sup> ) <sub>2</sub> ]BF <sub>4</sub> | IMes <sup>Me</sup> ·HBF <sub>4</sub> | White solid                             | 1.00 | 0.256              | pbm<br>(450 rpm)         | 6 h  | Brown powder                  | Method A  | 91           | Brown solid       |
|       |                                                        | Copper powder                        | Red powder <45µm<br>mp: 1083.4          | 3.00 | 0.768              |                          |      |                               |           |              |                   |
|       |                                                        | NaOH                                 | Sticky white powder                     | 1.10 | 0.281              |                          |      |                               |           |              |                   |
| 6     | [Cu(IMes <sup>Me</sup> ) <sub>2</sub> ]PF <sub>6</sub> | IMes <sup>Me</sup> ·HPF <sub>6</sub> | White solid                             | 1.00 | 0.235              | pbm<br>(450 rpm)         | 6 h  | Brown powder                  | Method A  | 97           | Brown solid       |
|       |                                                        | Copper powder                        | Red powder <45µm<br>mp: 1083.4          | 3.00 | 0.705              |                          |      |                               |           |              |                   |
|       |                                                        | NaOH                                 | Sticky white powder                     | 1.10 | 0.258              |                          |      |                               |           |              |                   |

|   |                                                       |                                     |                                |      |       |                  |     |              |          |    |              |
|---|-------------------------------------------------------|-------------------------------------|--------------------------------|------|-------|------------------|-----|--------------|----------|----|--------------|
| 7 | [Cu(IPr <sup>Me</sup> ) <sub>2</sub> ]BF <sub>4</sub> | IPr <sup>Me</sup> ·HBF <sub>4</sub> | White solid                    | 1.00 | 0.161 | pbm<br>(450 rpm) | 6 h | Brown powder | Method F | 72 | White powder |
|   |                                                       | Copper powder                       | Red powder <45μm<br>mp: 1083.4 | 5.00 | 0.804 |                  |     |              |          |    |              |
|   |                                                       | KHMDS                               | White solid                    | 1.10 | 0.177 |                  |     |              |          |    |              |
| 8 | [Cu(IPr <sup>Me</sup> ) <sub>2</sub> ]PF <sub>6</sub> | IPr <sup>Me</sup> ·HPF <sub>6</sub> | White solid                    | 1.00 | 0.089 | pbm<br>(450 rpm) | 6h  | Brown powder | Method F | 78 | White powder |
|   |                                                       | Copper powder                       | Red powder <45μm<br>mp: 1083.4 | 5.00 | 0.446 |                  |     |              |          |    |              |
|   |                                                       | KHMDS                               | White solid                    | 5.00 | 0.446 |                  |     |              |          |    |              |



### 1.3 Imidazolium salts synthesis

#### 1,3-Bis-(2,4,6-trimethylphenyl)imidazolium chloride IMes·HCl

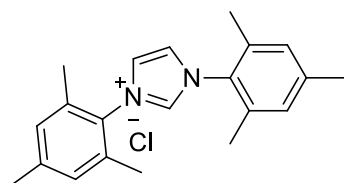

2,4,6-Trimethylaniline (10.4 mL, 74.0 mmol, 2.00 eq) was dissolved in methanol (40 mL). The resulting solution was cooled to 0 °C, and a solution of 40% glyoxal in water (4.23 mL, 37.0 mmol, 1.00 eq) and one or two drops of formic acid were added. The solution was warmed to room temperature and stirred during two days. The yellow suspension was filtrated, washed with a minimum of methanol and diethyl ether to afford *N,N'*-dimesitylethanedimine (8.48 g, 29.0 mmol, 78%) as a yellow powder. <sup>1</sup>H and <sup>13</sup>C NMR spectrum of the product was found to be identical to literature data.<sup>[1]</sup>

Paraformaldehyde (811 mg, 27.0 mmol, 1.00 eq) was suspended in a solution of 4M Hydrochloric acid in dioxane (9.45 mL, 37.8 mmol, 1.40 eq) and stirred until complete dissolution of the white solid. THF (54 mL) followed by *N,N'*-dimesitylethanedimine (7.90 g, 27.0 mmol, 1.00 eq) were added slowly. The resulting solution was stirred at 40°C for 2 days. Then the suspension was cooled to room temperature and the white precipitate was collected by filtration, washed with THF and diethyl ether to afford 1,3-bis-(2,4,6-trimethylphenyl)imidazolium chloride (7.14 g, 20.9 mmol, 78%) as a white powder.

<sup>1</sup>H NMR (300 MHz, CDCl<sub>3</sub>)<sup>[4]</sup> δ 10.95 (s, 1H), 7.60 (s, 2H), 7.04 (s, 4H), 2.35 (s, 6H), 2.19 (s, 12H); <sup>13</sup>C NMR (75 MHz, CDCl<sub>3</sub>) δ 141.4, 140.0, 134.1, 130.6, 129.9, 124.3, 21.1, 17.7

#### 1,3-Bis-(2,4,6-trimethylphenyl)imidazolium tetrafluoroborate IMes·HBF<sub>4</sub>

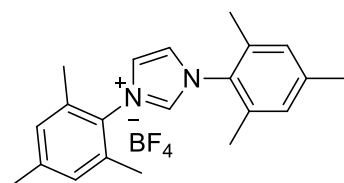

1,3-Bis-(2,4,6-trimethylphenyl)imidazolium chloride (306.8 mg, 0.900 mmol, 1.00 eq) and sodium tetrafluoroborate (163.2 mg, 0.954 mmol, 1.06 eq) were introduced in a 25 mL Teflon grinding bowl with one Teflon ball (10 mm diameter). Total mass of the reagents was calculated so that milling load equals 19.2 mg/mL. The bowl was closed and subjected to grinding for 30 minutes in the vibrating ball-mill operated at 25 Hz. The white powder was recovered with water and the suspension was filtrated. The white solid was washed three times with water and dried under vacuum to afford 1,3-bis-(2,4,6-trimethylphenyl)imidazolium tetrafluoroborate (334.9 mg, 0.854 mmol, 95%) as a white solid.

**<sup>1</sup>H NMR (400 MHz, DMSO-*d*<sub>6</sub>)**<sup>[2]</sup> δ 9.65 (s, 1H), 8.27 (s, 2H), 7.22 (s, 4H), 2.37 (s, 6H), 2.13 (s, 12H); **<sup>13</sup>C NMR (101 MHz, DMSO-*d*<sub>6</sub>)** δ 140.7, 138.5, 134.3, 131.0, 129.4, 124.8, 20.6, 16.9; **<sup>19</sup>F NMR (376 MHz, DMSO-*d*<sub>6</sub>)** δ -148.2

**1,3-Bis-(2,4,6-trimethylphenyl)imidazolium hexafluorophosphate IMes·HPF<sub>6</sub>**

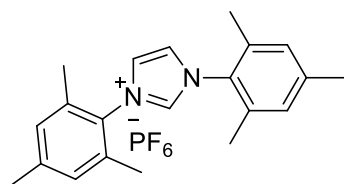

1,3-Bis-(2,4,6-trimethylphenyl)imidazolium chloride (285.2 mg, 0.837 mmol, 1.00 eq) and potassium hexafluorophosphate (184.8 mg, 1.004 mmol, 1.20 eq) were introduced in a 25 mL Teflon grinding bowl with one Teflon ball (10 mm diameter). Total mass of the reagents was calculated so that milling load equals 19.2 mg/mL. The bowl was closed and subjected to grinding for 30 minutes in the vibrating ball-mill operated at 25 Hz. The white powder was recovered with water and the suspension was filtrated. The white solid was washed three times with water and dried under vacuum to afford 1,3-bis-(2,4,6-trimethylphenyl)imidazolium hexafluorophosphate (353.3 mg, 0.784 mmol, 94%) as a white solid.

**<sup>1</sup>H NMR (400 MHz, DMSO-*d*<sub>6</sub>)**<sup>[3]</sup> δ 9.65 (s, 1H), 8.28 (s, 2H), 7.21 (s, 4H), 2.36 (s, 6H), 2.13 (s, 12H); **<sup>13</sup>C NMR (101 MHz, DMSO-*d*<sub>6</sub>)** δ 140.6, 138.5, 134.3, 131.0, 129.4, 124.8, 20.6, 16.8; **<sup>31</sup>P NMR (162 MHz, DMSO-*d*<sub>6</sub>)** δ -144.2 (sept, *J* = 711.2 Hz) ; **<sup>19</sup>F NMR (282 MHz, DMSO-*d*<sub>6</sub>)** δ -70.2 (d, *J* = 711.2 Hz).

**1,3-Bis-(2,6-diisopropylphenyl)imidazolium chloride IPr·HCl**

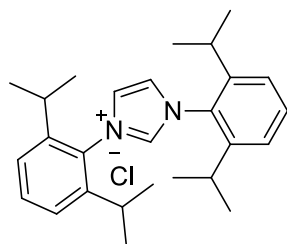

2,6-Diisopropylaniline (3.00 g, 16.9 mmol, 2.00 eq) was dissolved in methanol (16.3 mL). The resulting solution was cooled to 0 °C, and 40% glyoxal in water (975 µL, 8.45 mmol, 1.00 eq) and two or three drops of formic acid were added. The solution was warmed to room temperature and stirred during three days. The yellow suspension was filtrated, washed with a minimum of methanol and diethyl ether to afford *N,N'*-bis(2,6-diisopropylphenyl)ethane-1,2-diimine (2.04 g, 5.42 mmol, 64%) as a yellow powder. <sup>1</sup>H and <sup>13</sup>C NMR spectrum of the product was found to be identical to literature data.<sup>[1]</sup>

Paraformaldehyde (119.5 mg, 3.98 mmol, 1.00 eq) was suspended in as solution of 4M Hydrochloric acid in dioxane (1.40 mL, 5.57 mmol, 1.40 eq) and stirred until complete dissolution of the white solid. THF (30 mL) followed by *N,N'*-bis(2,6-diisopropylphenyl)ethane-1,2-diimine (1.50 g, 3.98 mmol,

1.00 eq) were added slowly. The resulting solution was stirred at 40°C for three days. Then the suspension was cooled to room temperature and the white precipitate was collected by filtration, washed with THF and diethyl ether to afford 1,3-bis-(2,6-diisopropylphenyl)imidazolium chloride (988.1 mg, 2.32 mmol, 58%) as a white powder.

**<sup>1</sup>H NMR (400 MHz, DMSO-*d*<sub>6</sub>)** <sup>[4]</sup> δ 10.27 (s, 1H), 8.59 (s, 2H), 7.69 (t, *J* = 6.8 Hz, 2H), 7.53 (d, *J* = 6.8 Hz, 4H), 2.41 – 2.29 (m, 4H), 1.26 (d, *J* = 5.6 Hz, 12H), 1.16 (d, *J* = 5.6 Hz, 12H); **<sup>13</sup>C NMR (101 MHz, DMSO-*d*<sub>6</sub>)** δ 145.3, 139.8, 132.3, 130.5, 126.7, 125.1, 29.1, 24.6, 23.6.

#### 1,3-Bis-(2,6-diisopropylphenyl)imidazolium tetrafluoroborate IPr·HBF<sub>4</sub>

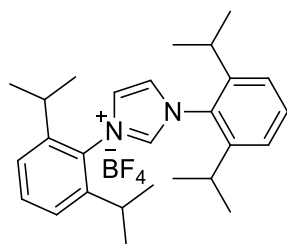

1,3-Bis-(2,6-diisopropylphenyl)imidazolium chloride (368.9 mg, 0.868 mmol, 1.00 eq) and sodium tetrafluoroborate (101.0 mg, 0.920 mmol, 1.06 eq) were introduced in a 25 mL Teflon grinding bowl with one Teflon ball (10 mm diameter). Total mass of the reagents was calculated so that milling load equals 19.2 mg/mL. The bowl was closed and subjected to grinding for 30 minutes in the vibrating ball-mill operated at 25 Hz. The white powder was recovered with water and the suspension was filtrated. The white solid was washed three times with water and dried under vacuum to afford 1,3-bis-(2,6-diisopropylphenyl)imidazolium tetrafluoroborate (398.0 mg, 0.835 mmol, 96%) as a white solid.

**<sup>1</sup>H NMR (400 MHz, DMSO-*d*<sub>6</sub>)** <sup>[5]</sup> δ 10.17 (s, 1H), 8.56 (d, *J* = 1.1 Hz, 2H), 7.69 (t, *J* = 7.8 Hz, 2H), 7.53 (d, *J* = 7.8 Hz, 4H), 2.36 (sept, *J* = 6.7 Hz, 4H), 1.27 (d, *J* = 6.8 Hz, 12H), 1.17 (d, *J* = 6.8 Hz, 12H); **<sup>13</sup>C NMR (101 MHz, DMSO-*d*<sub>6</sub>)** δ 144.8, 139.3, 131.8, 130.0, 126.2, 124.6, 28.6, 24.1, 23.1; **<sup>19</sup>F NMR (376 MHz, DMSO-*d*<sub>6</sub>)** δ -148.3

#### 1,3-Bis-(2,6-diisopropylphenyl)imidazolium hexafluorophosphate IPr·HPF<sub>6</sub>

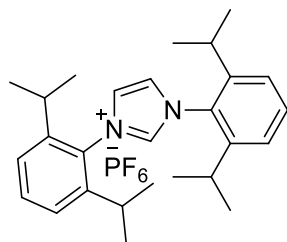

1,3-Bis-(2,6-diisopropylphenyl)imidazolium chloride (308.3 mg, 0.728 mmol, 1.00 eq) and potassium hexafluorophosphate (160.7 mg, 0.873 mmol, 1.20 eq) were introduced in a 25 mL Teflon grinding bowl with one Teflon ball (10 mm diameter). Total mass of the reagents was calculated so that

milling load equals 19.2 mg/mL. The bowl was closed and subjected to grinding for 30 minutes in the vibrating ball-mill operated at 25 Hz. The white powder was recovered with water and the suspension was filtrated. The white solid was washed three times with water and dried under vacuum to afford 1,3-bis-(2,6-diisopropylphenyl)imidazolium hexafluorophosphate (350.3 mg, 0.655 mmol, 90%) as a white solid.

**<sup>1</sup>H NMR (400 MHz, DMSO-*d*<sub>6</sub>)**  $\delta$  10.16 (s, 1H), 8.56 (s, 2H), 7.69 (t, *J* = 7.8 Hz, 2H), 7.54 (d, *J* = 7.8 Hz, 4H), 2.36 (sept, *J* = 6.8 Hz, 4H), 1.27 (d, *J* = 6.8 Hz, 12H), 1.17 (d, *J* = 6.8 Hz, 12H); **<sup>13</sup>C NMR (101 MHz, DMSO-*d*<sub>6</sub>)**  $\delta$  145.3, 139.7, 132.3, 130.5, 126.7, 125.1, 29.1, 24.6, 23.6; **<sup>31</sup>P NMR (162 MHz, DMSO-*d*<sub>6</sub>)**  $\delta$  -144.2 (sept, *J* = 711.2 Hz); **<sup>19</sup>F NMR (376 MHz, DMSO-*d*<sub>6</sub>)**  $\delta$  -70.1 (d, *J* = 711.2 Hz);

### 1,3-Dimesitylimidazolidinium chloride SIMes·HCl

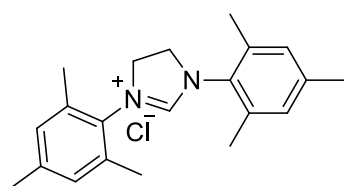

*N,N'*-Dimesitylethanediiimine (4.02 g, 13.7 mmol, 1.00 eq) was dissolved in a mixture of methanol (55 mL) and THF (82 mL). The resulting solution was agitated at room temperature and sodium borohydride (5.20 g, 137.4 mmol, 10.00 eq) was added slowly. After 2 h at room temperature, a saturated solution of ammonium chloride was added. The resulting solution was extracted three times with diethyl ether. The combined organic layer was washed with water, dried with MgSO<sub>4</sub>, filtrated and concentrated under vacuum to furnish 1,2-bis(mesitylamino)ethane (3.78 g, 12.8 mmol, 93%). <sup>1</sup>H and <sup>13</sup>C NMR spectrum of the product was found to be identical to literature data.<sup>[6]</sup>

1,2-Bis(mesitylamino)ethane (3.66 g, 12.40 mmol, 1.00 eq), ammonium chloride (729.6 mg, 13.64 mmol, 1.10 eq) and triethyl orthoformate (5.20 mL, 31.00 mmol, 2.50 eq) were agitated at 110°C for 2 h. The reaction mixture was cooled to room temperature and diethyl ether was added. The resulting suspension was filtrated and the white solid washed with acetone to afford 1,3-dimesitylimidazolidinium chloride (2.81 g, 8.19 mmol, 66%) as a white solid.

**<sup>1</sup>H NMR (400 MHz, CDCl<sub>3</sub>)**<sup>[7]</sup>  $\delta$  9.34 (s, 1H), 6.94 (s, 4H), 4.54 (s, 4H), 2.36 (s, 12H), 2.27 (s, 6H); **<sup>13</sup>C NMR (101 MHz, CDCl<sub>3</sub>)**  $\delta$  159.9, 140.5, 134.9, 130.2, 130.0, 51.9, 21.0, 18.0

### 1,3-Bis(2,6-diisopropylphenyl)imidazolidinium chloride SIPr·HCl

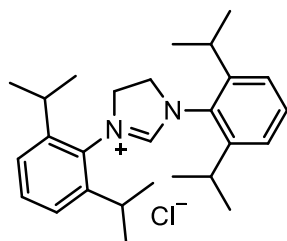

*N,N'*-Bis(2,6-diisopropylphenyl)ethane-1,2-diimine (500 mg, 1.33 mmol, 1.00 eq) was dissolved in a mixture of THF (6 mL) and MeOH (5.3 mL). Sodium borohydride (503.2 mg, 13.3 mmol, 10.00 eq) was added and the mixture was stirred at 80°C for three hours under Argon. The reaction mixture was cooled to room temperature and a saturated aqueous solution of NH<sub>4</sub>Cl was added. Diethyl ether was added and the aqueous phase was extracted three times with diethyl ether. The combined organic layer was washed with water, dried with MgSO<sub>4</sub>, and concentrated under vacuum to afford *N,N'*-bis(2,6-diisopropylphenyl)ethylenediamine (455 mg, 1.20 mmol, 90%). <sup>1</sup>H and <sup>13</sup>C NMR spectrum of the product was found to be identical to literature data.<sup>[2]</sup>

*N,N'*-Bis(2,6-diisopropylphenyl)ethylenediamine (455 mg, 1.20 mmol, 1.00 eq), ammonium chloride (70.6 mg, 1.32 mmol, 1.10 eq) and triethyl orthoformate (795 µL, 4.78 mmol, 4.00 eq) were agitated at 110°C for 4 h. The reaction mixture was cooled to room temperature and diethyl ether was added. The resulting suspension was filtrated and dried under vacuum to afford 1,3-bis(2,6-diisopropylphenyl)imidazolidinium chloride (262.8 mg, 0.615 mmol, 51%) as a white solid.

<sup>1</sup>H NMR (400 MHz, CDCl<sub>3</sub>)<sup>[7]</sup> δ 8.69 (s, 1H), 7.46 (t, *J* = 7.7 Hz, 2H), 7.31 – 7.22 (m, 4H), 4.76 (s, 4H), 2.99 (sept, *J* = 6.6 Hz, 4H), 1.37 (d, *J* = 6.6 Hz, 12H), 1.24 (d, *J* = 6.6 Hz, 12H); <sup>13</sup>C NMR (101 MHz, CDCl<sub>3</sub>) δ 158.7, 146.1, 131.6, 129.4, 125.0, 55.3, 29.3, 25.5, 23.8; HRMS calcd for C<sub>27</sub>H<sub>39</sub>N<sub>2</sub> [M – Cl]<sup>+</sup>: 391.3113; found: 391.3115

#### [1,3-Bis(2,4,6-trimethylphenyl)-4,5-dimethyl]imidazolium chloride IMes<sup>Me</sup>·HCl

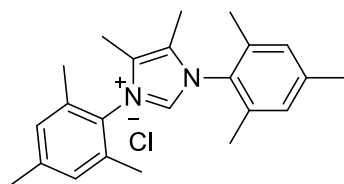

2,4,6-Trimethylaniline (4.15 mL, 29.6 mmol, 2.00 eq) was dissolved in methanol (29.6 mL). The resulting solution was cooled to 0 °C, and 2,3-butanedione (1.29 mL, 14.8 mmol, 1.00 eq) and one or two drops of formic acid were added. The solution was warmed to room temperature and stirred two days. The yellow suspension was filtrated, washed with a minimum of methanol and diethyl ether to afford *N,N'*-dimesityl-2,3-butanediimine (3.20 g, 10.0 mmol, 68%) as a yellow powder. <sup>1</sup>H and <sup>13</sup>C NMR spectrum of the product was found to be identical to literature data.<sup>[8]</sup>

Paraformaldehyde (973 mg, 32.4 mmol, 1.20 eq) was suspended in as solution of 4M Hydrochloric acid in dioxane (9.45 mL, 37.8 mmol, 1.40 eq) and stirred until complete dissolution of the white solid. *N,N'*-dimesityl-2,3-butanediimine (8.646 g, 27.0 mmol, 1.00 eq) dissolved in THF (270 mL) was added slowly. The resulting solution was stirred at room temperature for 3 days. Then the suspension was filtrated, washed with THF and diethyl ether and dried under vaccum. The brown solid was dissolved in a saturated aqueous solution of NaHCO<sub>3</sub>, the aqueous layer was washed four times with ethyl acetate and extracted three times with dichloromethane. The combined organic layer resulting from dichloromethane extraction was dried with MgSO<sub>4</sub> and concentrated under vacuum to afford [1,3-bis(2,4,6-trimethylphenyl)-4,5-dimethyl]imidazolium chloride (751.3 mg, 2.04 mmol, 8%) as a white solid.

**<sup>1</sup>H NMR (400 MHz, CDCl<sub>3</sub>)**<sup>[9]</sup> δ 10.59 (s, 1H), 7.01 (s, 4H), 2.31 (s, 6H), 2.08 (s, 12H), 2.04 (s, 6H); **<sup>13</sup>C NMR (101 MHz, CDCl<sub>3</sub>)** δ 141.2, 137.7, 134.7, 130.0, 128.9, 127.5, 21.2, 17.7, 8.7

**[1,3-Bis(2,4,6-trimethylphenyl)-4,5-dimethyl]imidazolium tetrafluoroborate IMes<sup>Me</sup>·HBF<sub>4</sub>**

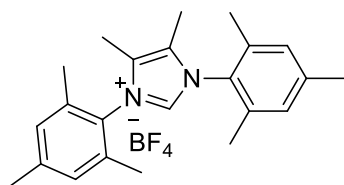

Paraformaldehyde (117.0 mg, 3.90 mmol, 1.25 eq) was suspended in a solution of 4M hydrochloric acid in dioxane (1.21 mL, 4.84 mmol, 1.55 eq) and stirred until complete dissolution of the white solid. This solution was added to a suspension of *N,N'*-dimesityl-2,3-butanediimine (1.00 g, 3.12 mmol, 1.00 eq) in ethyl acetate (12.5 mL). The resulting suspension was stirred 8 h at room temperature. The white solid was recovered by filtration and was dissolved in water (20 mL). Sodium tetrafluoroborate (410.6 mg, 3.74 mmol, 1.2 eq) was added to the solution. After 30 minutes the solid was filtrated and washed three times with water to afford [1,3-bis(2,4,6-trimethylphenyl)-4,5-dimethyl]imidazolium tetrafluoroborate (434.9 mg, 1.03 mmol, 33%) as a brown solid.

**<sup>1</sup>H NMR (400 MHz, DMSO-*d*<sub>6</sub>)**<sup>[10]</sup> δ 9.35 (s, 1H), 7.19 (s, 4H), 2.33 (s, 6H), 2.03 (s, 12H), 2.01 (s, 6H); **<sup>13</sup>C NMR (101 MHz, DMSO-*d*<sub>6</sub>)** δ 141.4, 135.9, 135.2, 130.0, 129.4, 128.5, 21.1, 17.1, 8.4 ; **<sup>19</sup>F NMR (376 MHz, DMSO-*d*<sub>6</sub>)** δ -148.2; **HRMS** calcd for C<sub>23</sub>H<sub>29</sub>N<sub>2</sub> [M – BF<sub>4</sub>]<sup>+</sup>: 333.2330; found: 333.2331

**[1,3-Bis(2,4,6-trimethylphenyl)-4,5-dimethyl]imidazolium hexafluorophosphate IMes<sup>Me</sup>·HPF<sub>6</sub>**

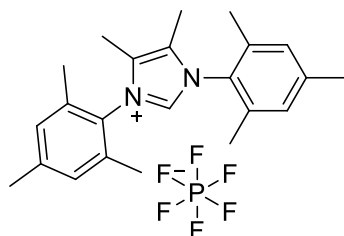

Paraformaldehyde (117.0 mg, 3.90 mmol, 1.25 eq) was suspended in a solution of 4M hydrochloric acid in dioxane (1.21 mL, 4.84 mmol, 1.55 eq) and stirred until complete dissolution of the white solid. This solution was added to a suspension of *N,N'*-dimesityl-2,3-butanediimine (1.00 g, 3.12 mmol, 1.00 eq) in ethyl acetate (12.5 mL). The resulting suspension was stirred during 8 h at room temperature. The white solid was recovered by filtration and dissolved in water (20 mL). Potassium hexafluorophosphate (688.4 mg, 3.74 mmol, 1.2 eq) was added to the solution. After 30 minutes the solid was filtrated and washed three times with water to afford [1,3-bis(2,4,6-trimethylphenyl)-4,5-dimethyl]imidazolium hexafluorophosphate (429.2 mg, 0.897 mmol, 29%) as a beige solid.

**<sup>1</sup>H NMR (400 MHz, DMSO-*d*<sub>6</sub>)** δ 9.35 (s, 1H), 7.19 (s, 4H), 2.33 (s, 6H), 2.09 – 1.95 (m, 18H) ; **<sup>13</sup>C NMR (101 MHz, DMSO-*d*<sub>6</sub>)** δ 141.3, 135.8, 135.2, 129.9, 129.3, 128.4, 21.0, 17.1, 8.4 ; **<sup>31</sup>P NMR (162 MHz,**

**DMSO-*d*<sub>6</sub>**)  $\delta$  -144.26 (sept,  $J$  = 711.3 Hz) ; **<sup>19</sup>F NMR (376 MHz, DMSO-*d*<sub>6</sub>)**  $\delta$  -70.1 (d,  $J$  = 711.5 Hz) ; **HRMS** calcd for C<sub>23</sub>H<sub>29</sub>N<sub>2</sub> [M – PF<sub>6</sub>]<sup>+</sup>: 333.2331; found: 333.2333

**[1,3-Bis(2,6-diisopropylphenyl)-4,5-dimethyl]imidazolium chloride IPr<sup>Me</sup>·HCl**

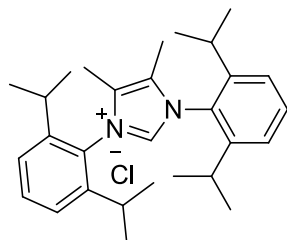

2,6-Diisopropylaniline (15.0 g, 84,6 mmol, 2.00 eq) was dissolved in methanol (42,3 mL). The resulting solution was cooled to 0 °C, and 2,3-butanedione (3.7 mL, 42,3 mmol, 1.00 eq) and one or two drops of formic acid were added. The solution was warmed to room temperature and stirred overnight. The yellow suspension was filtrated, washed with a minimum of methanol and diethyl ether to afford *N,N'*-bis-(2,6-diisopropylphenyl)butane-2,3-diimine (11.15 g, 27.6 mmol, 65%) as a yellow powder. <sup>1</sup>H and <sup>13</sup>C NMR spectrum of the product was found to be identical to literature data.<sup>[10]</sup>

Paraformaldehyde (288.0 mg, 9.59 mmol, 1.25 eq) was suspended in a solution of 4M hydrochloric acid in dioxane (2.89 mL, 11.6 mmol, 1.50) and stirred until complete dissolution of the white solid. The resulting solution was added dropwise to a solution of *N,N'*-bis-(2,6-diisopropylphenyl)butane-2,3-diimine (3.11 g, 7.67 mmol, 1.00 eq) in THF (76.7 mL) at 0°C. The resulting solution was stirred at room temperature overnight. Then the white precipitate was collected by filtration, washed with THF and diethyl ether to afford [1,3-bis(2,6-diisopropylphenyl)-4,5-dimethyl]imidazolium chloride (806.6 mg, 1.78 mmol, 23%) as a white powder.

**<sup>1</sup>H NMR (400 MHz, DMSO-*d*<sub>6</sub>)**<sup>[11]</sup>  $\delta$  9.98 (s, 1H), 7.68 (t,  $J$  = 7.8 Hz, 2H), 7.53 (d,  $J$  = 7.8 Hz, 4H), 2.29 (sept,  $J$  = 6.8 Hz, 4H), 2.06 (s, 6H), 1.25 (d,  $J$  = 6.8 Hz, 12H), 1.11 (d,  $J$  = 6.8 Hz, 12H); **<sup>13</sup>C NMR (101 MHz, DMSO-*d*<sub>6</sub>)**  $\delta$  145.4, 136.8, 132.4, 129.1, 128.0, 125.2, 28.7, 25.0, 22.8, 8.6

**[1,3-Bis(2,6-diisopropylphenyl)-4,5-dimethyl]imidazolium tetrafluoroborate IPr<sup>Me</sup>·HBF<sub>4</sub>**

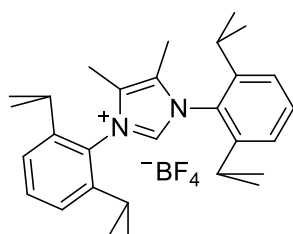

[1,3-Bis(2,6-diisopropylphenyl)-4,5-dimethyl]imidazolium chloride (250 mg, 0.552 mmol, 1.00 eq) was dissolved in water (20 mL) and sodium tetrafluoroborate (72.7 mg, 0.662 mmol, 1.20 eq) was added. The resulting suspension was stirred for 30 minutes and filtrated under vacuum. The solid

was washed with water and diethyl ether and dried under vacuum to afford [1,3-bis(2,6-diisopropylphenyl)-4,5-dimethyl]imidazolium tetrafluoroborate (221.7 mg, 0.439 mmol, 80%) as a white powder.

**<sup>1</sup>H NMR (400 MHz, DMSO-*d*<sub>6</sub>)** δ 9.98 (s, 1H), 7.69 (t, *J* = 7.8 Hz, 2H), 7.55 (d, *J* = 7.8 Hz, 4H), 2.32 (sept, *J* = 6.7 Hz, 4H), 2.09 (s, 6H), 1.27 (d, *J* = 6.7 Hz, 12H), 1.13 (d, *J* = 6.7 Hz, 12H); **<sup>13</sup>C NMR (101 MHz, DMSO-*d*<sub>6</sub>)** δ 145.2, 136.6, 132.1, 128.9, 127.8, 125.0, 28.4, 24.8, 22.6, 8.4; **<sup>19</sup>F NMR (376 MHz, DMSO-*d*<sub>6</sub>)** δ -148.3; **HRMS** calcd for C<sub>29</sub>H<sub>41</sub>N<sub>2</sub> [M – BF<sub>4</sub>]<sup>+</sup>: 417.3270; found: 417.3269

**[1,3-Bis(2,6-diisopropylphenyl)-4,5-dimethyl]imidazolium hexafluorophosphate IPr<sup>Me</sup>·HPF<sub>6</sub>**

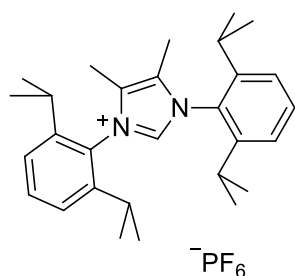

[1,3-Bis(2,6-diisopropylphenyl)-4,5-dimethyl]imidazolium chloride (350 mg, 0.772 mmol, 1.00 eq) was dissolved in water (40 mL) and potassium hexafluorophosphate (170.6 mg, 0.927 mmol, 1.20 eq) was added. The resulting suspension was stirred for 30 minutes and filtrated under vacuum. The solid was washed with water and diethyl ether and dried under vacuum to afford [1,3-bis(2,6-diisopropylphenyl)-4,5-dimethyl]imidazolium hexafluorophosphate (341 mg, 0.606 mmol, 78%) as a white powder.

**<sup>1</sup>H NMR (400 MHz, DMSO-*d*<sub>6</sub>)** δ 9.97 (s, 1H), 7.69 (t, *J* = 7.8 Hz, 2H), 7.54 (d, *J* = 7.8 Hz, 4H), 2.38 – 2.25 (m, 4H), 2.08 (s, 6H), 1.26 (d, *J* = 6.7 Hz, 12H), 1.12 (d, *J* = 6.8 Hz, 12H); **<sup>13</sup>C NMR (101 MHz, DMSO-*d*<sub>6</sub>)** δ 145.3, 136.6, 132.1, 129.0, 127.9, 125.0, 28.5, 24.9, 22.6, 8.5; **<sup>31</sup>P NMR (162 MHz, DMSO-*d*<sub>6</sub>)** δ -144.2 (sept, *J* = 711.2 Hz); **<sup>19</sup>F NMR (376 MHz, DMSO-*d*<sub>6</sub>)** δ -70.2 (d, *J* = 711.2 Hz); **HRMS** calcd for C<sub>29</sub>H<sub>41</sub>N<sub>2</sub> [M – PF<sub>6</sub>]<sup>+</sup>: 417.3270; found: 417.3272

**[1,3-Bis(2,4,6-trimethylphenyl)-4,5-dimethyl]imidazolidinium chloride SIMes<sup>Me</sup>·HCl**

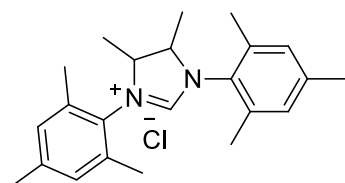

*N,N'*-Dimesityl-2,3-butanediimine (6.00 g, 18.7 mmol, 1.00 eq) was dissolved in methanol (75 mL). Cyanoborohydride (5.90 g, 93.6 mmol, 5.00 eq) was added slowly to the resulting solution. Bromo cresol green and 0.1M HCl aqueous solution was added until the solution changed from blue to yellow. The resulting solution was stirred at reflux for three days. Then, reaction mixture was cooled down to room temperature, 0.1N KOH aqueous solution (15 mL) and water (150 mL) were added.



The aqueous layer was extracted three times with dichloromethane (3\*100 mL). The combined organic layer was washed two times with water, dried with MgSO<sub>4</sub> and concentrated under vacuum. The crude mixture was purified by column chromatography with a gradient ranging from cyclohexane to cyclohexane/ethyl acetate 2% to afford both *cis*-2,3-bis(mesitylamino)butane (581,4 mg, 1.79 mmol, 10%) and *trans*-2,3-bis(mesitylamino)butane (3.26 g, 10.04 mmol, 54%) as white powders.

Cis diastereoisomer:

*Cis*-2,3-bis(mesitylamino)butane (347.0 mg, 1.07 mmol, 1.00 eq), ammonium chloride (57.2 mg, 1.07 mmol, 1.00 eq) and triethyl orthoformate (1.07 mL, 6.41 mmol, 6.00 eq) were stirred at 110°C overnight. Then, reaction mixture was cooled down to room temperature, diethyl ether was added, the white solid was filtrated and washed with diethyl ether and acetone to afford [1,3-bis(2,4,6-trimethylphenyl)-4,5-*cis*-dimethyl]imidazolidinium chloride (202.9 mg, 0.547 mmol, 51%) as a white solid.

**<sup>1</sup>H NMR (400 MHz, CDCl<sub>3</sub>)** δ 9.82 (s, 1H), 6.94 (s, 2H), 6.92 (s, 2H), 5.10 (s, 2H), 2.40 (s, 6H), 2.35 (s, 6H), 2.26 (s, 6H), 1.30 (s, 6H); **<sup>13</sup>C NMR (101 MHz, CDCl<sub>3</sub>)** δ 159.0, 140.2, 135.7, 135.3, 130.4, 130.3, 128.9, 62.3, 21.1, 19.0, 18.6, 12.3; **HRMS** calcd for C<sub>23</sub>H<sub>31</sub>N<sub>2</sub> [M – Cl]<sup>+</sup>: 335.2487; found : 335.2489

Trans diastereoisomer:

*Trans*-2,3-bis(mesitylamino)butane (2.68 g, 8.25 mmol, 1.00 eq), ammonium chloride (441 mg, 8.25 mmol, 1.00 eq) and triethyl orthoformate (8.25 mL, 49.5 mmol, 6.00 eq) were stirred at 110°C overnight. Then, reaction mixture was cooled down to room temperature, diethyl ether was added, the white solid was filtrated and washed with diethyl ether and acetone to afford [1,3-bis(2,4,6-trimethylphenyl)-4,5-*trans*-dimethyl]imidazolidinium chloride (1.19 g, 3.20 mmol, 39%) as a white solid.

**<sup>1</sup>H NMR (400 MHz, CDCl<sub>3</sub>)** δ 10.33 (s, 1H), 6.93 (s, 2H), 6.90 (s, 2H), 4.41 – 4.30 (m, 2H), 2.36 (s, 6H), 2.32 (s, 6H), 2.25 (s, 6H), 1.43 (d, *J* = 6.0 Hz, 6H); **<sup>13</sup>C NMR (101 MHz, CDCl<sub>3</sub>)** δ 160.5, 140.2, 136.2, 134.6, 130.34, 130.31, 128.8, 66.8, 21.0, 19.0, 18.4, 17.8; **HRMS** calcd for C<sub>23</sub>H<sub>31</sub>N<sub>2</sub> [M – Cl]<sup>+</sup>: 335.2488; found : 335.2489

#### 1.4 [CuCl(NHC)] synthesis

##### [1,3-Bis(2,4,6-trimethylphenyl)imidazol-2-ylidene]copper(I) chloride [CuCl(IMes)]

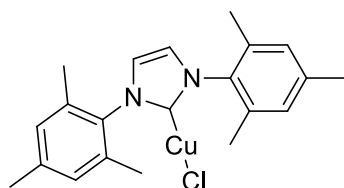

1,3-Bis-(2,4,6-trimethylphenyl)imidazolium chloride (122.1 mg, 0.358 mmol, 1.00 eq), copper powder (45.5 mg, 0.716 mmol, 2.00 eq) and water (50  $\mu$ L) were introduced in a 12 mL stainless steel grinding bowl with fifty stainless steel balls (0.5 cm diameter). Total mass of the reagents was calculated so that milling load equals 19.2 mg/mL. The bowl was closed, placed in the planetary ball-mill and subjected to grinding for 5 hours at 450 rpm. Reaction mixture was recovered with dichloromethane and filtrated over celite. The filtrate was concentrated under vacuum to afford [1,3-bis(2,4,6-trimethylphenyl)imidazol-2-ylidene]copper(I) chloride (123.3 mg, 0.306 mmol, 85%) as a white solid.

$^1\text{H}$  NMR (300 MHz,  $\text{CDCl}_3$ )<sup>[12]</sup>  $\delta$  7.06 (s, 2H), 7.01 (s, 4H), 2.35 (s, 6H), 2.11 (s, 12H);  $^{13}\text{C}$  NMR (75 MHz,  $\text{CDCl}_3$ )  $\delta$  179.5, 139.9, 135.4, 134.9, 129.8, 122.6, 21.4, 18.1

##### [1,3-Bis-(2,6-diisopropylphenyl)imidazol-2-ylidene]copper(I) chloride [CuCl(IPr)]

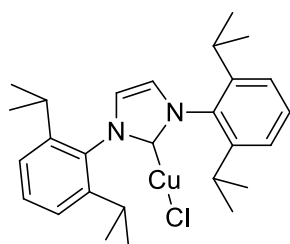

1,3-bis-(2,6-diisopropylphenyl)imidazolium chloride (95.9 mg, 0.226 mmol, 1.00 eq), copper powder (71.7 mg, 1.128 mmol, 5.00 eq) and water (50  $\mu$ L) were introduced in a 12 mL stainless steel grinding bowl with fifty stainless steel balls (0.5 cm diameter). Total mass of the reagents was calculated so that milling load equals 19.2 mg/mL. The bowl was closed, placed in the planetary ball-mill and subjected to grinding for 6 hours at 450 rpm. Reaction mixture was recovered with dichloromethane and filtrated over celite. The filtrate was concentrated under vacuum. The resulting white powder was washed three times with water and dried under vacuum to afford [1,3-bis-(2,6-diisopropylphenyl)imidazol-2-ylidene]copper(I) chloride (90.3 mg, 0.185 mmol, 82%) as a white powder.

$^1\text{H}$  NMR (400 MHz,  $\text{CDCl}_3$ )<sup>[12]</sup>  $\delta$  7.50 (s, 2H), 7.31 (s, 4H), 7.14 (s, 2H), 2.59 (s, 4H), 1.31 (s, 12H), 1.25 (s, 12H);  $^{13}\text{C}$  NMR (101 MHz,  $\text{CDCl}_3$ )  $\delta$  180.7, 145.7, 134.5, 130.7, 124.3, 123.3, 28.9, 24.9, 24.0

**[1,3-Bis(2,4,6-trimethylphenyl)imidazolidin-2-ylidene]copper(I) chloride [CuCl(SIMes)]**

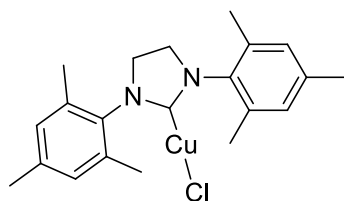

1,3-Dimesitylimidazolidinium chloride (122.3 mg, 0.357 mmol, 1.00 eq), copper powder (45.3 mg, 0.713 mmol, 2.00 eq) and water (50  $\mu$ L) were introduced in a 12 mL stainless steel grinding bowl with fifty stainless steel balls (0.5 cm diameter). Total mass of the reagents was calculated so that milling load equals 19.2 mg/mL. The bowl was closed, placed in the planetary ball-mill and subjected to grinding for 6 hours at 450 rpm. Reaction mixture was recovered with dichloromethane and filtrated over celite. The filtrate was concentrated under vacuum. The resulting white powder was washed with diethyl ether to afford [1,3-bis(2,4,6-trimethylphenyl)imidazolidin-2-ylidene]copper(I) chloride (107 mg, 0.264 mmol, 76%) as a white powder.

$^1\text{H}$  NMR (300 MHz,  $\text{CDCl}_3$ )<sup>[12]</sup>  $\delta$  6.96 (s, 4H), 3.96 (s, 4H), 2.32 (s, 12H), 2.31 (s, 6H) ;  $^{13}\text{C}$  NMR (101 MHz,  $\text{CDCl}_3$ )  $\delta$  138.7, 135.2, 134.9, 129.7, 50.94, 50.85, 20.8, 17.7.

**[1,3-Bis(2,6-diisopropylphenyl)imidazolidin-2-ylidene]copper(I) chloride [CuCl(SIPr)]**

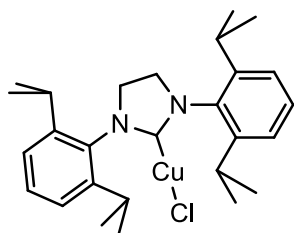

1,3-Bis(2,6-diisopropylphenyl)imidazolidinium chloride (96.1 mg, 0.225 mmol, 1.00 eq), copper powder (71.5 mg, 1.125 mmol, 5.00 eq) and water (50  $\mu$ L) were introduced in a 12 mL stainless steel grinding bowl with fifty stainless steel balls (0.5 cm diameter). Total mass of the reagents was calculated so that milling load equals 19.2 mg/mL. The bowl was closed, placed in the planetary ball-mill and subjected to grinding for 6 hours at 450 rpm. Reaction mixture was recovered with dichloromethane and filtrated over celite. The filtrate was concentrated under vacuum. The resulting white powder was washed with water and diethyl ether to afford [1,3-bis(2,6-diisopropylphenyl)imidazolidin-2-ylidene]copper(I) chloride (71.9 mg, 0.147 mmol, 65%) as a white powder.

$^1\text{H}$  NMR (400 MHz,  $\text{DMSO}-d_6$ )<sup>[13]</sup>  $\delta$  7.46 – 7.39 (m, 2H), 7.33 (d,  $J$  = 7.6 Hz, 4H), 4.07 (s, 4H), 3.10 (sept,  $J$  = 6.8 Hz, 4H), 1.31 (d,  $J$  = 6.8 Hz, 12H), 1.26 (d,  $J$  = 6.8 Hz, 12H) ;  $^{13}\text{C}$  NMR (101 MHz,  $\text{DMSO}-d_6$ )  $\delta$  200.9, 146.5, 134.6, 129.5, 124.3, 53.6, 28.1, 25.2, 23.4.

**[(1,3-Bis(2,4,6-trimethylphenyl)-4,5-dimethyl)imidazol-2-ylidene]copper(I) chloride [CuCl(IMes<sup>Me</sup>)]**

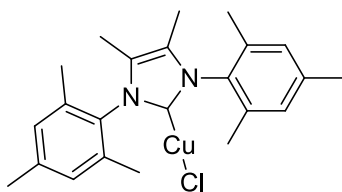

[1,3-Bis(2,4,6-trimethylphenyl)-4,5-dimethyl]imidazolium chloride (124.6 mg, 0.338 mmol, 1.00 eq), copper powder (42.9 mg, 0.676 mmol, 2.00 eq) and benzonitrile (50  $\mu$ L) were introduced in a 12 mL stainless steel grinding bowl with fifty stainless steel balls (0.5 cm diameter). Total mass of the reagents was calculated so that milling load equals 19.2 mg/mL. The bowl was closed, placed in the planetary ball-mill and subjected to grinding for 6 hours at 450 rpm. Reaction mixture was recovered with dichloromethane and filtrated over celite. The filtrate was concentrated under vacuum to afford [(1,3-bis(2,4,6-trimethylphenyl)-4,5-dimethyl)imidazol-2-ylidene]copper(I) chloride (118.9 mg, 0.276 mmol, 82%) as a white powder.

<sup>1</sup>H NMR (400 MHz, CDCl<sub>3</sub>)  $\delta$  6.99 (s, 4H), 2.34 (s, 6H), 2.03 (s, 12H), 1.88 (s, 6H); <sup>13</sup>C NMR (101 MHz, CDCl<sub>3</sub>)  $\delta$  175.4, 139.3, 135.0, 133.8, 129.6, 125.5, 21.2, 17.9, 9.2;

**[(1,3-Bis(2,6-diisopropylphenyl)-4,5-dimethyl)imidazol-2-ylidene]copper(I) chloride [CuCl(IPr<sup>Me</sup>)]**

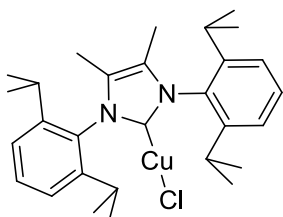

[1,3-Bis(2,6-diisopropylphenyl)-4,5-dimethyl]imidazolium chloride (98.5 mg, 0.217 mmol, 1.00 eq), copper powder (69.1 mg, 1.087 mmol, 5.00) and benzonitrile (50  $\mu$ L) were introduced in a 12 mL stainless steel grinding bowl with fifty stainless steel balls (0.5 cm diameter). Total mass of the reagents was calculated so that milling load equals 19.2 mg/mL. Reaction mixture was recovered with dichloromethane and filtrated over celite. The filtrate was concentrated under vacuum. The resulting white solid was washed with diethyl ether and dried under vacuum to afford [(1,3-bis(2,6-diisopropylphenyl)-4,5-dimethyl)imidazol-2-ylidene]copper(I) chloride (99.4 mg, 0.193 mmol, 89%) as a white powder.

<sup>1</sup>H NMR (400 MHz, DMSO-*d*<sub>6</sub>)<sup>[14]</sup>  $\delta$  7.56 (t, *J* = 7.6 Hz, 2H), 7.42 (d, *J* = 7.6 Hz, 4H), 2.46 – 2.35 (m, 4H), 1.91 (s, 6H), 1.21 (d, *J* = 7.6 Hz, 12H), 1.19 (d, 7.6 Hz, 12H) ; <sup>13</sup>C NMR (101 MHz, DMSO-*d*<sub>6</sub>)  $\delta$  175.3, 145.6, 132.5, 130.5, 126.2, 124.3, 28.2, 25.1, 22.8, 9.0

**[(1,3-Bis-(2,4,6-trimethylphenyl)-4,5-*trans*-dimethyl)imidazolidin-2-ylidene]copper(I) chloride**  
**[CuCl(SIMes<sup>Me</sup>)]**

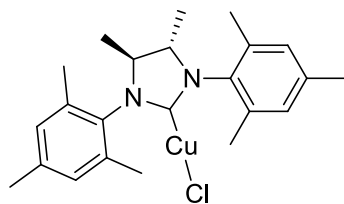

[1,3-Bis(2,4,6-trimethylphenyl)-4,5-*trans*-dimethyl]imidazolidinium chloride (124.8 mg, 0.336 mmol, 1.00 eq), copper powder (42.8 mg, 0.673 mmol, 2.00 eq) and water (50  $\mu$ L) were introduced in a 12 mL stainless steel grinding bowl with fifty stainless steel balls (0.5 cm diameter). Total mass of the reagents was calculated so that milling load equals 19.2 mg/mL. The bowl was closed, placed in the planetary ball-mill and subjected to grinding for 6 hours at 450 rpm. Reaction mixture was recovered with dichloromethane and filtrated over celite. The filtrate was concentrated under vacuum. The resulting white powder was washed with diethyl ether to afford [(1,3-bis-(2,4,6-trimethylphenyl)-4,5-*trans*-dimethyl)imidazolidin-2-ylidene]copper(I) chloride (130.7 mg, 0.302 mmol, 90%) as a white powder.

**<sup>1</sup>H NMR (300 MHz, CDCl<sub>3</sub>)**  $\delta$  6.96 (s, 2H), 6.92 (s, 2H), 4.05 – 3.88 (m, 2H), 2.37 (s, 6H), 2.30 (s, 6H), 2.28 (s, 6H), 1.28 (d,  $J$  = 5.6 Hz, 6H) ; The product was not stable in solution but peaks were identified as followed: **<sup>13</sup>C NMR (101 MHz, CDCl<sub>3</sub>)**  $\delta$  202.8, 138.5, 136.70, 135.4, 133.9, 130.1, 66.4, 21.1, 19.3, 18.5, 18.2 ; **HRMS** calcd for C<sub>46</sub>H<sub>60</sub>N<sub>4</sub>Cu [M – Cl]<sup>+</sup>: 731.4114; found: 731.4105

### 1.5 [Cu(NHC)<sub>2</sub>]<sup>+</sup>Y<sup>-</sup> (Y = BF<sub>4</sub> or PF<sub>6</sub>) synthesis

#### Bis[1,3-bis(2,4,6-trimethylphenyl)imidazol-2-ylidene]copper tetrafluoroborate [Cu(IMes)<sub>2</sub>]<sup>+</sup>BF<sub>4</sub><sup>-</sup>

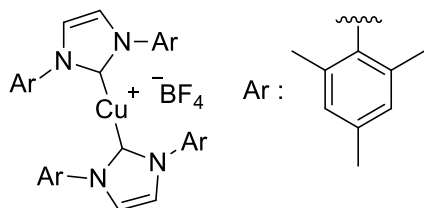

1,3-Bis-(2,4,6-trimethylphenyl)imidazolium tetrafluoroborate (104.9 mg, 0.267 mmol, 1.00 eq), copper powder (51.0 mg, 0.802 mmol, 3.00 eq) and sodium hydroxide (11.8 mg, 0.294 mmol, 1.10 eq) were introduced in a 12 mL stainless steel grinding bowl with fifty stainless steel balls (0.5 cm diameter). Total mass of the reagents was calculated so that milling load equals 19.2 mg/mL. The bowl was closed, placed in the planetary ball-mill and subjected to grinding for 3 hours at 450 rpm. Reaction mixture was recovered with dichloromethane and filtrated over celite. The filtrate was concentrated under vacuum to afford bis[1,3-bis(2,4,6-trimethylphenyl)imidazol-2-ylidene]copper tetrafluoroborate (79.7 mg, 0.105 mmol, 79%) as a white solid.

<sup>1</sup>H NMR (400 MHz, DMSO-*d*<sub>6</sub>)<sup>[13]</sup> δ 7.51 (s, 4H), 6.98 (s, 8H), 2.38 (s, 12H), 1.61 (s, 24H); <sup>13</sup>C NMR (101 MHz, DMSO-*d*<sub>6</sub>) δ 176.9, 139.3, 134.9, 134.5, 129.2, 123.6, 21.1, 16.9; <sup>19</sup>F NMR (376 MHz, DMSO-*d*<sub>6</sub>) δ -148.2

#### Bis[1,3-bis(2,4,6-trimethylphenyl)imidazol-2-ylidene]copper hexafluorophosphate [Cu(IMes)<sub>2</sub>]<sup>+</sup>PF<sub>6</sub><sup>-</sup>

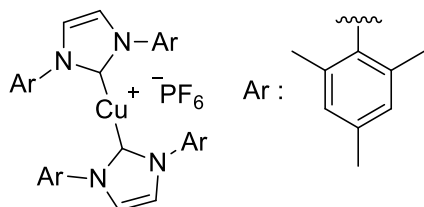

1,3-Bis-(2,4,6-trimethylphenyl)imidazolium hexafluorophosphate (110.2 mg, 0.245 mmol, 1.00 eq), copper powder (46.6 mg, 0.734 mmol, 3.00 eq) and sodium hydroxide (10.8 mg, 0.269 mmol, 1.10 eq) were introduced in a 12 mL stainless steel grinding bowl with fifty stainless steel balls (0.5 cm diameter). Total mass of the reagents was calculated so that milling load equals 19.2 mg/mL. The bowl was closed, placed in the planetary ball-mill and subjected to grinding for 6 hour at 450 rpm. Reaction mixture was recovered with dichloromethane and filtrated over celite. The filtrate was concentrated under vacuum to afford bis[1,3-bis(2,4,6-trimethylphenyl)imidazol-2-ylidene]copper hexafluorophosphate (87.0 mg, 0.106 mmol, 87%) as a white solid.

<sup>1</sup>H NMR (400 MHz, DMSO-*d*<sub>6</sub>)<sup>[12]</sup> δ 7.51 (s, 4H), 6.98 (s, 8H), 2.38 (s, 12H), 1.61 (s, 24H); <sup>13</sup>C NMR (101 MHz, DMSO-*d*<sub>6</sub>) δ 176.9, 139.3, 134.9, 134.5, 129.2, 123.6, 21.1, 16.8; <sup>31</sup>P NMR (162 MHz, DMSO-*d*<sub>6</sub>) δ -144.2 (sept, *J* = 711.2 Hz); <sup>19</sup>F NMR (376 MHz, DMSO-*d*<sub>6</sub>) δ -70.1 (d, *J* = 711.3 Hz)

**Bis[1,3-bis(2,6-diisopropylphenyl)imidazol-2-ylidene]copper tetrafluoroborate [Cu(IPr)<sub>2</sub>]BF<sub>4</sub>**

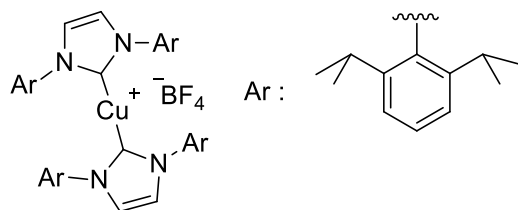

1,3-Bis-(2,6-diisopropylphenyl)imidazolium tetrafluoroborate (95.3 mg, 0.200 mmol, 1.00 eq), copper powder (63.5 mg, 1.00 mmol, 5.00 eq) and sodium hydroxide (8.8 mg, 0.220 mmol, 1.10 eq) were introduced in a 12 mL stainless steel grinding bowl with fifty stainless steel balls (0.5 cm diameter). Total mass of the reagents was calculated so that milling load equals 19.2 mg/mL. The bowl was closed, placed in the planetary ball-mill and subjected to grinding for 5 hours at 450 rpm. Reaction mixture was recovered with dichloromethane and filtrated over celite. The filtrate was concentrated under vacuum. The resulting white powder was washed three times with diethyl ether and dried under vacuum to afford bis[1,3-bis(2,6-diisopropylphenyl)imidazol-2-ylidene]copper tetrafluoroborate (78.9 mg, 0.0851 mmol, 85%) as a white solid.

<sup>1</sup>H NMR (400 MHz, DMSO-*d*<sub>6</sub>)<sup>[15]</sup> δ 7.66 (s, 4H), 7.49 (t, *J* = 7.8 Hz, 4H), 7.18 (d, *J* = 7.8 Hz, 8H), 2.24 (sept, *J* = 6.9 Hz, 8H), 0.97 (d, *J* = 6.9 Hz, 24H), 0.80 (d, *J* = 6.9 Hz, 24H); <sup>13</sup>C NMR (101 MHz, DMSO-*d*<sub>6</sub>) δ 176.5, 144.6, 134.7, 130.3, 126.0, 124.2, 28.3, 23.9, 23.8; <sup>19</sup>F NMR (376 MHz, DMSO-*d*<sub>6</sub>) δ -148.3

**Bis[1,3-bis(2,6-diisopropylphenyl)imidazol-2-ylidene]copper hexafluorophosphate [Cu(IPr)<sub>2</sub>]PF<sub>6</sub>**

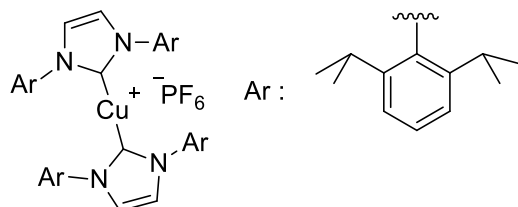

1,3-Bis-(2,6-diisopropylphenyl)imidazolium hexafluorophosphate (83.6 mg, 0.156 mmol, 1.00 eq), copper powder (49.7 mg, 0.782 mmol, 5.00 eq) and potassium bis(trimethylsilyl)amide (34.3 mg, 0.172 mmol, 1.10 eq) were introduced in a 12 mL stainless steel grinding bowl with fifty stainless steel balls (0.5 cm diameter). Total mass of the reagents was calculated so that milling load equals 19.2 mg/mL. The bowl was closed, placed in the planetary ball-mill and subjected to grinding for 6 hours at 450 rpm. Reaction mixture was recovered with dichloromethane and filtrated over celite. The filtrate was concentrated under vacuum. The resulting white powder was washed three times with diethyl ether and dried under vacuum to afford bis[1,3-bis(2,6-diisopropylphenyl)imidazol-2-ylidene]copper hexafluorophosphate (68.8 mg, 0.0698 mmol, 89%) as a white solid.

<sup>1</sup>H NMR (400 MHz, DMSO-*d*<sub>6</sub>)<sup>[15]</sup> δ 7.68 (s, 4H), 7.49 (t, *J* = 7.8 Hz, 4H), 7.18 (d, *J* = 7.8 Hz, 8H), 2.24 (hept, *J* = 6.7 Hz, 8H), 0.97 (d, *J* = 6.8 Hz, 24H), 0.81 (d, *J* = 6.9 Hz, 24H); <sup>13</sup>C NMR (101 MHz, DMSO-*d*<sub>6</sub>) δ 176.4, 144.5, 134.6, 130.2, 126.0, 124.2, 28.2, 23.9, 23.8; <sup>31</sup>P NMR (162 MHz, DMSO-*d*<sub>6</sub>) δ -144.2 (hept, *J* = 711.2 Hz); <sup>19</sup>F NMR (376 MHz, DMSO-*d*<sub>6</sub>) δ -70.2 (d, *J* = 711.2 Hz)

**Bis[(1,3-bis(2,4,6-trimethylphenyl)-4,5-dimethyl)imidazol-2-ylidene]copper tetrafluoroborate**  
**[Cu(IMes<sup>Me</sup>)<sub>2</sub>]BF<sub>4</sub>**

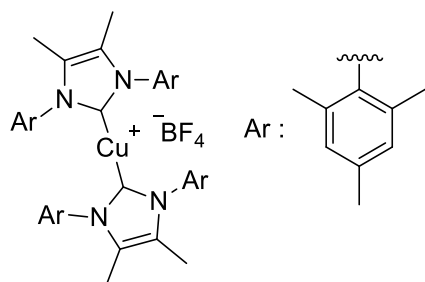

[1,3-Bis(2,4,6-trimethylphenyl)-4,5-dimethyl]imidazolium tetrafluoroborate (107.5 mg, 0.256 mmol, 1.00 eq), copper powder (48.8 mg, 0.768 mmol, 3.00 eq) and sodium hydroxide (11.3 mg, 0.768 mmol, 1.10 eq) were introduced in a 12 mL stainless steel grinding bowl with fifty stainless steel balls (0.5 cm diameter). Total mass of the reagents was calculated so that milling load equals 19.2 mg/mL. The bowl was closed, placed in the planetary ball-mill and subjected to grinding for 6 hours at 450 rpm. Reaction mixture was recovered with dichloromethane and filtrated over celite. The filtrate was concentrated under vacuum. The resulting powder was washed with diethyl ether and dried under vacuum to afford bis[(1,3-bis(2,4,6-trimethylphenyl)-4,5-dimethyl)imidazol-2-ylidene]copper tetrafluoroborate (95.0 mg, 0.117 mmol, 91%) as a brown powder.

<sup>1</sup>H NMR (400 MHz, DMSO-*d*<sub>6</sub>) δ 7.01 (s, 8H), 2.41 (s, 12H), 1.76 (s, 12H), 1.56 (s, 24H) ; <sup>13</sup>C NMR (101 MHz, DMSO-*d*<sub>6</sub>) δ 173.4, 138.7, 134.4, 132.9, 128.9, 125.5, 20.7, 16.5, 8.3 ; <sup>19</sup>F NMR (376 MHz, DMSO-*d*<sub>6</sub>) δ -148.3 ; HRMS calcd for C<sub>46</sub>H<sub>56</sub>N<sub>4</sub>Cu [M – BF<sub>4</sub>]<sup>+</sup>: 727.3801; found: 727.3802

**Bis[(1,3-bis(2,4,6-trimethylphenyl)-4,5-dimethyl)imidazol-2-ylidene]copper hexafluorophosphate**  
**[Cu(IMes<sup>Me</sup>)<sub>2</sub>]PF<sub>6</sub>**

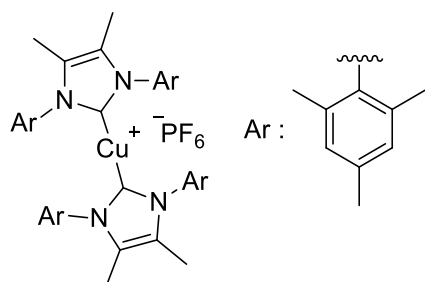

[1,3-Bis(2,4,6-trimethylphenyl)-4,5-dimethyl]imidazolium hexafluorophosphate (112.4 mg, 0.235 mmol, 1.00 eq), copper powder (44.8 mg, 0.705 mmol, 3.00 eq) and sodium hydroxide (10.3 mg, 0.258 mmol, 1.10 eq) were introduced in a 12 mL stainless steel grinding bowl with fifty stainless steel balls (0.5 cm diameter). Total mass of the reagents was calculated so that milling load equals 19.2 mg/mL. The bowl was closed, placed in the planetary ball-mill and subjected to grinding for 6 hours at 450 rpm. Reaction mixture was recovered with dichloromethane and filtrated over celite. The filtrated was concentrated under vacuum. The resulting powder was washed with diethyl ether



and dried under vacuum to afford bis[(1,3-bis(2,4,6-trimethylphenyl)-4,5-dimethyl)imidazol-2-ylidene]copper hexafluorophosphate (100.0 mg, 0.114 mg, 97%) as a brown powder.

**<sup>1</sup>H NMR (400 MHz, DMSO-*d*<sub>6</sub>)** δ 7.01 (s, 8H), 2.41 (s, 12H), 1.76 (s, 12H), 1.56 (s, 24H) ; **<sup>13</sup>C NMR (101 MHz, DMSO-*d*<sub>6</sub>)** δ 173.6, 138.7, 134.4, 132.9, 128.9, 125.6, 20.7, 16.5, 8.3 ; **<sup>31</sup>P NMR (162 MHz, DMSO-*d*<sub>6</sub>)** δ -144.2 (sept, *J* = 711.3 Hz) ; **<sup>19</sup>F NMR (376 MHz, DMSO-*d*<sub>6</sub>)** δ -70.1 (d, *J* = 711.3 Hz) ; **HRMS** calcd for C<sub>46</sub>H<sub>56</sub>N<sub>4</sub>Cu [M – PF<sub>6</sub>]<sup>+</sup>: 727.3801; found: 727.3800

**Bis[(1,3-bis(2,6-diisopropylphenyl)-4,5-dimethyl)imidazol-2-ylidene]copper tetrafluoroborate**  
**[Cu(IPr<sup>Me</sup>)<sub>2</sub>]BF<sub>4</sub>**

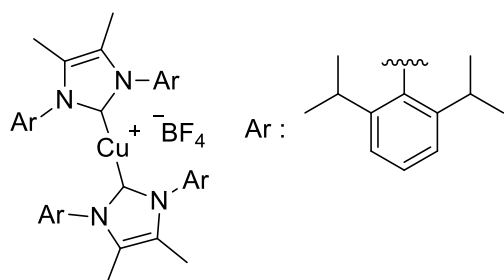

[1,3-Bis(2,6-diisopropylphenyl)-4,5-dimethyl]imidazolium tetrafluoroborate (81.2 mg, 0.161 mmol, 1.00 eq), copper powder (51.1 mg, 0.804 mmol, 5.00 eq) and potassium bis(trimethylsilyl)amide (35.3 mg, 0.177 mmol, 1.10 eq) were introduced in a 12 mL stainless steel grinding bowl with fifty stainless steel balls (0.5 cm diameter). Total mass of the reagents was calculated so that milling load equals 19.2 mg/mL. The bowl was closed, placed in the planetary ball-mill and subjected to grinding for 6 hours at 450 rpm. Reaction mixture was recovered with dichloromethane and filtrated over celite. The filtrate was concentrated under vacuum. The resulting solid was washed with diethyl ether and dried under vacuum to afford bis[(1,3-bis(2,6-diisopropylphenyl)-4,5-dimethyl)imidazol-2-ylidene]copper tetrafluoroborate (57.2 mg, 0.0582 mmol, 72%) as a white solid.

**<sup>1</sup>H NMR (400 MHz, DMSO-*d*<sub>6</sub>)** δ 7.53 (t, *J* = 7.5 Hz, 4H), 7.40 (d, *J* = 7.5 Hz, 8H), 2.45 – 2.34 (m, 8H), 1.89 (s, 12H), 1.20 (d, *J* = 6.0 Hz, 48H); **<sup>13</sup>C NMR (101 MHz, DMSO-*d*<sub>6</sub>)** δ 145.5, 133.0, 130.2, 125.8, 124.1, 28.2, 25.0, 22.9, 9.0 ; **<sup>19</sup>F NMR (376 MHz, DMSO-*d*<sub>6</sub>)** δ -148.3 ; **HRMS** calcd for C<sub>58</sub>H<sub>80</sub>N<sub>4</sub>Cu [M – BF<sub>4</sub>]<sup>+</sup>: 895.5679; found: 895.5664

**Bis[(1,3-bis(2,6-diisopropylphenyl)-4,5-dimethyl)imidazol-2-ylidene]copper hexafluorophosphate**  
**[Cu(IPr<sup>Me</sup>)<sub>2</sub>]PF<sub>6</sub>**

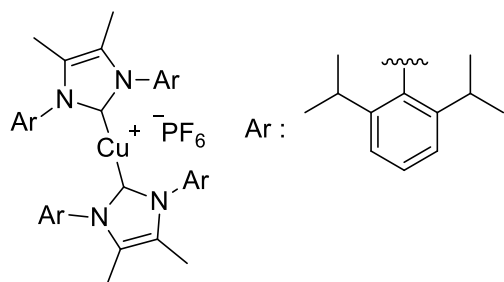

[1,3-Bis(2,6-diisopropylphenyl)-4,5-dimethyl]imidazolium hexafluorophosphate (50.2 mg, 0.0892 mmol, 1.00 eq), copper powder (51.1 mg, 0.446 mmol, 5.00 eq) and potassium bis(trimethylsilyl)amide (28.4 mg, 0.446 mmol, 5.00 eq) were introduced in a 12 mL stainless steel grinding bowl with fifty stainless steel balls (0.5 cm diameter). Total mass of the reagents was calculated so that milling load equals 19.2 mg/mL. The bowl was closed, placed in the planetary ball mill and subjected to grinding for 6 hours at 450 rpm. Reaction mixture was recovered with dichloromethane and filtrated over celite. The filtrate was concentrated under vacuum. The resulting solid was washed with diethyl ether and dried under vacuum to afford a mixture of bis[(1,3-bis(2,6-diisopropylphenyl)-4,5-dimethyl)imidazol-2-ylidene]copper hexafluorophosphate and a second copper complex of unidentified structure (36.1 mg, 0.0347 mmol, 78%) as a white solid.

**<sup>1</sup>H NMR (400 MHz, DMSO-*d*<sub>6</sub>)** δ 7.55 – 7.50 (4H, [(IPr<sup>Me</sup>)<sub>2</sub>Cu]PF<sub>6</sub> and second complex), 7.40 (d, *J* = 7.6 Hz, 8H, [(IPr<sup>Me</sup>)<sub>2</sub>Cu]PF<sub>6</sub>), 7.21 (d, *J* = 7.8 Hz, second complex), 2.39 (m, 8H, [(IPr<sup>Me</sup>)<sub>2</sub>Cu]PF<sub>6</sub>), 2.18 (sept, *J* = 6.7 Hz, second complex), 1.89 (s, 12H, [(IPr<sup>Me</sup>)<sub>2</sub>Cu]PF<sub>6</sub>), 1.60 (s, second complex), 1.20 (d, *J* = 6.5 Hz, 48H, [(IPr<sup>Me</sup>)<sub>2</sub>Cu]PF<sub>6</sub>), 0.97 (d, *J* = 6.8 Hz, second complex), 0.73 (d, *J* = 6.9 Hz, second complex) ; **<sup>13</sup>C NMR (101 MHz, DMSO-*d*<sub>6</sub>)** 145.5 ([IPr<sup>Me</sup>)<sub>2</sub>Cu]PF<sub>6</sub>), 144.7, 133.0 ([IPr<sup>Me</sup>)<sub>2</sub>Cu]PF<sub>6</sub>), 130.5, 130.2 ([IPr<sup>Me</sup>)<sub>2</sub>Cu]PF<sub>6</sub>), 127.5, 125.7 ([IPr<sup>Me</sup>)<sub>2</sub>Cu]PF<sub>6</sub>), 124.5, 124.1 ([IPr<sup>Me</sup>)<sub>2</sub>Cu]PF<sub>6</sub>), 28.2 ([IPr<sup>Me</sup>)<sub>2</sub>Cu]PF<sub>6</sub>), 28.1, 25.0 ([IPr<sup>Me</sup>)<sub>2</sub>Cu]PF<sub>6</sub>), 24.8, 22.9 ([IPr<sup>Me</sup>)<sub>2</sub>Cu]PF<sub>6</sub>), 22.5, 9.3, 9.0 ([IPr<sup>Me</sup>)<sub>2</sub>Cu]PF<sub>6</sub>); **<sup>31</sup>P NMR (162 MHz, DMSO-*d*<sub>6</sub>)** δ -144.2 (sept, *J* = 711.3 Hz) ; **<sup>19</sup>F NMR (376 MHz, DMSO-*d*<sub>6</sub>)** δ -70.2 (d, *J* = 711.5 Hz); **HRMS** calcd for C<sub>58</sub>H<sub>80</sub>N<sub>4</sub>Cu [M – PF<sub>6</sub>]<sup>+</sup>: 895.5679; found: 895.5662

## 2. Influence of reagent stoichiometry for the production of [CuCl(IMes)]

### 2.1 Influence of copper stoichiometry

General procedure with water in a ball-mill: 1,3-bis-(2,4,6-trimethylphenyl)imidazolium chloride IMes·HCl (1.00 eq), copper powder (1.00 – 5.00 eq) and water (50  $\mu$ L, 0.3 $\mu$ L/mg) were introduced in a 12 mL stainless steel grinding bowl with fifty stainless steel balls (0.5 cm diameter). Total mass of the reagents was calculated so that milling load equals 19.2 mg/mL. The bowl was closed, placed in the planetary ball-mill and subjected to grinding at 450 rpm during a given amount of time. Reaction mixture samples were regularly withdrawn from the bowl. In each cases, grinding was stopped less than five minutes to prepare each samples.

General procedure without water in a ball-mill: 1,3-bis-(2,4,6-trimethylphenyl)imidazolium chloride IMes·HCl (1.00 eq) and copper powder (1.00 – 5.00 eq) were introduced in a 12 mL stainless steel grinding bowl with fifty stainless steel balls (0.5 cm diameter). Total mass of the reagents was calculated so that milling load equals 19.2 mg/mL. The bowl was closed, placed in the planetary ball-mill and subjected to grinding at 450 rpm during a given amount of time. Reaction mixture samples were regularly withdrawn from the bowl. In each cases, grinding was stopped less than five minutes to prepare each samples.

To prepare NMR samples, 1 or 2 mg of the reaction mixture were dissolved in 0.6 mL of deuterated chloroform, filtrated over celite and analyzed by  $^1\text{H}$  NMR to determine conversion.

| Entry | IMes·HCl |                 | Copper powder |                 | Water ( $\mu$ L;eq.) | NMR conv. (%) |        |    |      |    |     |    |     |    |    | Yield (%) |
|-------|----------|-----------------|---------------|-----------------|----------------------|---------------|--------|----|------|----|-----|----|-----|----|----|-----------|
|       | Eq.      | Quantity (mmol) | Eq.           | Quantity (mmol) |                      | 30 min        | 40 min | 1h | 1.5h | 2h | 3h  | 4h | 5h  | 6h | 8h |           |
| 1     | 1.00     | 0.414           | 1.00          | 0.414           | 50;6.7               |               |        | 3  |      | 15 |     | 62 |     | 81 | 97 | 79        |
| 2     | 1.00     | 0.358           | 2.00          | 0.716           | 50;7.8               | 2             |        | 12 |      | 76 | 92  | 97 | 100 |    |    | 85        |
| 3     |          |                 |               |                 | 0;0                  |               |        | 0  |      | 0  |     | 8  |     | 13 | 34 | -         |
| 4     | 1.00     | 0.254           | 5.00          | 1.272           | 50;10.9              | 8             | 8      | 16 | 62   | 96 | 100 |    |     |    |    | 85        |
| 5     |          |                 |               |                 | 0;0                  |               |        | 12 |      | 41 |     | 60 |     | 69 | 80 | -         |

General procedure in diluted aqueous conditions under magnetic stirring: 1,3-bis-(2,4,6-trimethylphenyl)imidazolium chloride IMes·HCl (1.00 eq) was introduced in a round-bottom flask equipped with a condenser and dissolved in water (0.02M; 117 $\mu$ L/mg for 2 eq. of copper, 76 $\mu$ L/mg for 5 eq. of copper). Copper powder (2.00 – 5.00 eq) was added and the resulting reaction mixture was heated at reflux under air. After four hours, 1 mL of the hot reaction mixture was withdrawn from the reaction mixture, filtrated over celite and concentrated under vacuum. The resulting white solid was dissolved in deuterium chloroform and analyzed by  $^1\text{H}$  NMR to determine conversion. After eight hours, another sample was prepared as described above.

General procedure in concentrated aqueous conditions under magnetic stirring: 1,3-bis-(2,4,6-trimethylphenyl)imidazolium chloride IMes·HCl (1.00 eq) and copper powder (2.00 – 5.00 eq) were introduced in a round-bottom flask equipped with a condenser. Water (50  $\mu$ L, 0.3 $\mu$ L/mg) was added

and the resulting reaction mixture was stirred and heated at 100°C under air. After four hours, the reaction mixture was cooled down to room temperature and few milligrams of the reaction mixture were withdrawn from the flask, dissolved in deuterated chloroform, filtrated over celite and analyzed by  $^1\text{H}$  NMR to determine conversion. After eight hours, another sample was prepared as described above.

| Entry    | IMes·HCl |                 | Copper powder |                 | Water (mL;eq.) | NMR conv. (%) |    |
|----------|----------|-----------------|---------------|-----------------|----------------|---------------|----|
|          | Eq.      | Quantity (mmol) | Eq.           | Quantity (mmol) |                | 4h            | 8h |
| <b>1</b> | 1.00     | 0.358           | 2.00          | 0.716           | 17.9;2778      | 3             | 4  |
| <b>2</b> |          |                 |               |                 | 0.050;7.7      | 0             | 0  |
| <b>3</b> | 1.00     | 0.254           | 5.00          | 1.272           | 12.7;2778      | 12            | 19 |
| <b>4</b> |          |                 |               |                 | 0.050;10.9     | 0             | 0  |

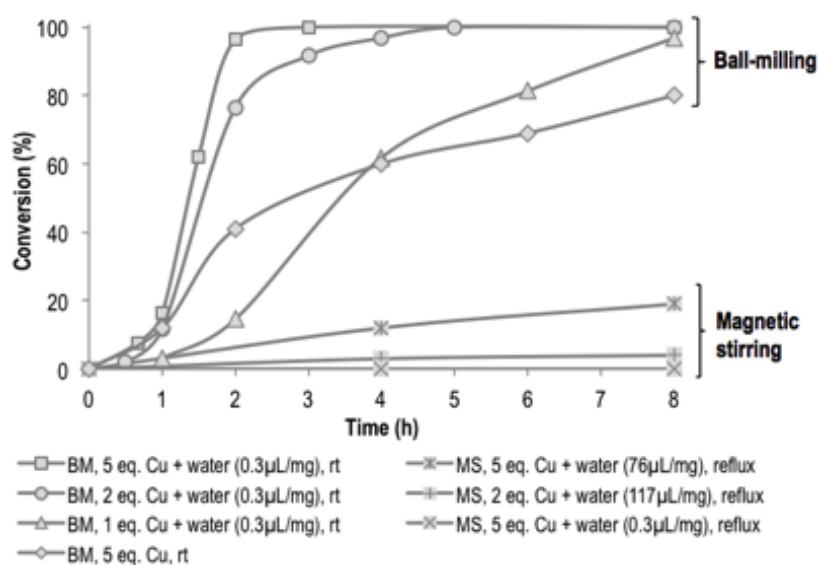

MS = Magnetic stirring; BM = Ball-milling.

## 2.2 Influence of dioxygen stoichiometry

General procedure: Two bowls were prepared as follows: 1,3-bis-(2,4,6-trimethylphenyl)imidazolium chloride **IMes·HCl** (1.00 eq) and **copper powder** (5.00 eq) were introduced in a 12 mL stainless steel grinding bowl with fifty stainless steel balls (0.5 cm diameter). The bowls were closed hermetically with parafilm, placed together in the planetary ball-mill and subjected to grinding at 450 rpm during **T<sub>1</sub>**. Then, one bowl was removed and the second bowl (without opening) was subjected to grinding during **T<sub>2</sub>**. For the first bowl after **T<sub>1</sub>** and the second bowl after **T<sub>1</sub>+T<sub>2</sub>**, reaction mixture was recovered with dichloromethane and filtrated over celite. The filtrates were concentrated under vacuum and analyzed by <sup>1</sup>H NMR to determine conversion. This reaction was repeated with changing the total amount of material (IMes·HCl + copper powder) introduced in the bowl to vary the amount of O<sub>2</sub> present inside the hermetically closed bowl. To confirm the good homogenization of the reaction mixture inside the bowl, three samples of the reaction mixture with the highest milling load (entries 10 and 11) were withdrawn at three different spots inside the bowl. <sup>1</sup>H NMR analysis of these samples indicated identical conversion for the three different spots, confirming perfect homogeneization of the reaction mixture. All data are reported in the following table.

| Entry | IMes·HCl (mmol) | Cu powder (mmol) | Milling Load (mg/mL) | O <sub>2</sub> (μmol) | O <sub>2</sub> (eq) | Vf (mL) | Time (h)       |                | NMR conv. (%) | Yield <sup>[a]</sup> (%) |
|-------|-----------------|------------------|----------------------|-----------------------|---------------------|---------|----------------|----------------|---------------|--------------------------|
|       |                 |                  |                      |                       |                     |         | T <sub>1</sub> | T <sub>2</sub> |               |                          |
| 1     | 0.254           | 1.270            | 19.4                 | 80.8                  | 1.27                | 8.64    | -              | 6              | 100           | 83                       |
| 2     | 0.317           | 1.586            | 24.2                 | 80.6                  | 1.02                | 8.62    | 7              | -              | 70            | 55                       |
| 3     | 0.317           | 1.586            | 24.2                 | 80.6                  | 1.02                |         | 7              | 6              | 67            | 60                       |
| 4     | 0.419           | 2.095            | 32.2                 | 80.3                  | 0.77                | 8.58    | 12             | -              | 47            | 40                       |
| 5     | 0.419           | 2.095            | 32.2                 | 80.3                  | 0.77                |         | 12             | 5              | 43            | 40                       |
| 6     | 0.617           | 3.084            | 47.7                 | 79.6                  | 0.52                | 8.52    | 15             | -              | 29            | 27                       |
| 7     | 0.617           | 3.084            | 47.7                 | 79.6                  | 0.52                |         | 15             | 5              | 28            | 27                       |
| 8     | 1.169           | 5.846            | 92.5                 | 77.8                  | 0.27                | 8.32    | 18             | -              | 5             | 5                        |
| 9     | 1.169           | 5.846            | 92.5                 | 77.8                  | 0.27                |         | 18             | 6              | 5             | 5                        |
| 10    | 1.560           | 7.801            | 125.6                | 76.5                  | 0.20                | 8.18    | 21             | -              | 0             | 0                        |
| 11    | 1.560           | 7.801            | 125.6                | 76.5                  | 0.20                |         | 21             | 9              | 0             | 0                        |

<sup>[a]</sup> Yields were calculated by using the isolated yield of the crude product and the NMR conversion.

The equivalents of O<sub>2</sub>, corresponding to the O<sub>2</sub>/IMes·HCl ratio, was determined based on the following oxido-reduction reaction leading to the formation of Cu(I) from Cu(0) and O<sub>2</sub>:

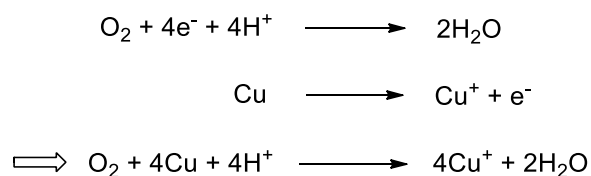

One molecule of dioxygen oxidize four copper atoms and one IMes·HCl molecule reacts with one copper atom. Then, only 0.25 eq of dioxygen should be necessary to obtain complete conversion of IMes·HCl. In other words,  $n_{\text{dioxygen}} = 0.25 n_{\text{IMes·HCl}}$

The moles of dioxygen present in the bowl was calculated as follows:

$$n_{\text{dioxygen}} = V_{\text{dioxygen}} / 22.414$$

$$\text{and } V_{\text{dioxygen}} = 0.2095 V_f$$

where  $V_f$ : free volume

$V_f$  was calculated using the following equation:

$$V_f = V_t - n_b * V_b - \sum V_{\text{reagent}}$$

where

$V_t$ : total volume of the bowl

$n_b$ : number of balls

$V_b$ : volume of one ball

$V_{\text{reagent}}$ : reagent volume

$V_{\text{reagent}}$  was calculated based on the mass of the reactants introduced in the bowl and on their density. Density of IMes·HCl was calculated as being 1.09 g.mL<sup>-1</sup>, SIMes·HCl as being 1.07 g.mL<sup>-1</sup>, IPr·HCl as being 0.954 g.mL<sup>-1</sup> and SIPr·HCl as being 0.997 g.mL<sup>-1</sup>. Density of copper powder is 8.94 g.mL<sup>-1</sup>.  $M(\text{IMes·HCl}) = 340.89 \text{ g.mol}^{-1}$ .  $M(\text{Cu}) = 63.55 \text{ g.mol}^{-1}$ .

As an example, for the first entry:  $V_f = 12 - 50 * 0.0654 - \left( \frac{0.0807}{8.94} + \frac{0.0866}{1.09} \right) = 8.64 \text{ mL}$

and  $n_{\text{dioxygen}} = 0.2095 \times 0.00864 / 22.414 = 80.9 \text{ } \mu\text{mol}$

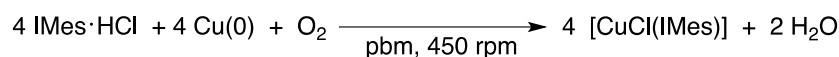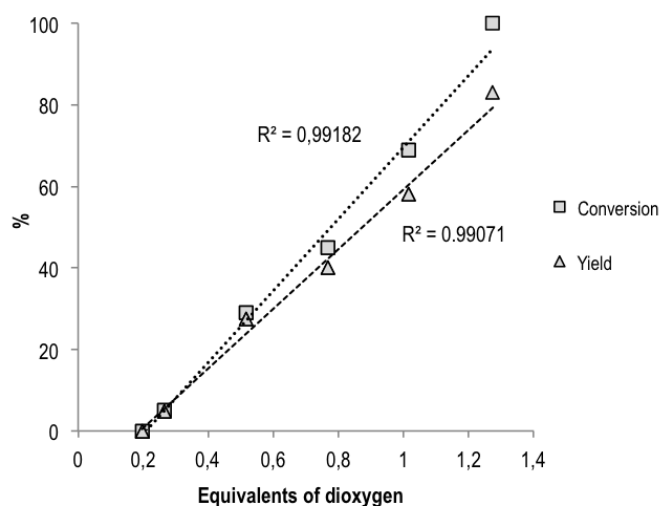

### 3. X-Ray data

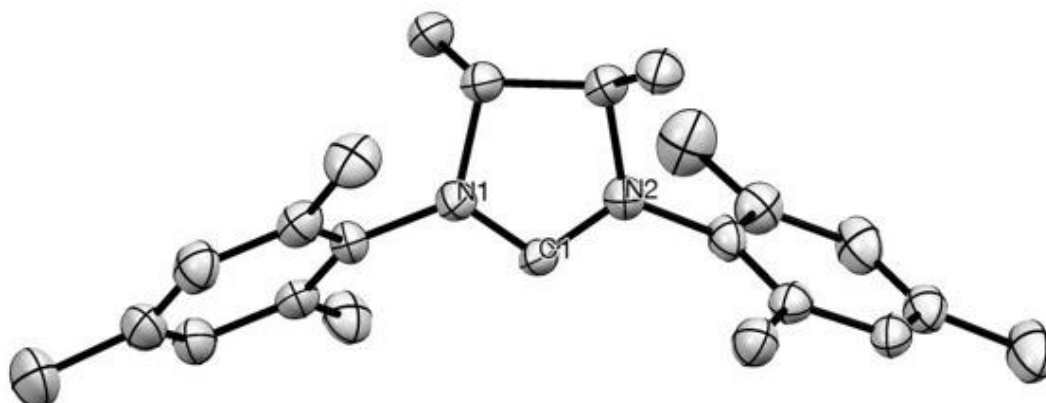

X-Ray diffraction of  $\text{SIMes}^{\text{Me}}\cdot\text{HCl}$  (CCDC 1487556) indicating the trans configuration.

|                                            | <b><math>\text{SIMes}^{\text{Me}}\cdot\text{HCl}</math></b> |
|--------------------------------------------|-------------------------------------------------------------|
| Formula                                    | $\text{C}_{23}\text{H}_{31}\text{ClN}_2$                    |
| $M / \text{g.mol}^{-1}$                    | 370.95                                                      |
| Crystal system                             | Monoclinic                                                  |
| Space group                                | P 21/n                                                      |
| $a / \text{\AA}$                           | 8.9790 (3)                                                  |
| $b / \text{\AA}$                           | 15.1223 (5)                                                 |
| $c / \text{\AA}$                           | 15.7117 (8)                                                 |
| $\alpha / ^\circ$                          | 90                                                          |
| $\beta / ^\circ$                           | 100.137 (4)                                                 |
| $\gamma / ^\circ$                          | 90                                                          |
| $V (\text{\AA}^3)$                         | 2100.08 (11)                                                |
| $Z$                                        | 4                                                           |
| $\rho_{\text{calcd}} / \text{g.cm}^{-3}$   | 1.173                                                       |
| $\mu (\text{Mo K}\alpha) / \text{mm}^{-1}$ | 1.652                                                       |
| $T / \text{K}$                             | 175                                                         |
| Number of reflections                      | 4293                                                        |
| Number of unique reflections               | 1954                                                        |
| $R_{\text{int}}$                           | 0.104                                                       |
| $R1, wR2 (I > 2\sigma(I))$                 | 0.0678, 0.0709                                              |
| $R1, wR2 (\text{all data})$                | 0.0751, 0.0720                                              |
| GOF                                        | 1.0291                                                      |

## 4. NMR Spectra

### 4.1 Imidazolium salts

#### 1,3-Bis-(2,4,6-trimethylphenyl)imidazolium chloride IMes-HCl

$^1\text{H}$  NMR (300MHz,  $\text{CDCl}_3$ )

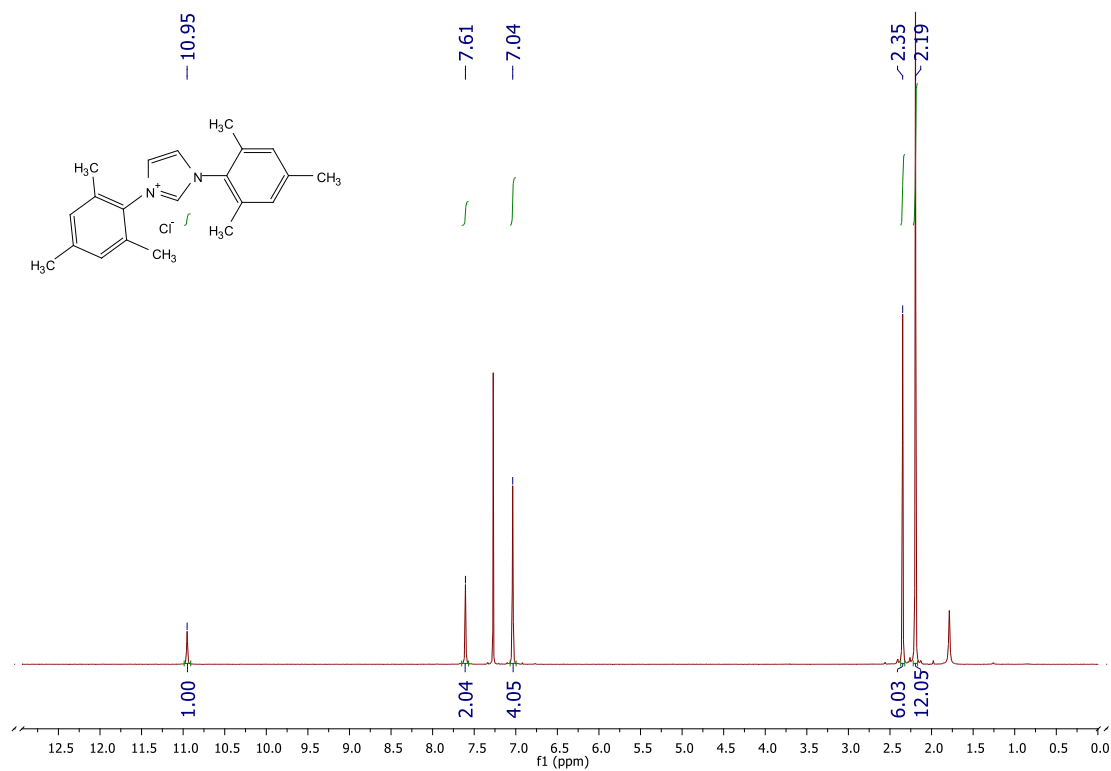

$^{13}\text{C}$  NMR (75 MHz,  $\text{CDCl}_3$ )

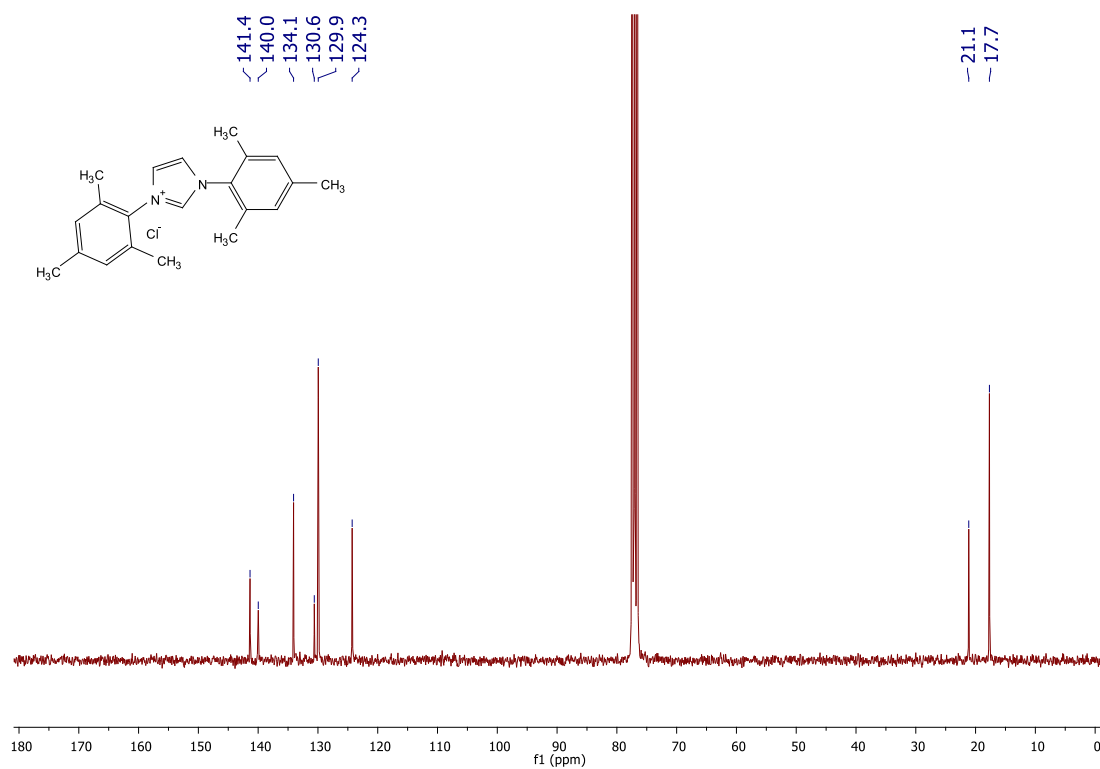



**1,3-Bis-(2,4,6-trimethylphenyl)imidazolium tetrafluoroborate IMes-HBF<sub>4</sub>**

<sup>1</sup>H NMR (400MHz, DMSO-*d*<sub>6</sub>)

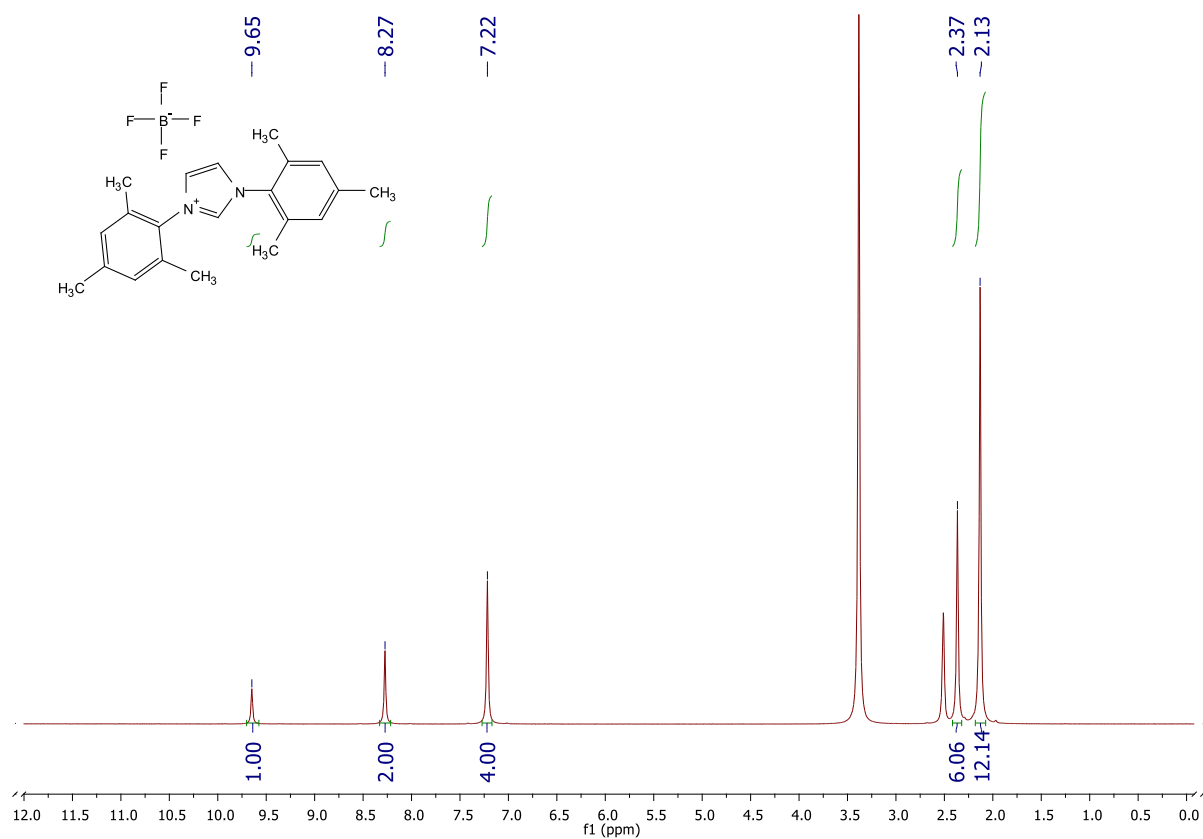

<sup>13</sup>C NMR (101 MHz, DMSO-*d*<sub>6</sub>)

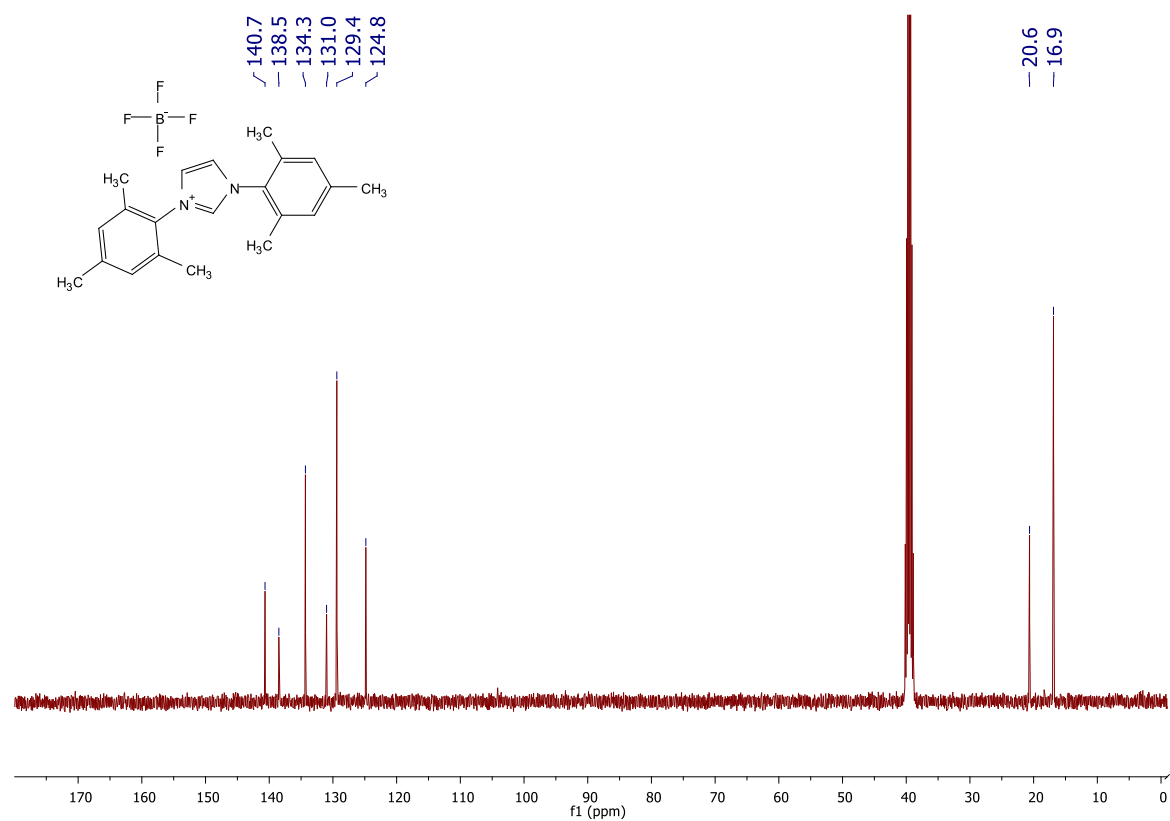

$^{19}\text{F}$  NMR (376 MHz,  $\text{DMSO-}d_6$ )

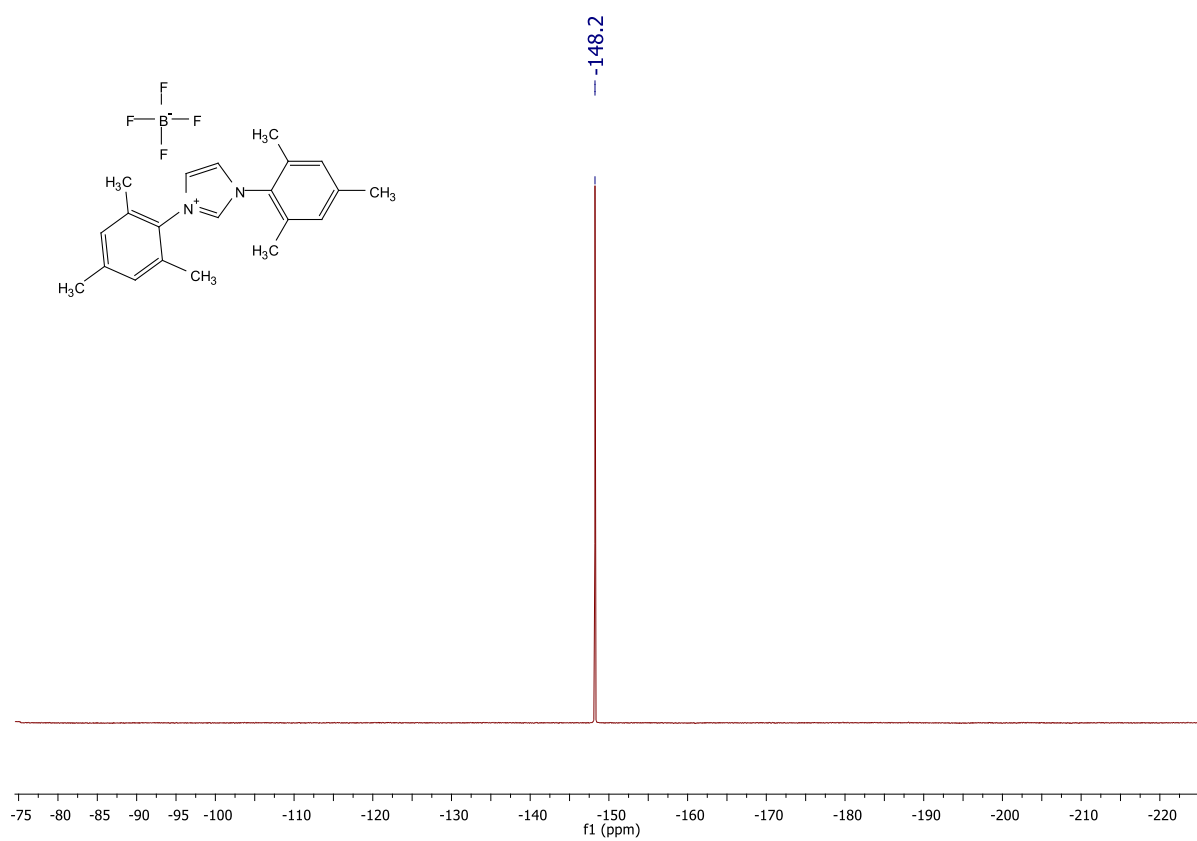

**1,3-Bis-(2,4,6-trimethylphenyl)imidazolium hexafluorophosphate IMes-HPF<sub>6</sub>**

<sup>1</sup>H NMR (400MHz, DMSO-*d*<sub>6</sub>)

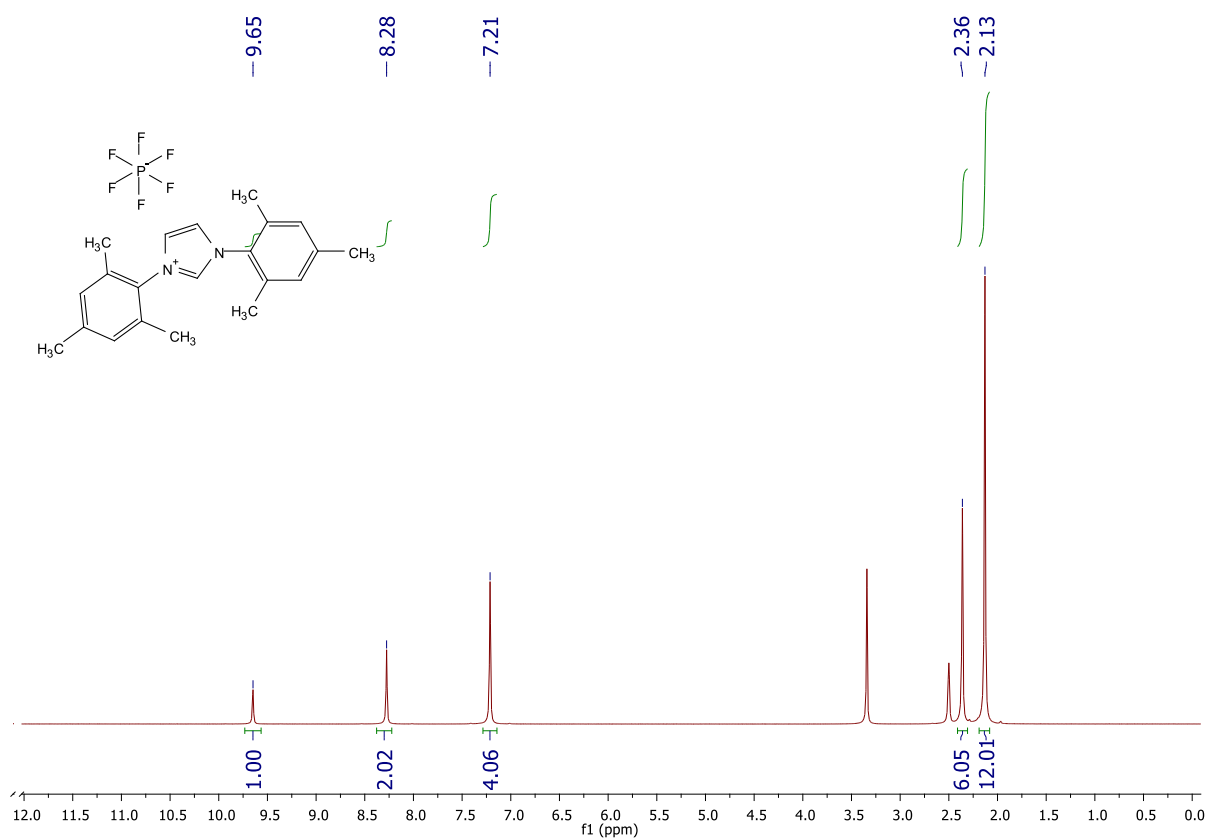

<sup>13</sup>C NMR (101 MHz, DMSO-*d*<sub>6</sub>)

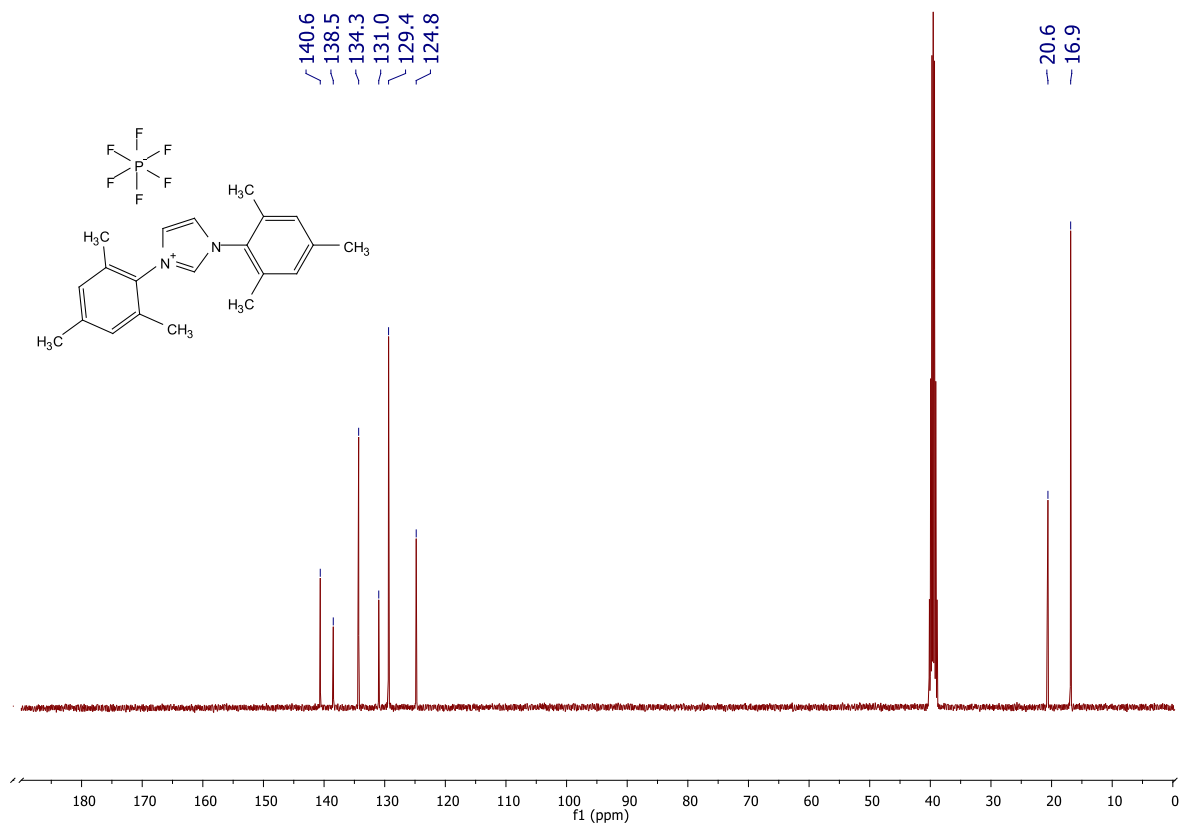

$^{31}\text{P}$  NMR (162 MHz,  $\text{DMSO}-d_6$ )

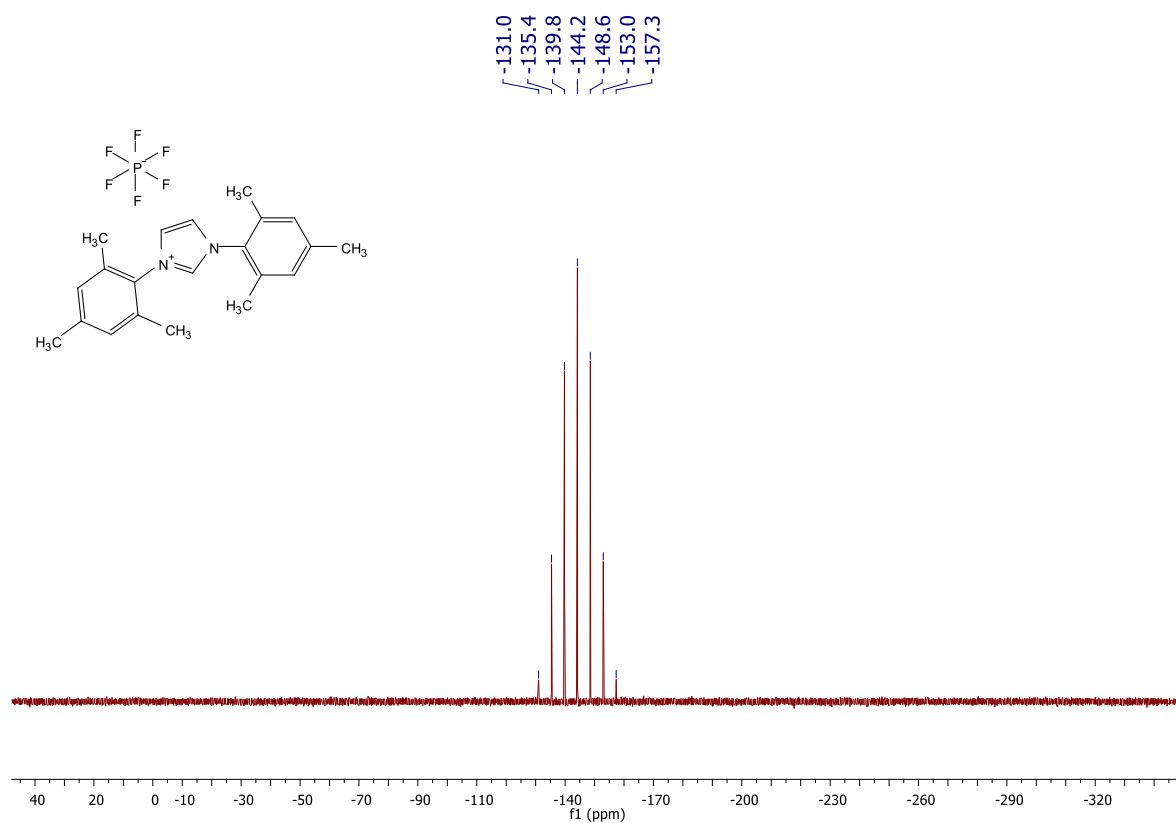

$^{19}\text{F}$  NMR (376 MHz,  $\text{DMSO}-d_6$ )

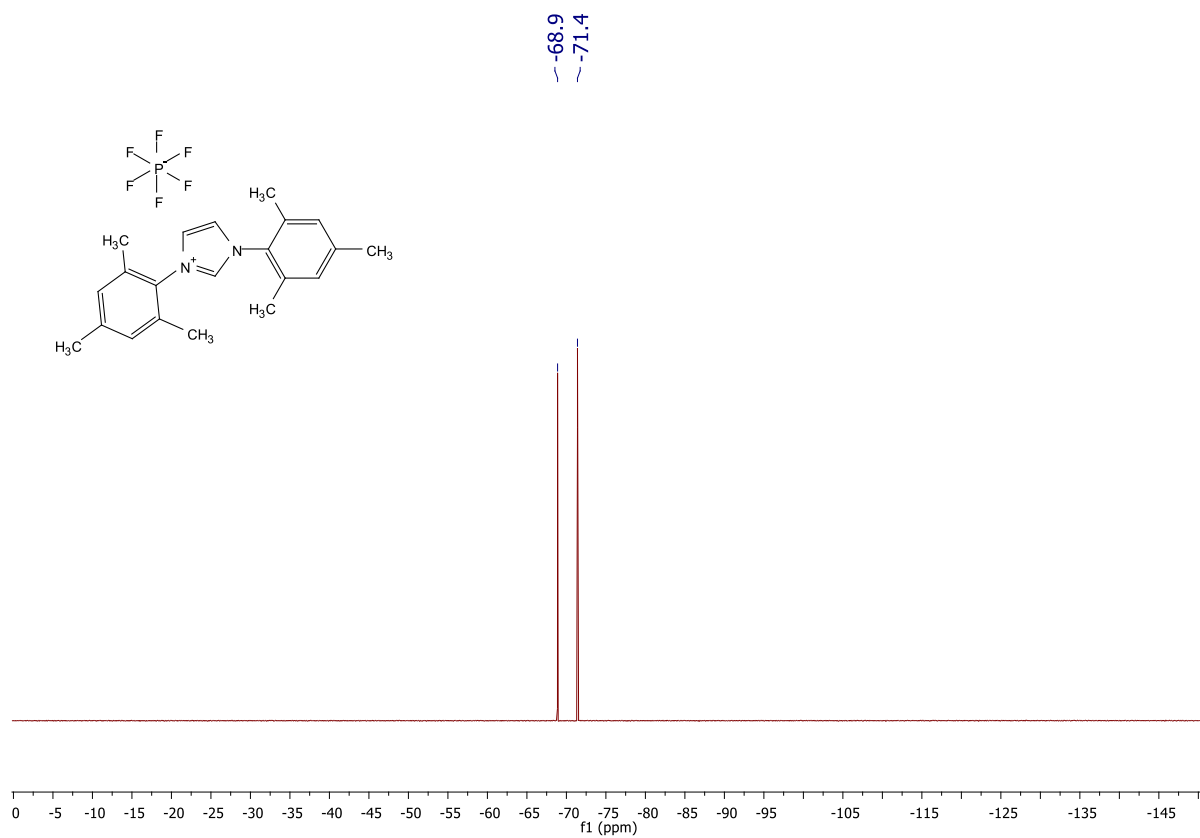

# **1,3-Bis-(2,6-diisopropylphenyl)imidazolium chloride IPr<sup>+</sup>·HCl**

<sup>1</sup>H NMR (400MHz, CDCl<sub>3</sub>)

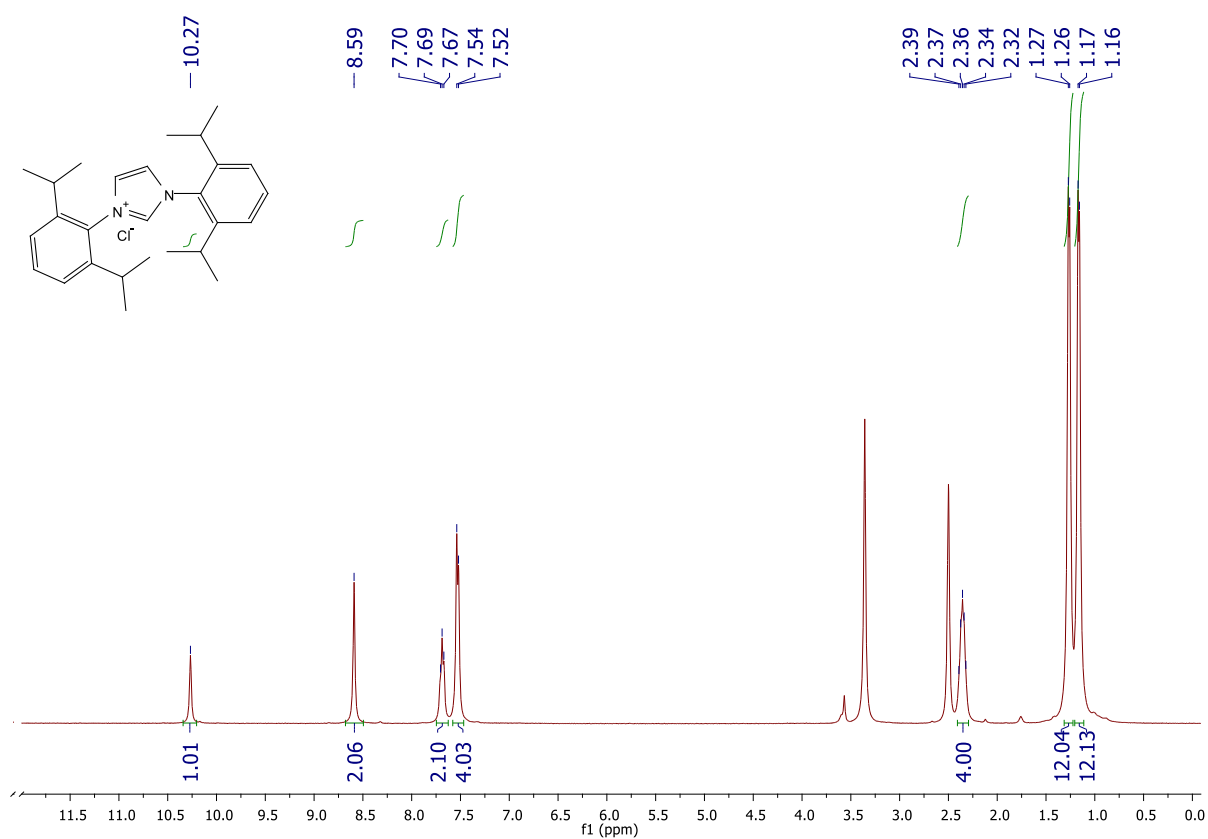

<sup>13</sup>C NMR (75 MHz, CDCl<sub>3</sub>)

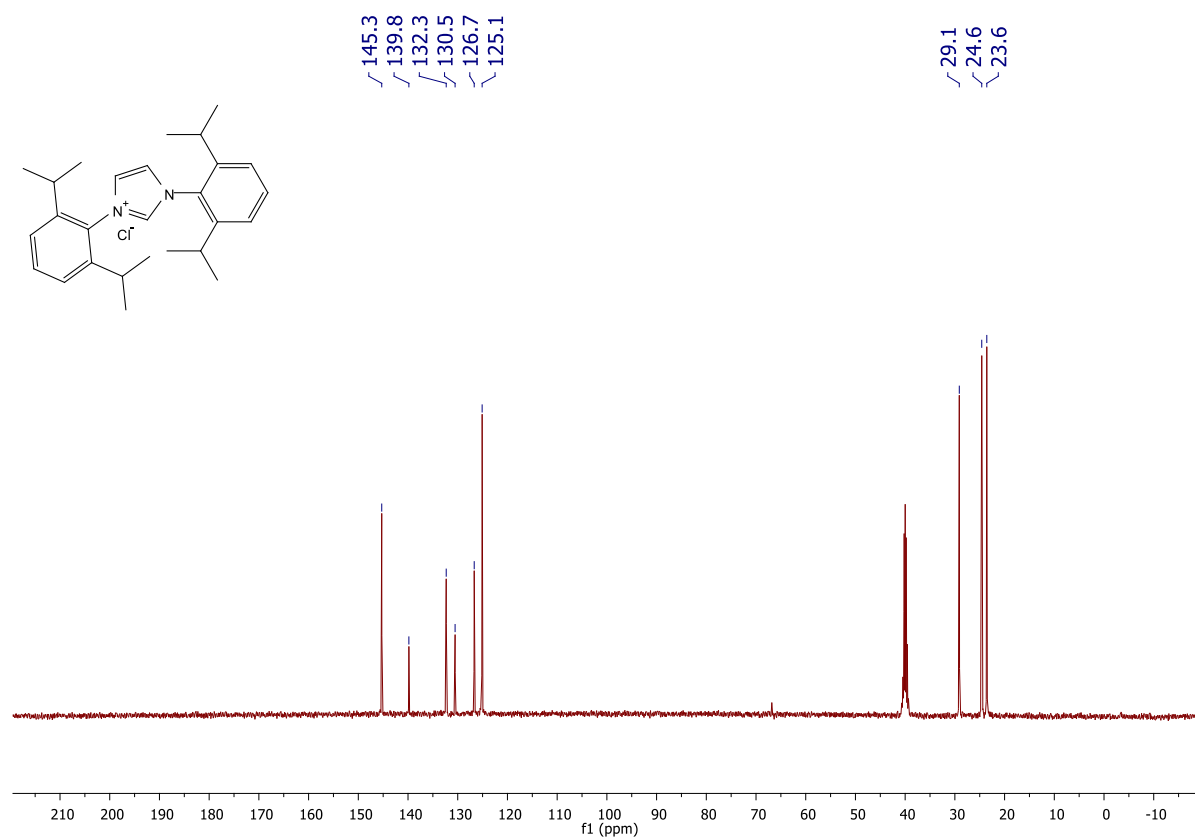

# **1,3-Bis-(2,6-diisopropylphenyl)imidazolium tetrafluoroborate IPr·HBF<sub>4</sub>**

<sup>1</sup>H NMR (400MHz, DMSO-d<sub>6</sub>)

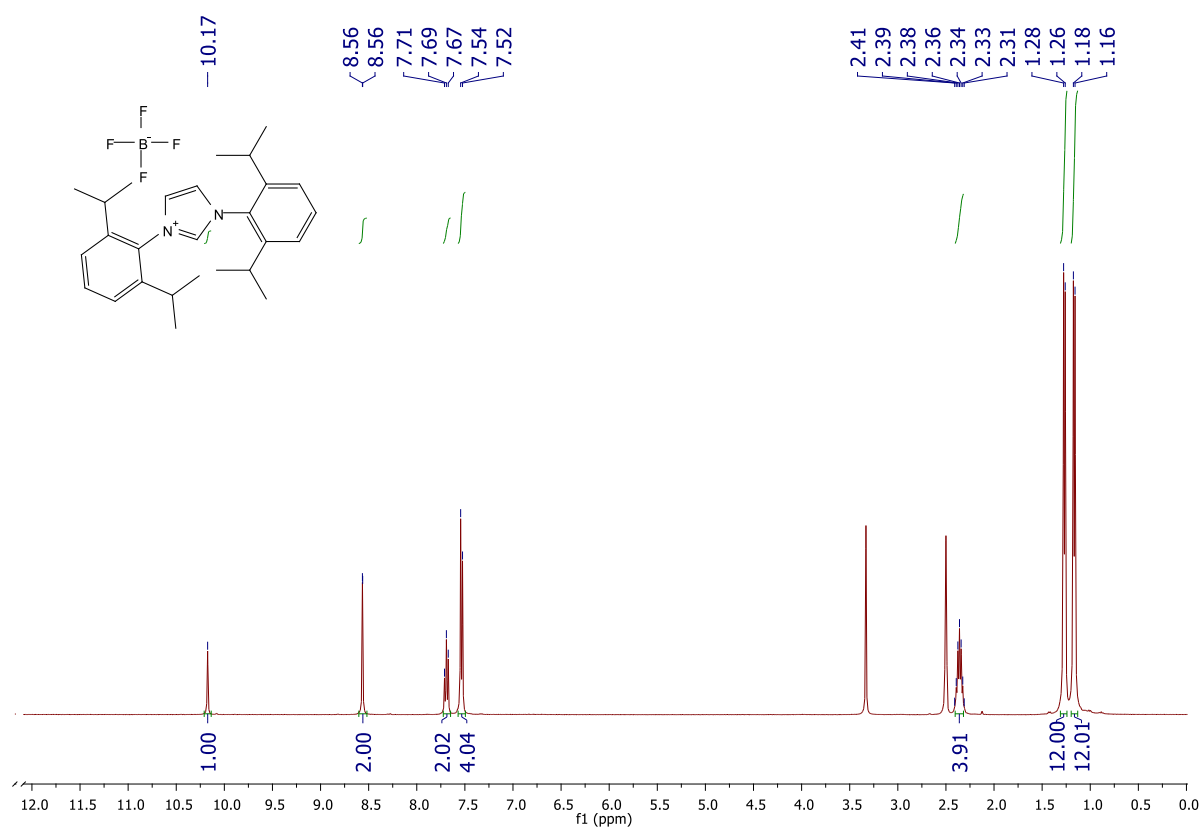

<sup>13</sup>C NMR (101 MHz, DMSO-d<sub>6</sub>)

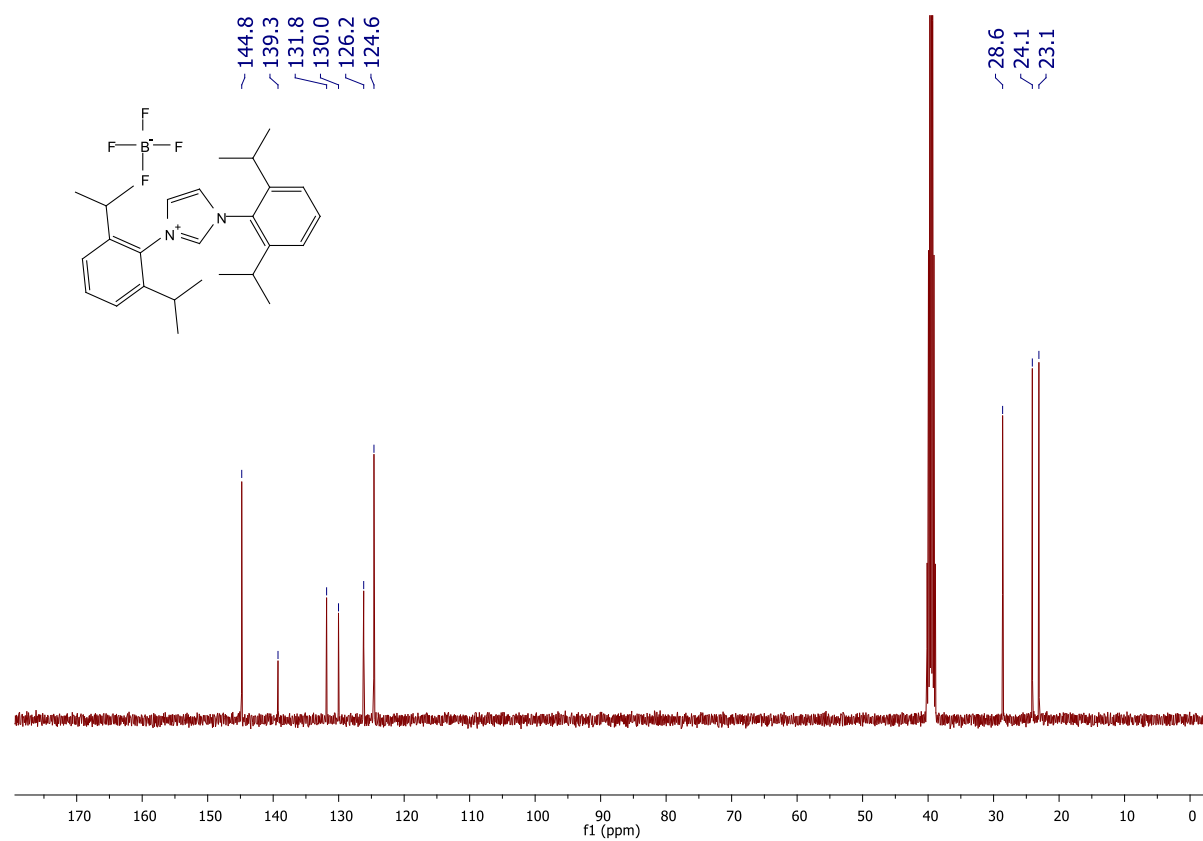

$^{19}\text{F}$  NMR (376 MHz, DMSO- $\text{d}_6$ )

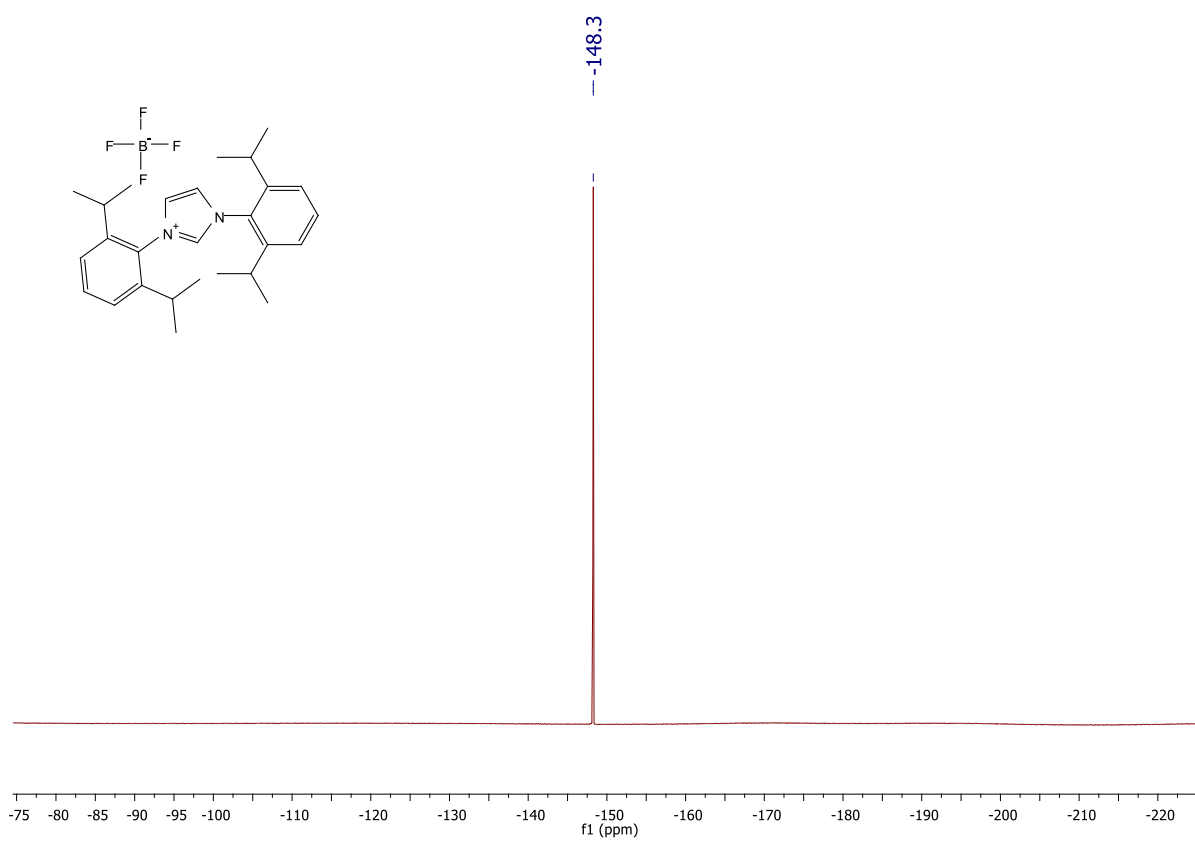

# **1,3-Bis-(2,6-diisopropylphenyl)imidazolium hexafluorophosphate IPr<sup>+</sup>·HPF<sub>6</sub><sup>-</sup>**

<sup>1</sup>H NMR (400MHz, DMSO-*d*<sub>6</sub>)

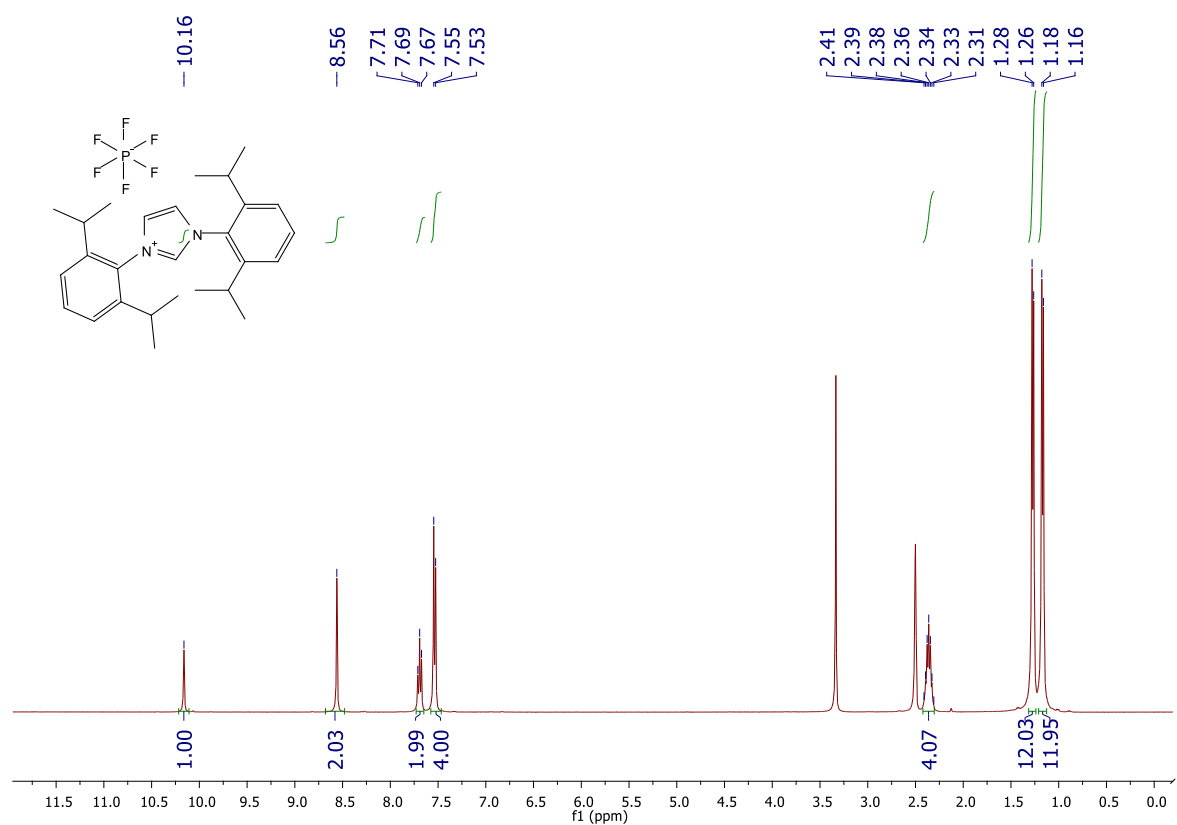

<sup>13</sup>C NMR (101 MHz, DMSO-*d*<sub>6</sub>)

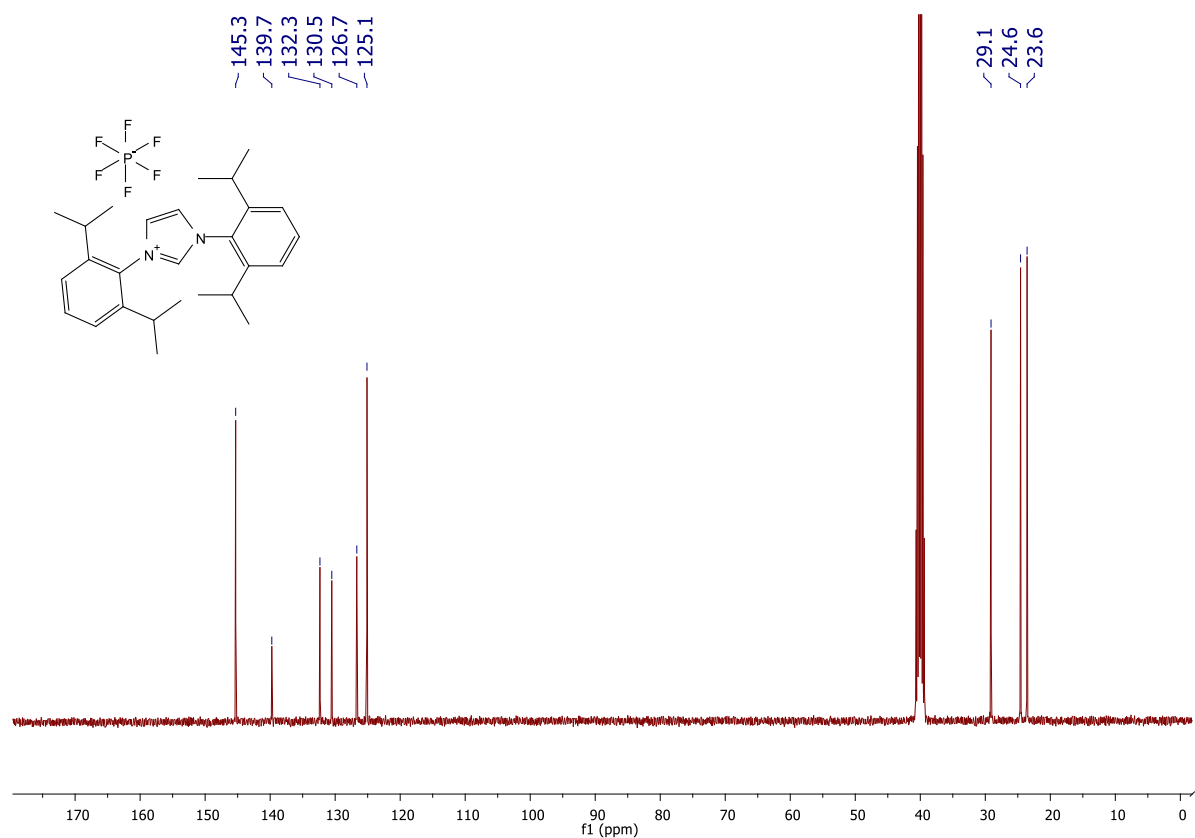



<sup>31</sup>P NMR (162 MHz, DMSO-*d*<sub>6</sub>)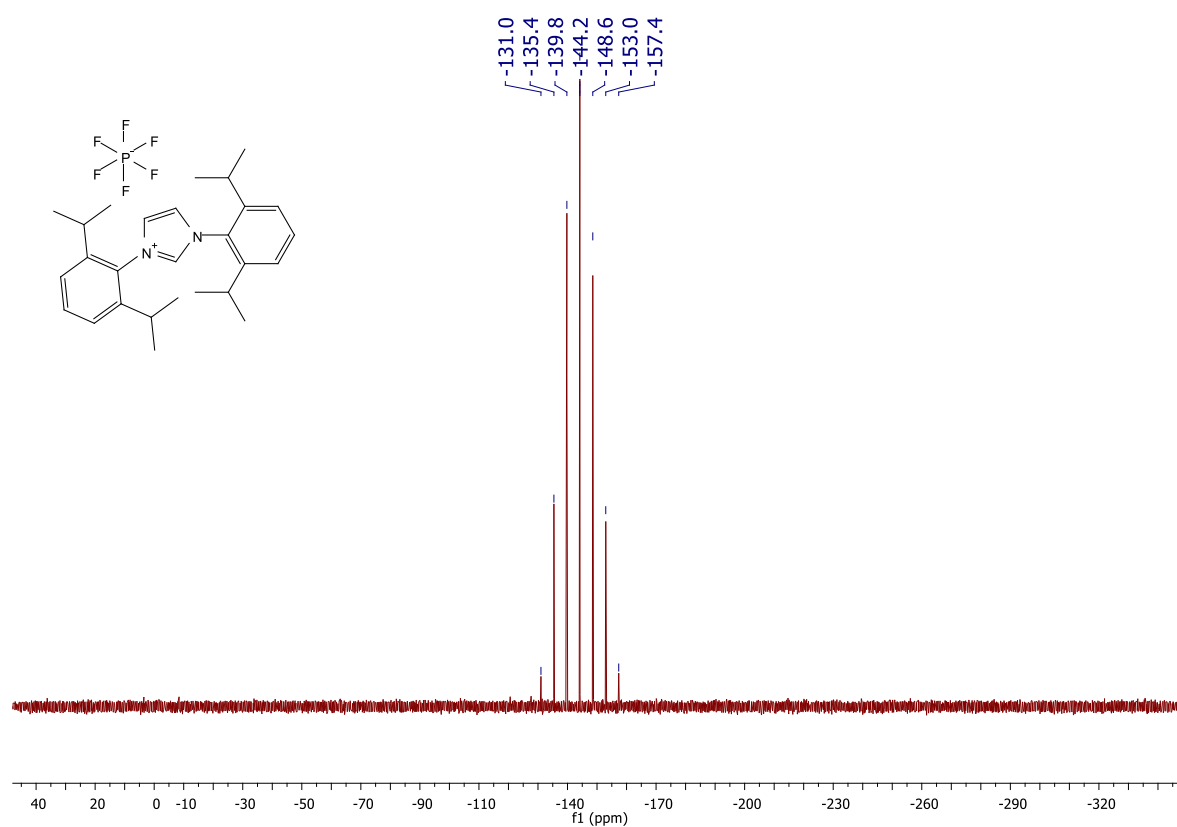<sup>19</sup>F NMR (376 MHz, DMSO-*d*<sub>6</sub>)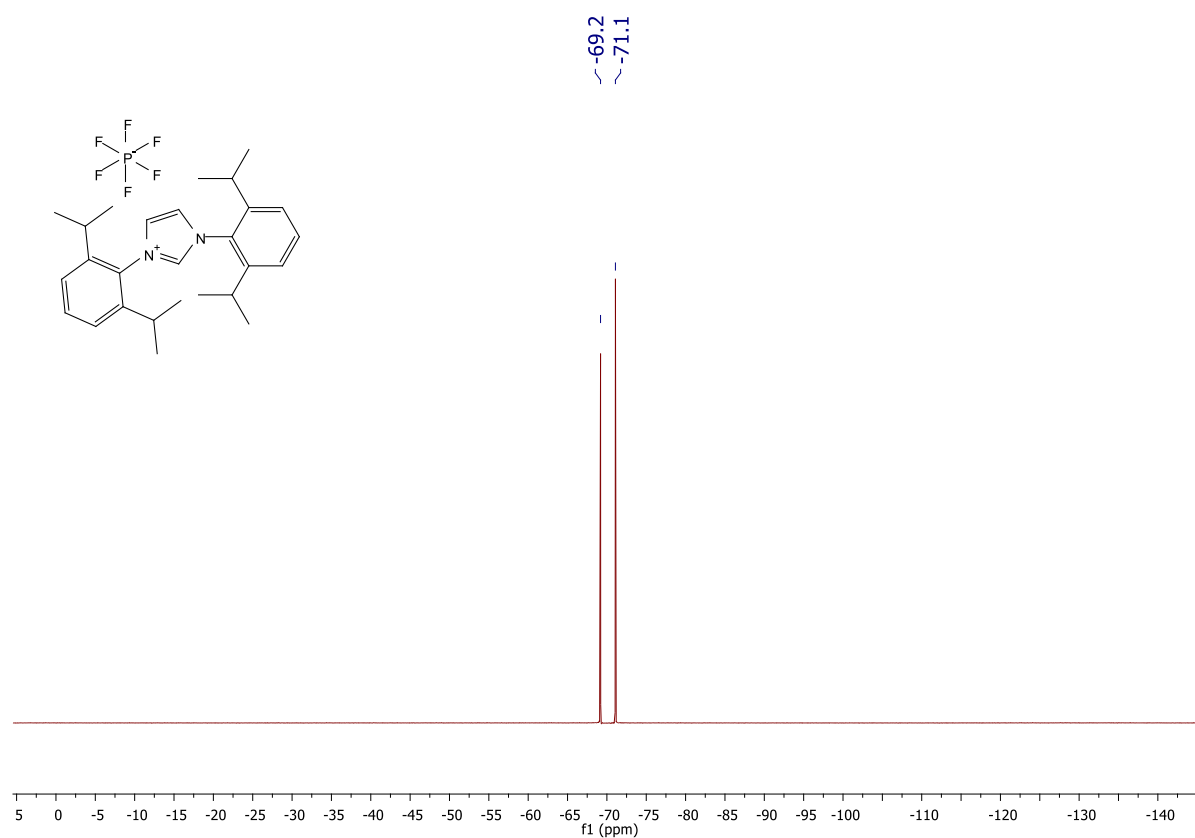

### 1,3-Dimesitylimidazolidinium chloride SIMes-HCl

$^1\text{H}$  NMR (400MHz,  $\text{CDCl}_3$ )

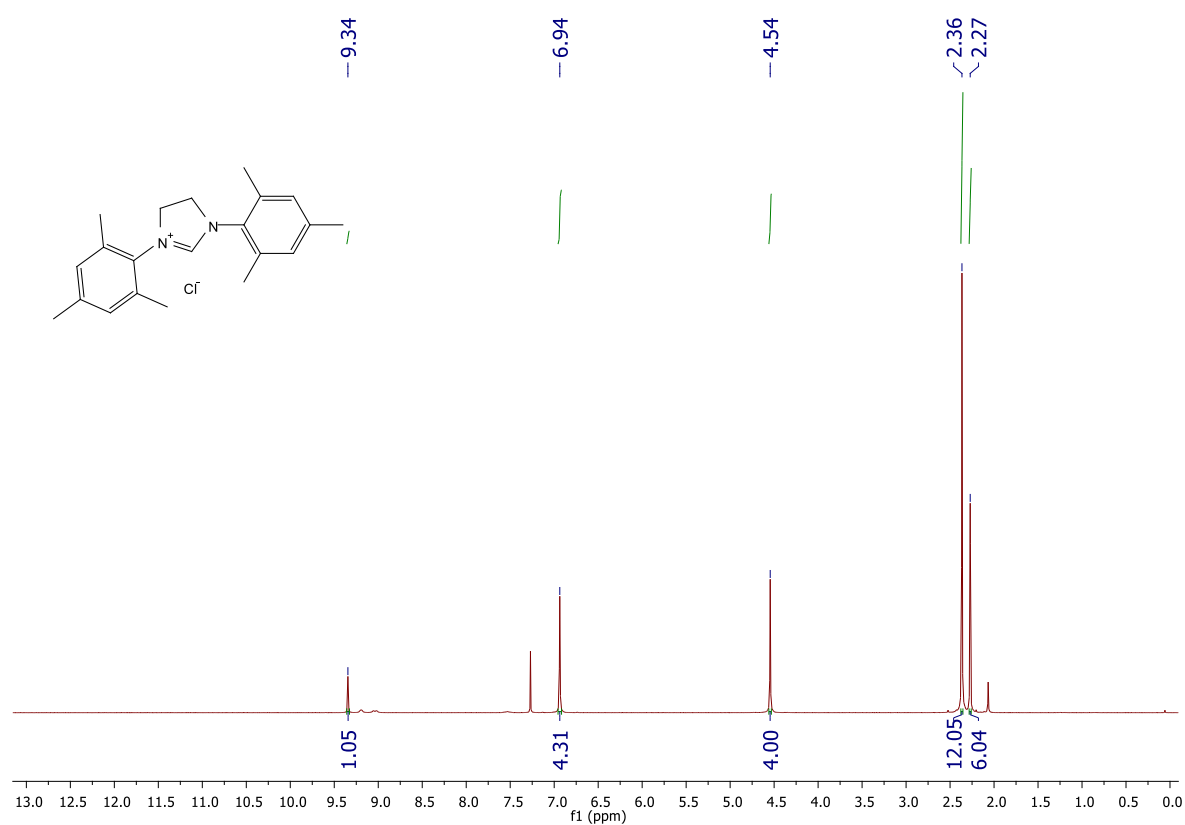

$^{13}\text{C}$  NMR (101 MHz,  $\text{CDCl}_3$ )

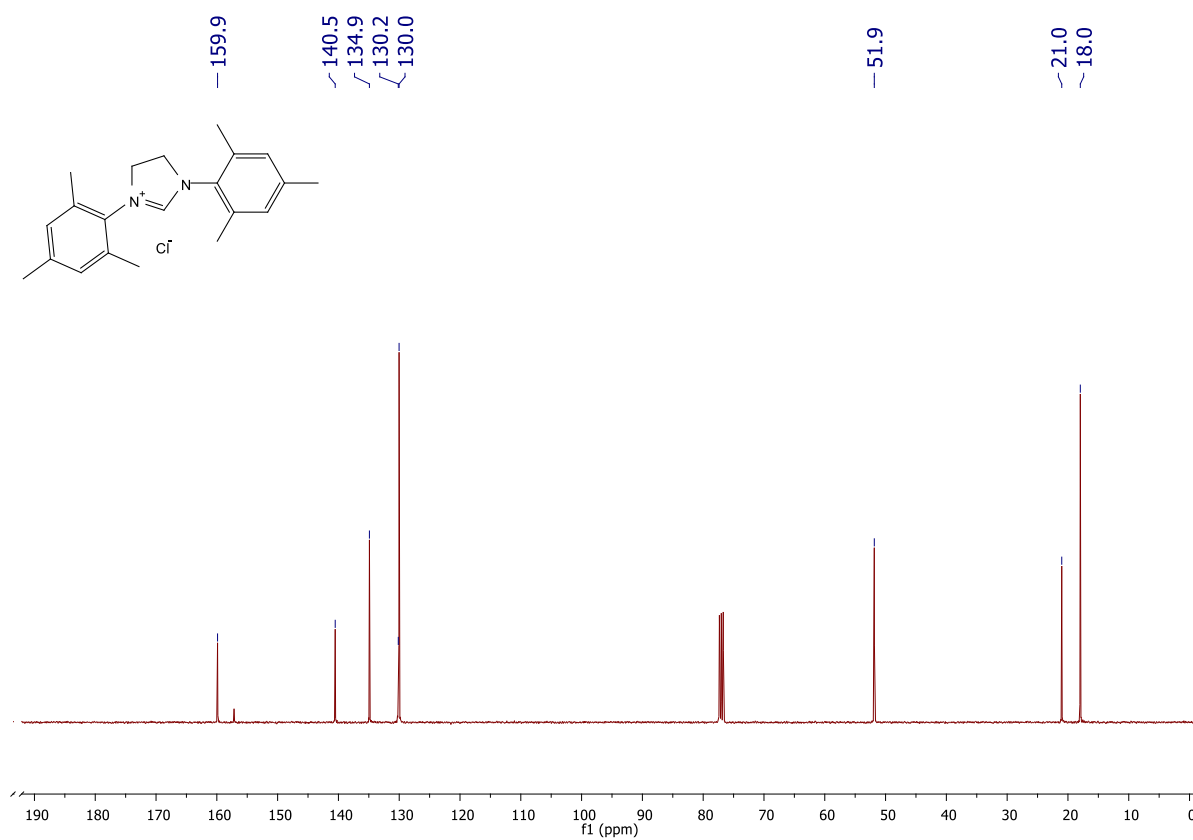

# **1,3-Bis(2,6-diisopropylphenyl)imidazolidinium chloride SIPr·HCl**

<sup>1</sup>H NMR (400MHz, CDCl<sub>3</sub>)

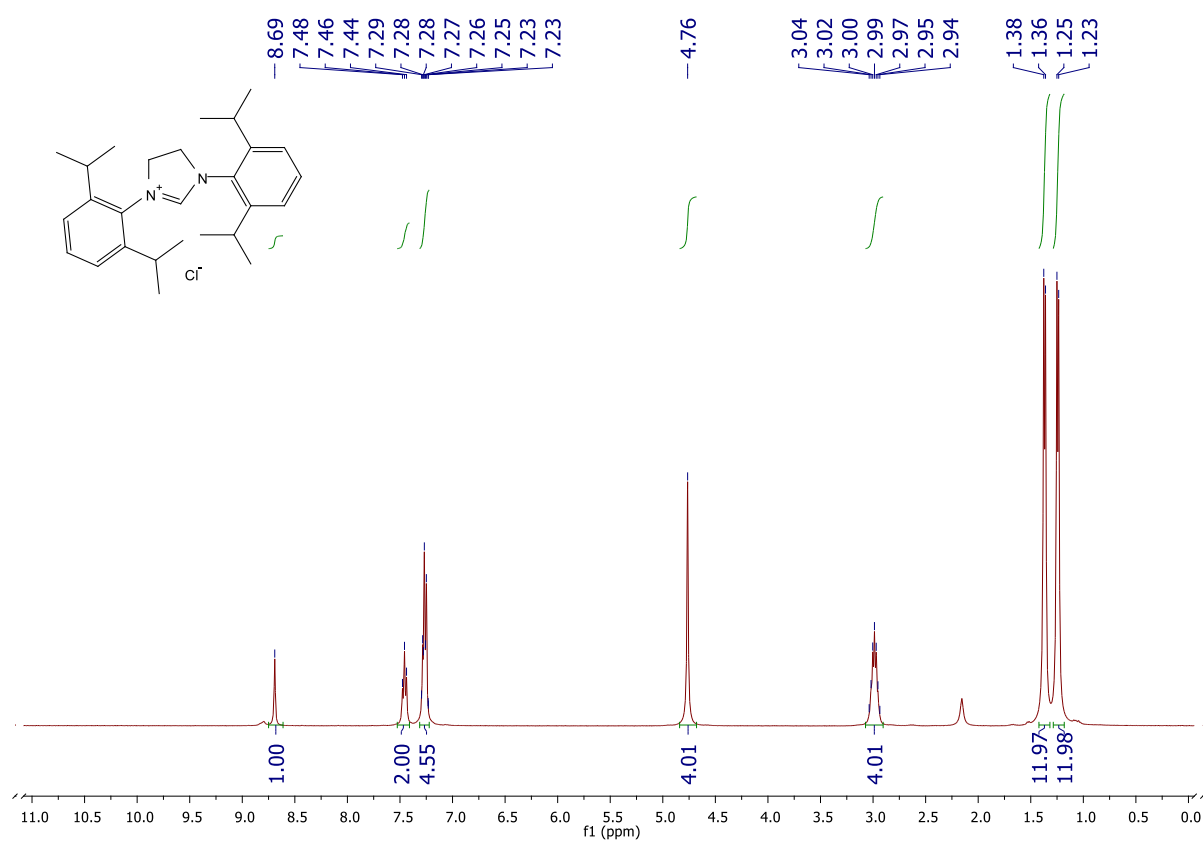

<sup>13</sup>C NMR (101 MHz, CDCl<sub>3</sub>)

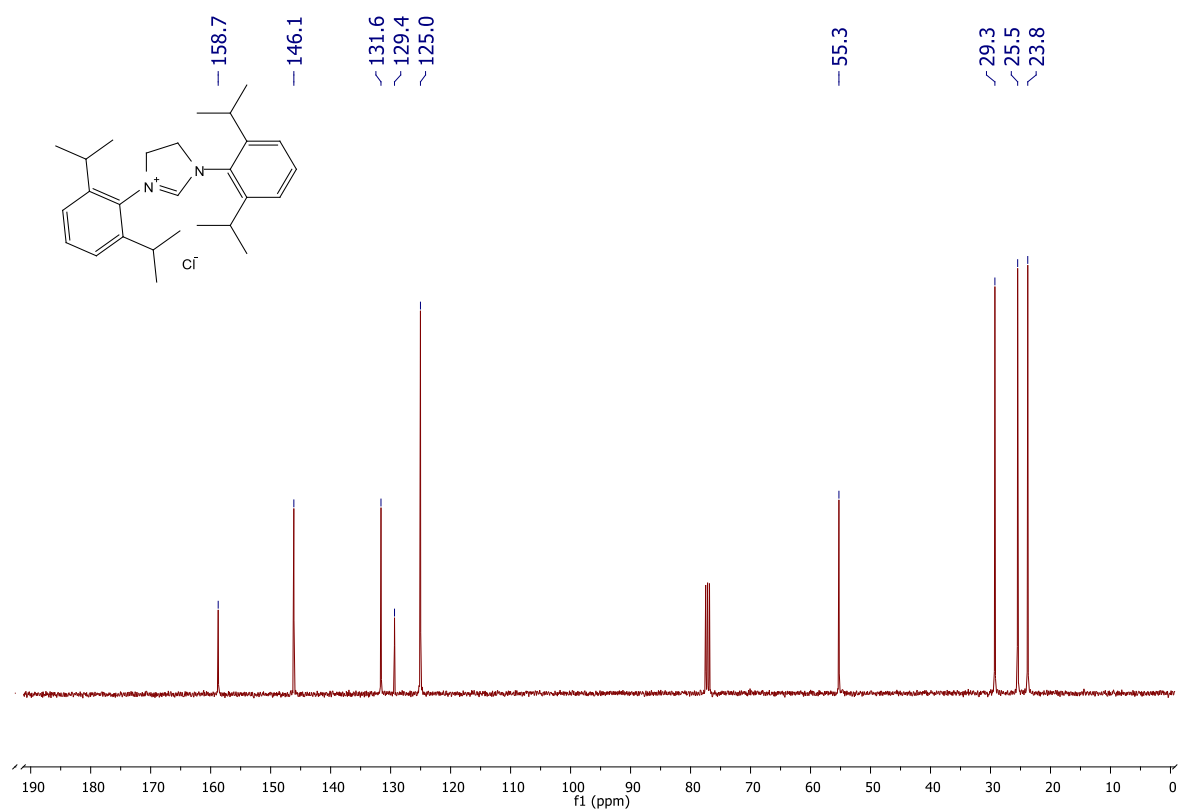

**[1,3-Bis(2,4,6-trimethylphenyl)-4,5-dimethyl]imidazolium chloride IMes<sup>Me</sup>·HCl**

<sup>1</sup>H NMR (400MHz, CDCl<sub>3</sub>)

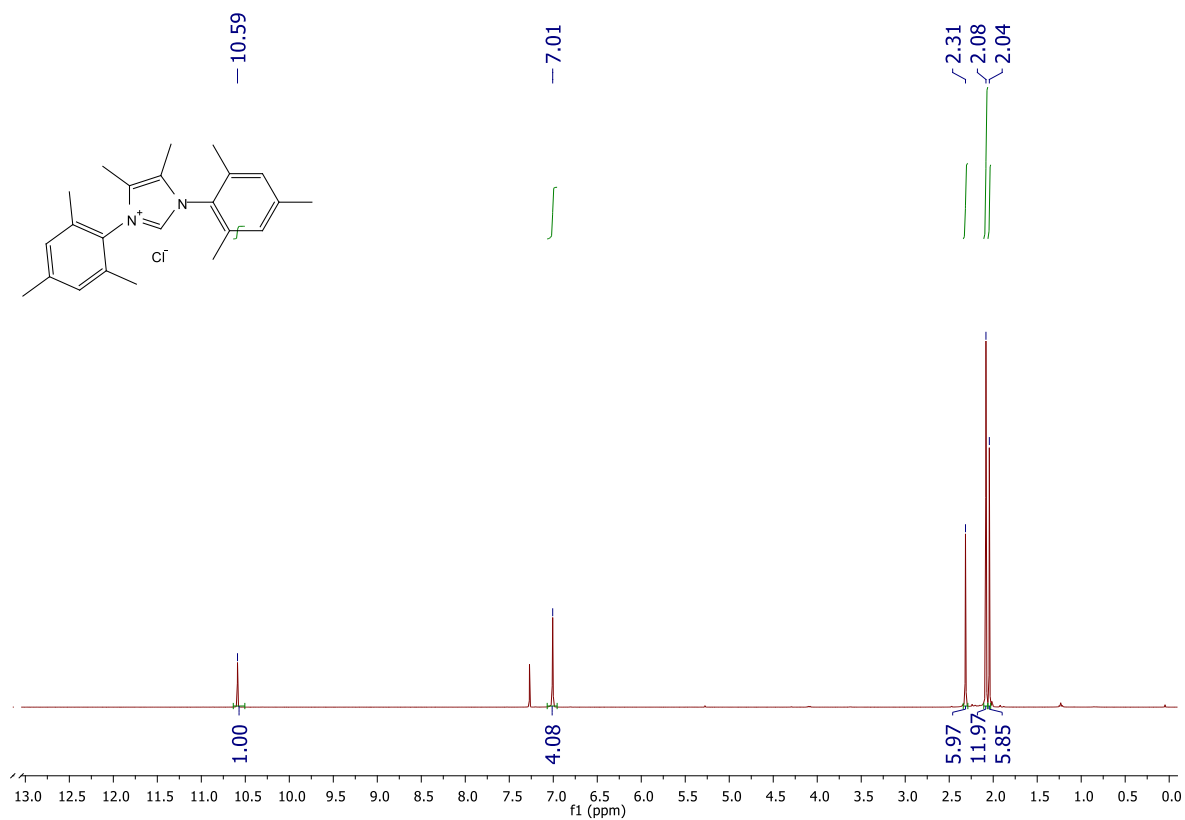

<sup>13</sup>C NMR (101 MHz, CDCl<sub>3</sub>)

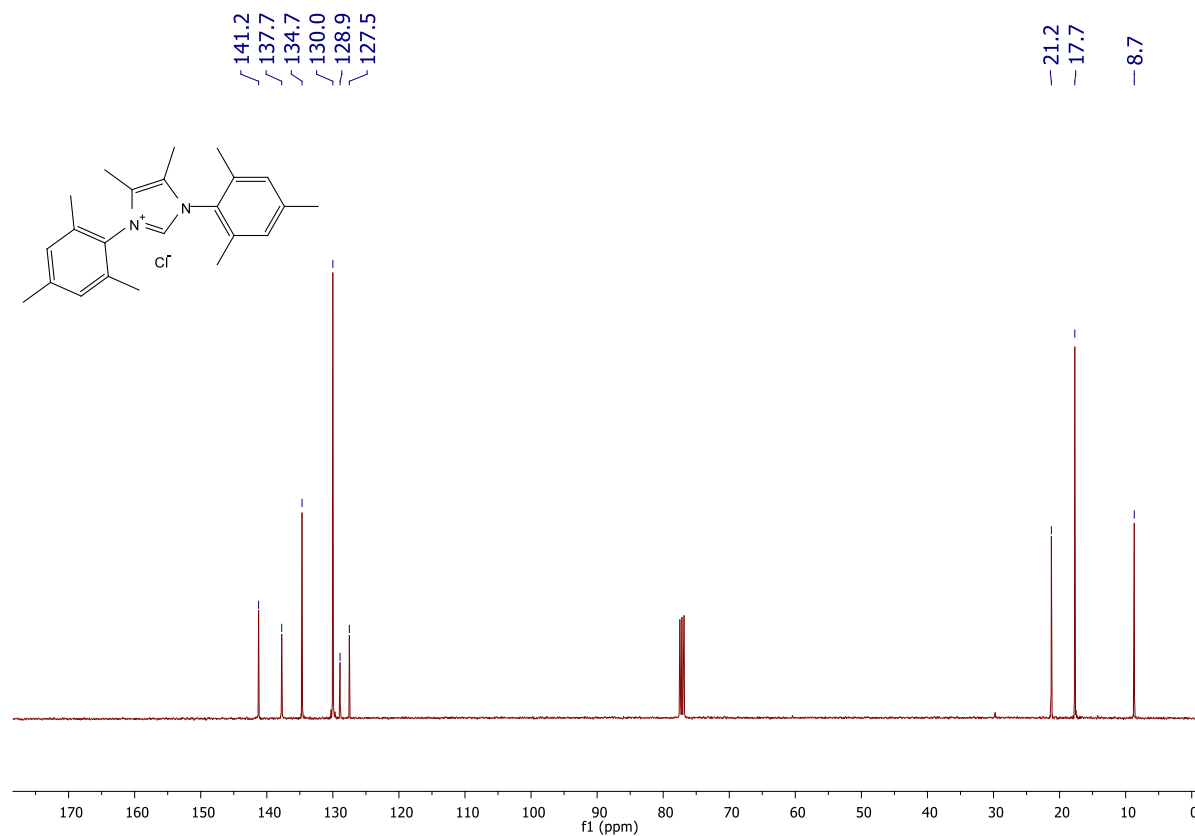

**[1,3-Bis(2,4,6-trimethylphenyl)-4,5-dimethyl]imidazolium tetrafluoroborate IMes<sup>Me</sup>·HBF<sub>4</sub>**

<sup>1</sup>H NMR (400MHz, DMSO-*d*<sub>6</sub>)

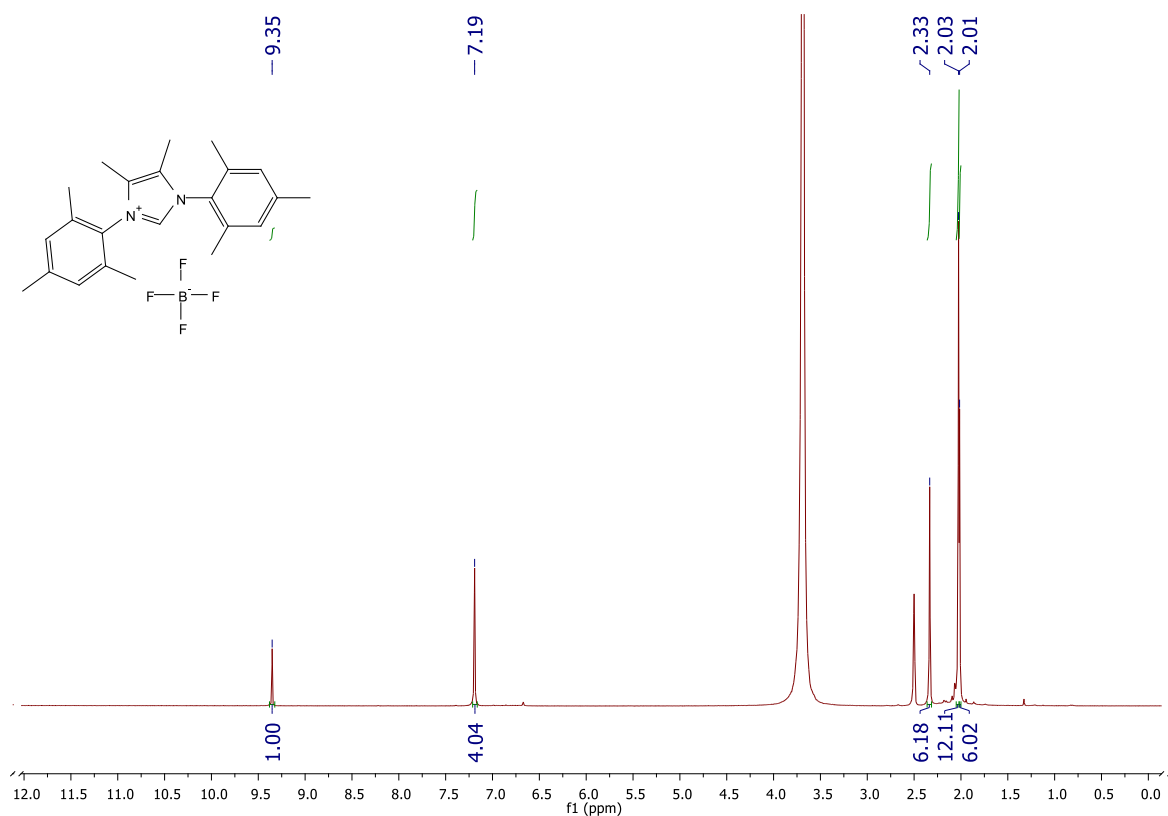

<sup>13</sup>C NMR (101 MHz, DMSO-*d*<sub>6</sub>)

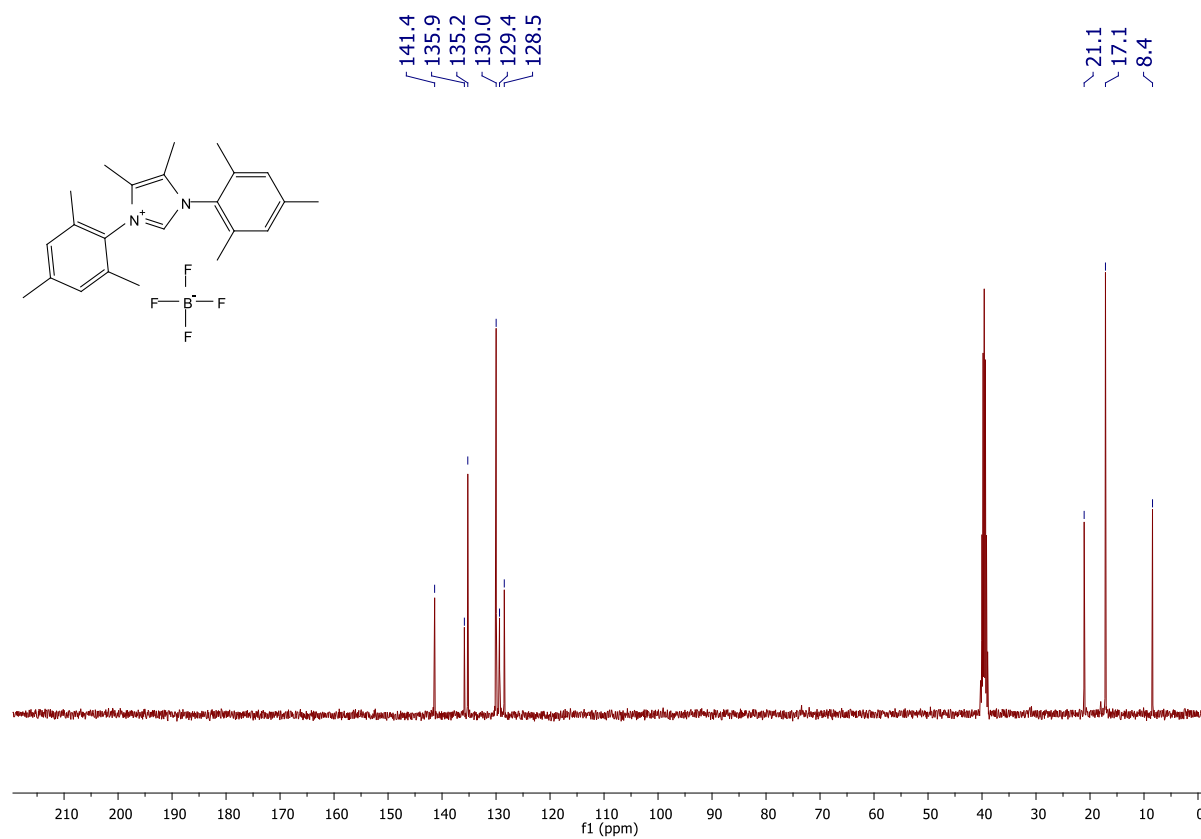

$^{19}\text{F}$  NMR (376 MHz,  $\text{DMSO-}d_6$ )

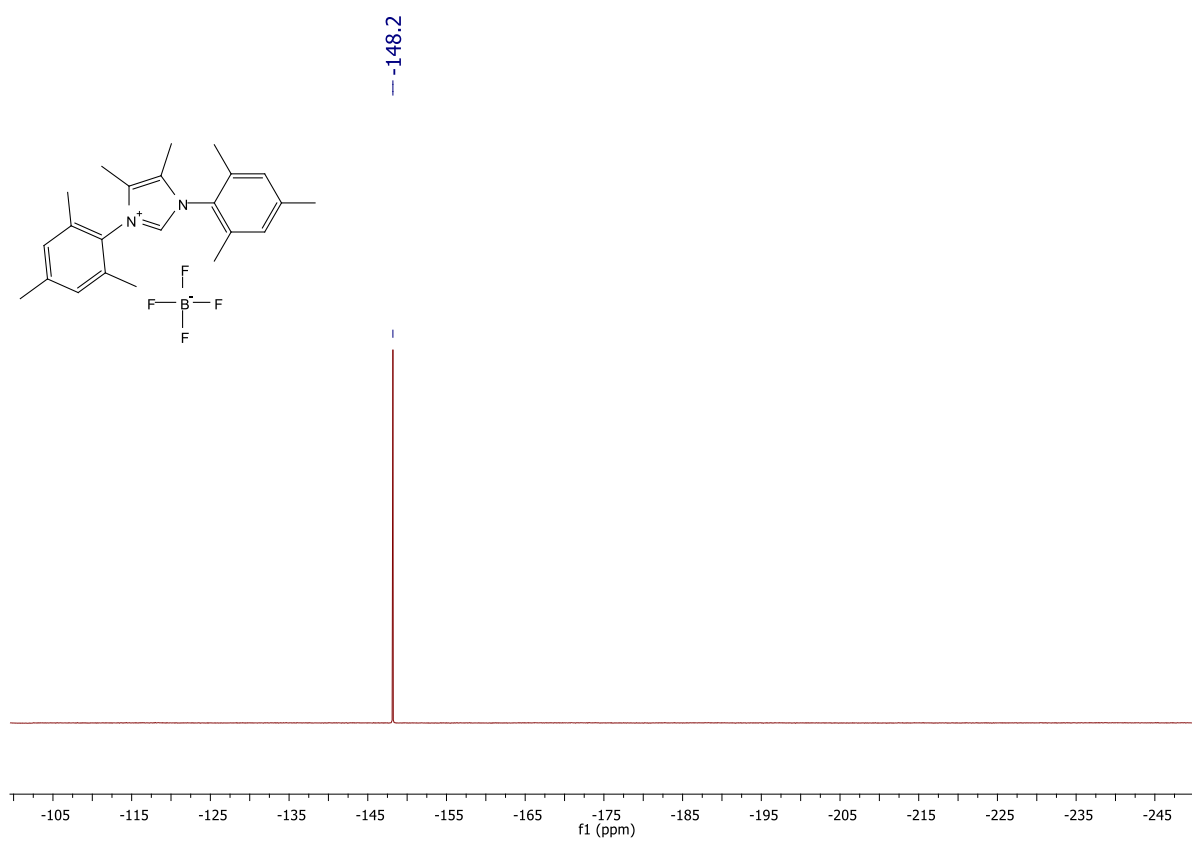

**[1,3-Bis(2,4,6-trimethylphenyl)-4,5-dimethyl]imidazolium hexafluorophosphate IMes<sup>Me</sup>·HPF<sub>6</sub>**  
<sup>1</sup>H NMR (400MHz, DMSO-*d*<sub>6</sub>)

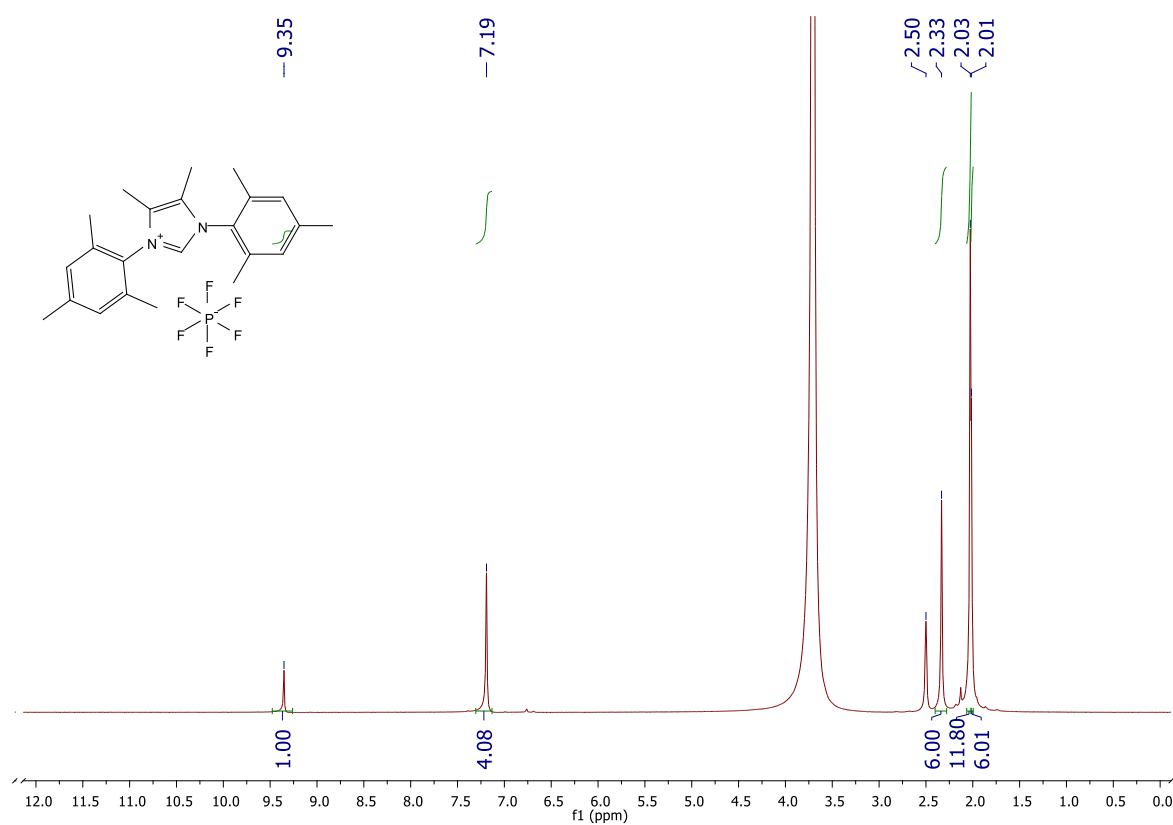

<sup>13</sup>C NMR (101 MHz, DMSO-*d*<sub>6</sub>)

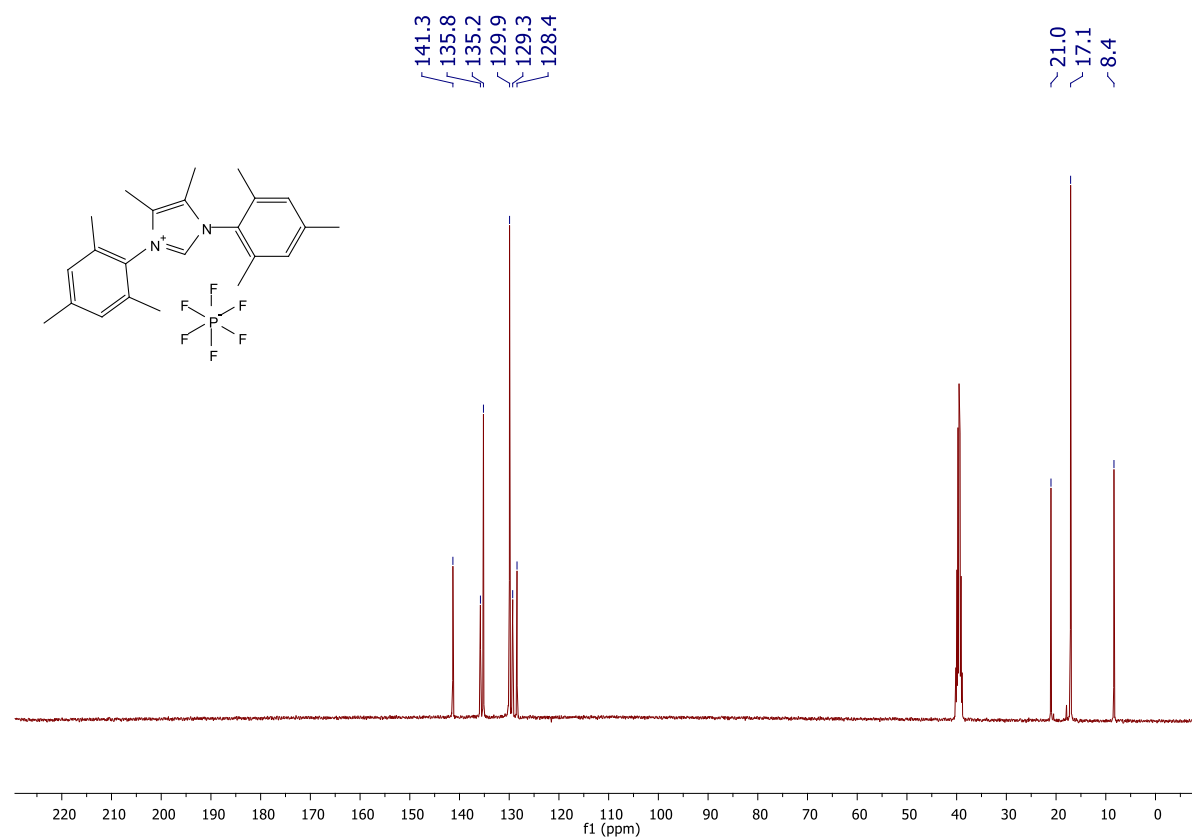

$^{31}\text{P}$  NMR (162 MHz,  $\text{DMSO}-d_6$ )

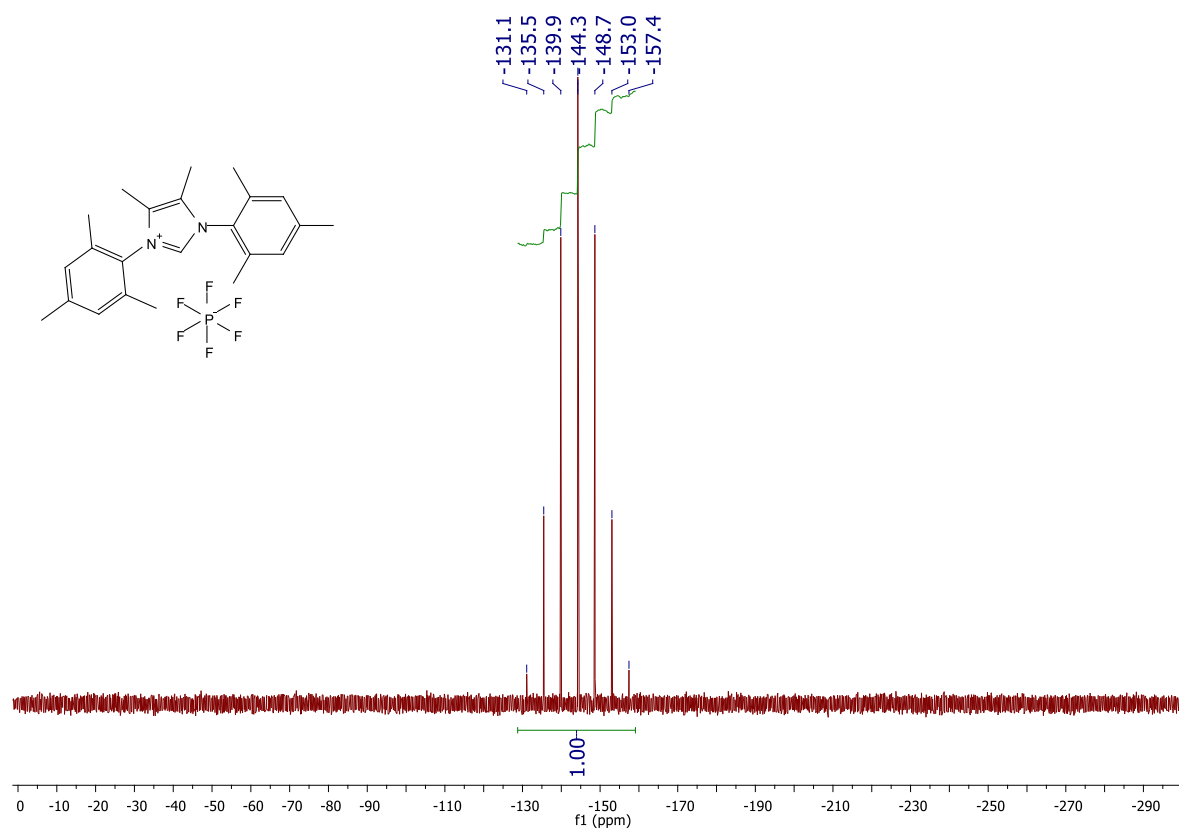

$^{19}\text{F}$  NMR (376 MHz,  $\text{DMSO}-d_6$ )

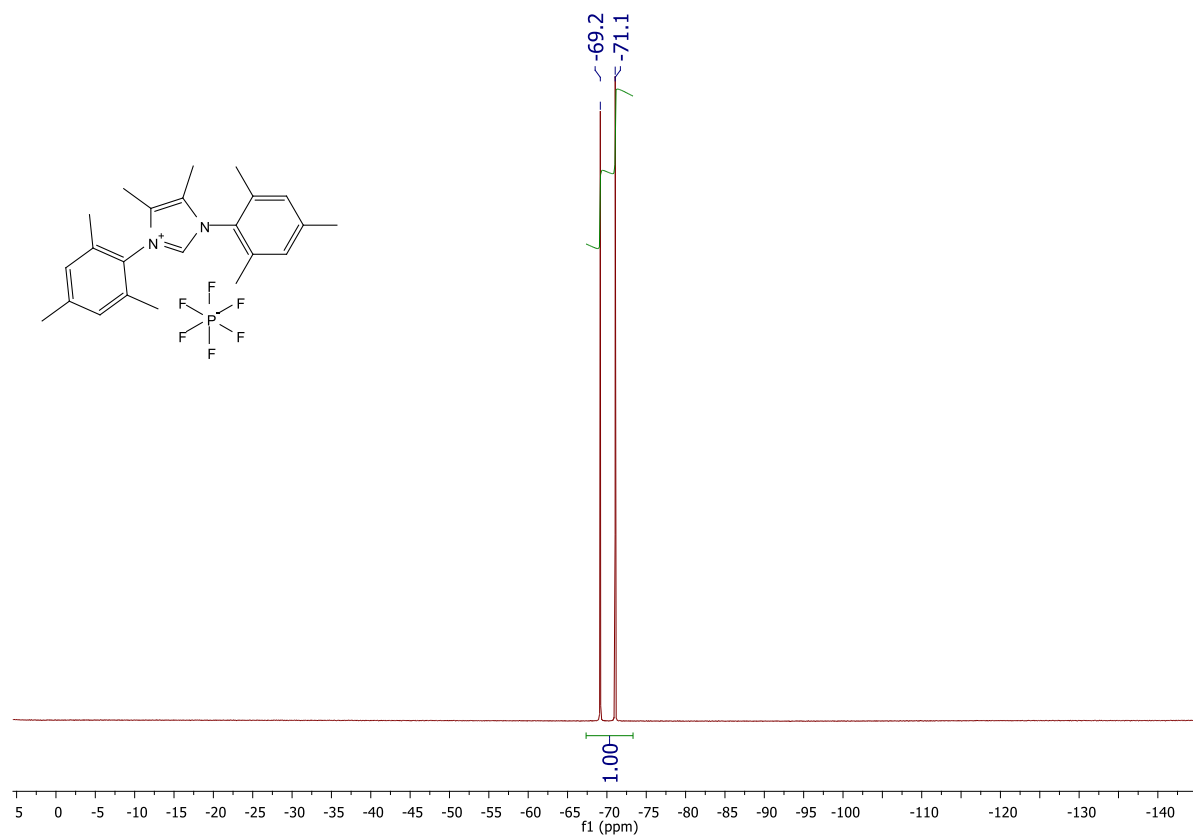



**[1,3-Bis(2,6-diisopropylphenyl)-4,5-dimethyl]imidazolium chloride IPr<sup>Me</sup>·HCl**

<sup>1</sup>H NMR (400MHz, DMSO-d<sub>6</sub>)

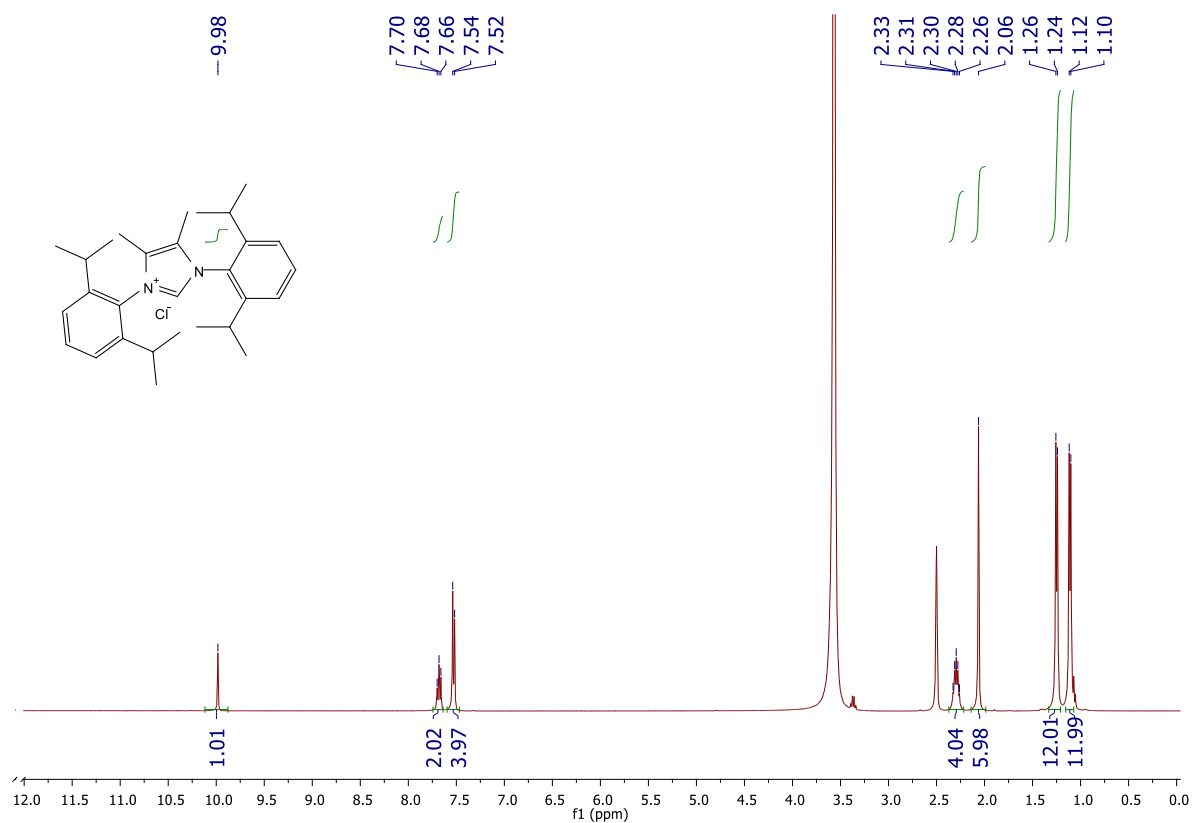

<sup>13</sup>C NMR (101 MHz, DMSO-d<sub>6</sub>)

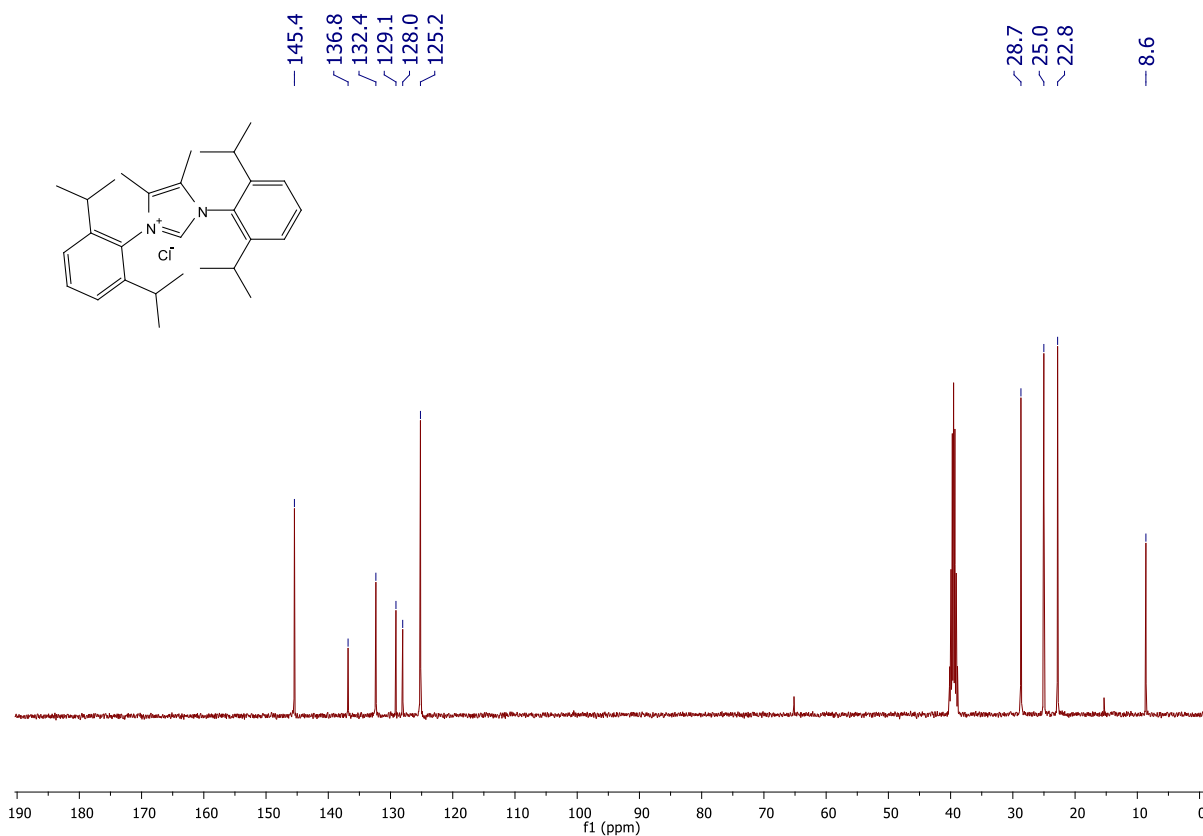

**[1,3-Bis(2,6-diisopropylphenyl)-4,5-dimethylimidazolium tetrafluoroborate IPr<sup>Me</sup>·HBF<sub>4</sub>**

<sup>1</sup>H NMR (400MHz, DMSO-d<sub>6</sub>)

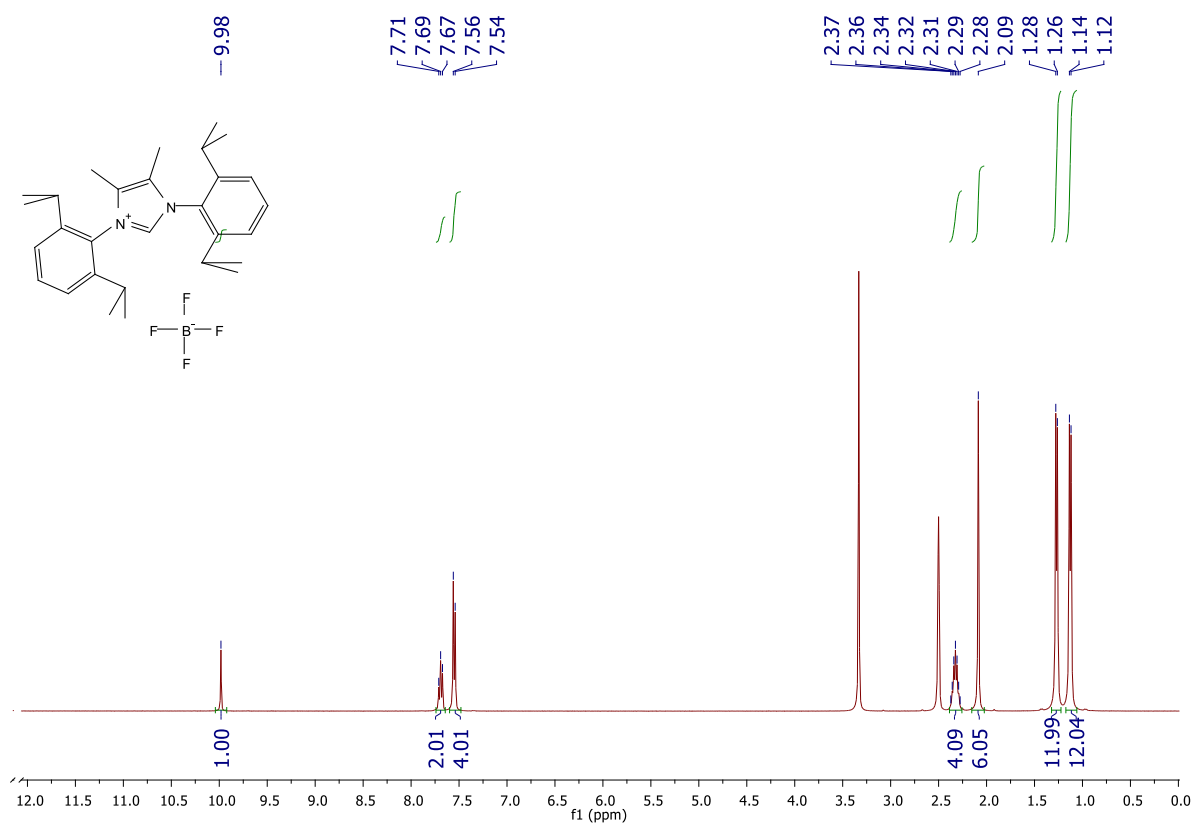

<sup>13</sup>C NMR (101 MHz, DMSO-d<sub>6</sub>)

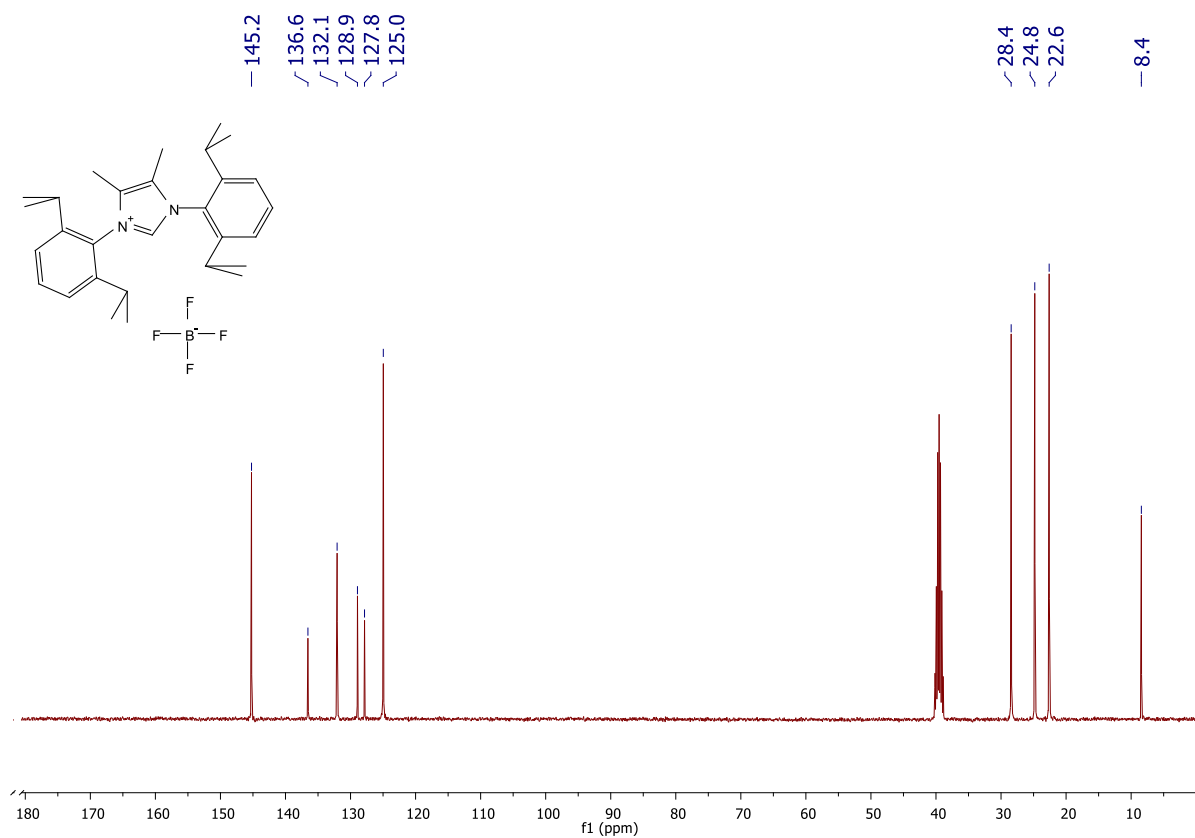

$^{19}\text{F}$  NMR (376 MHz,  $\text{DMSO-}d_6$ )

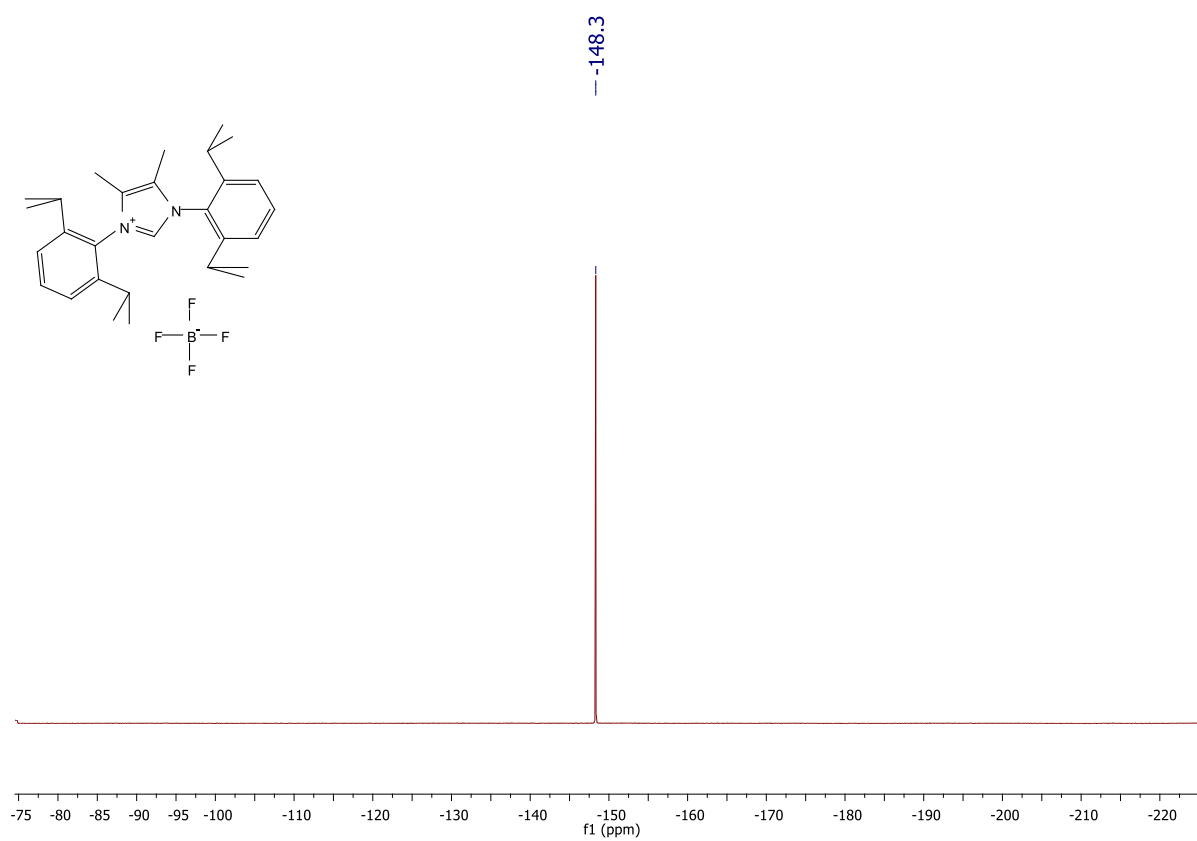

**[1,3-Bis(2,6-diisopropylphenyl)-4,5-dimethylimidazolium hexafluorophosphate IPr<sup>Me</sup>·HPF<sub>6</sub>**

<sup>1</sup>H NMR (400MHz, DMSO-*d*<sub>6</sub>)

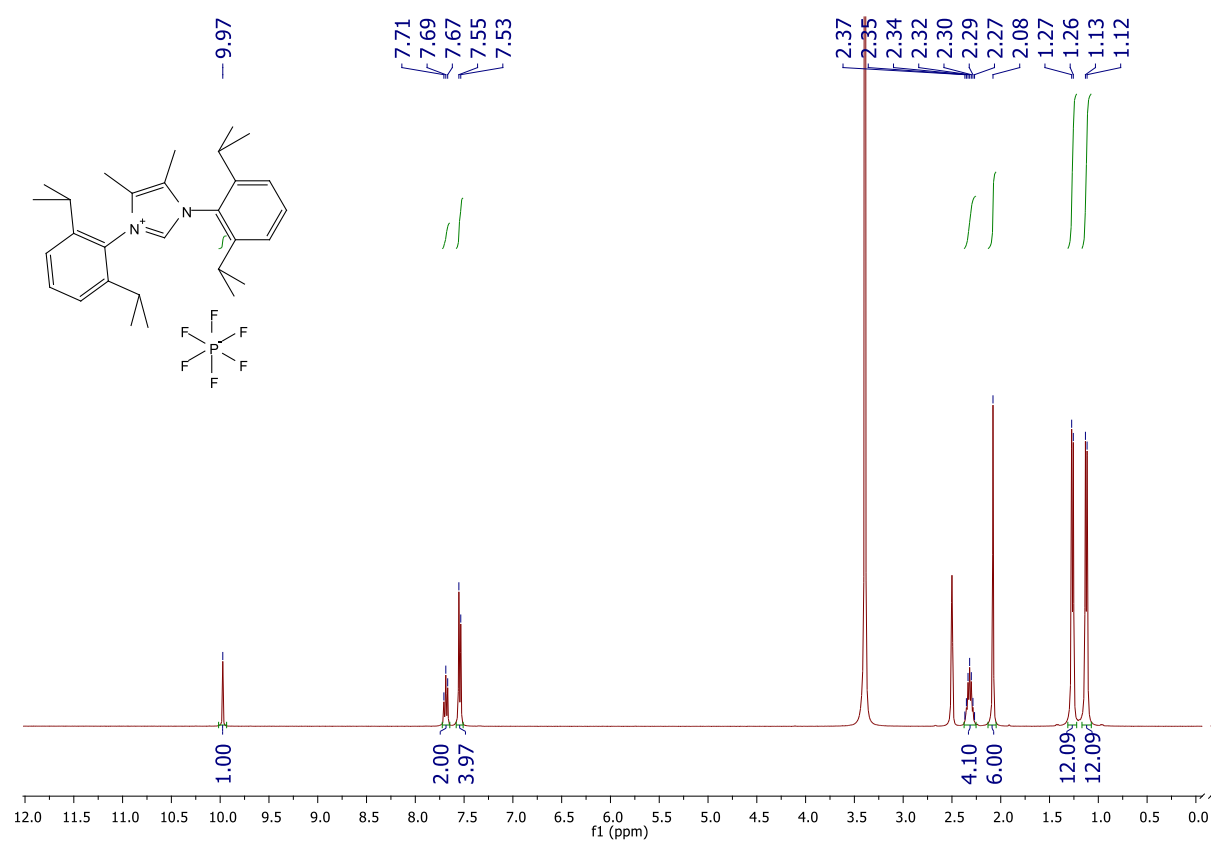

<sup>13</sup>C NMR (101 MHz, DMSO-*d*<sub>6</sub>)

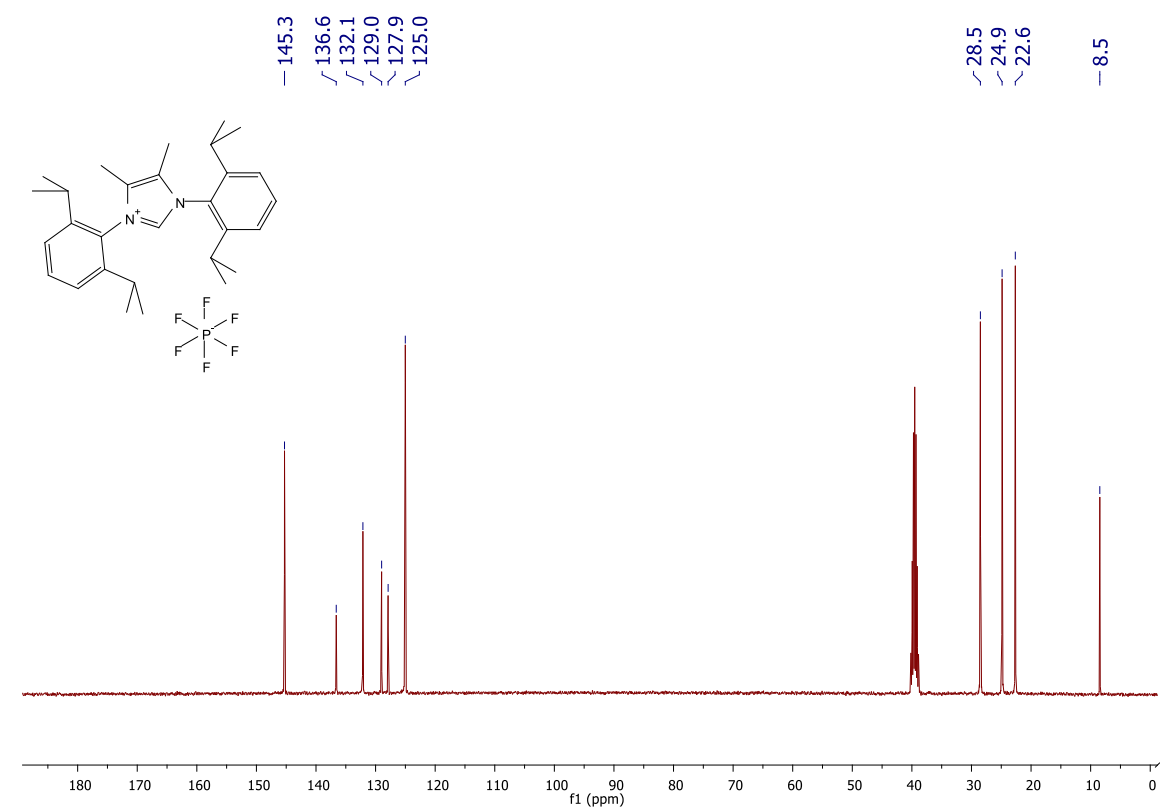

$^{31}\text{P}$  NMR (162 MHz,  $\text{DMSO-}d_6$ )

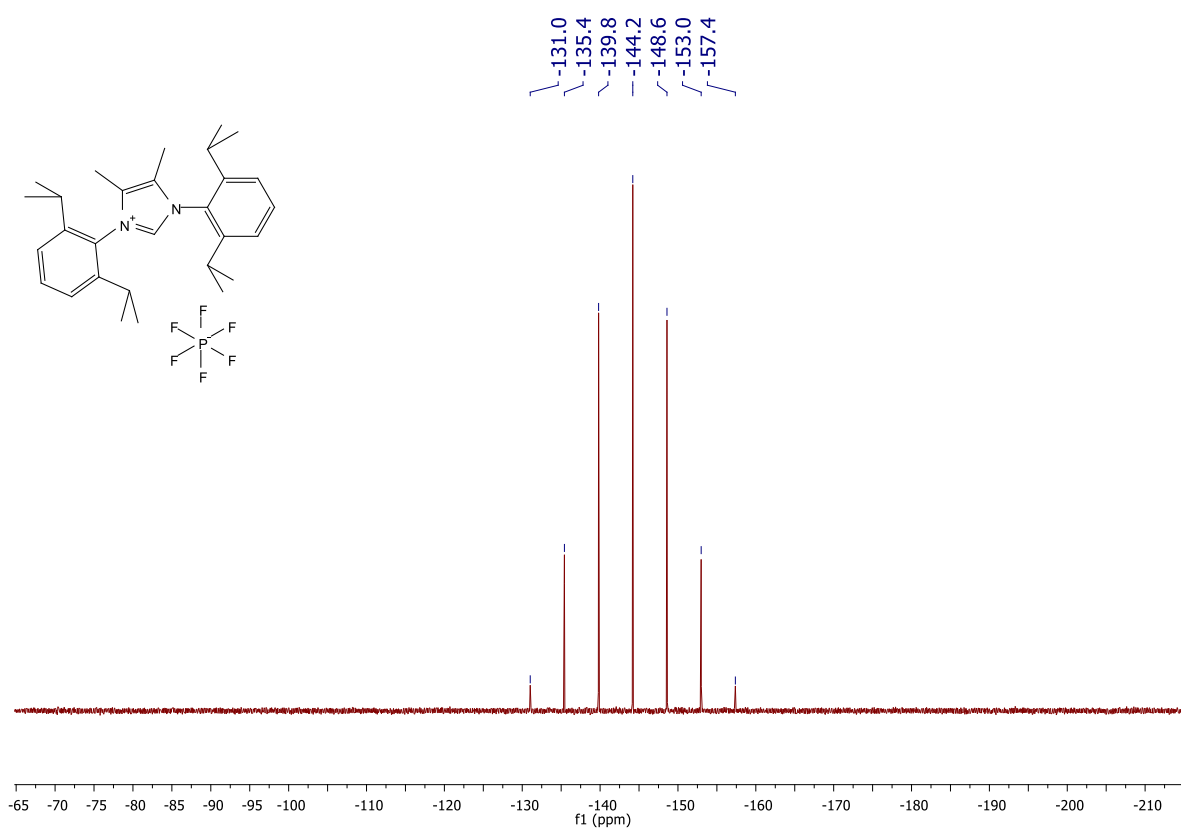

$^{19}\text{F}$  NMR (376 MHz,  $\text{DMSO-}d_6$ )

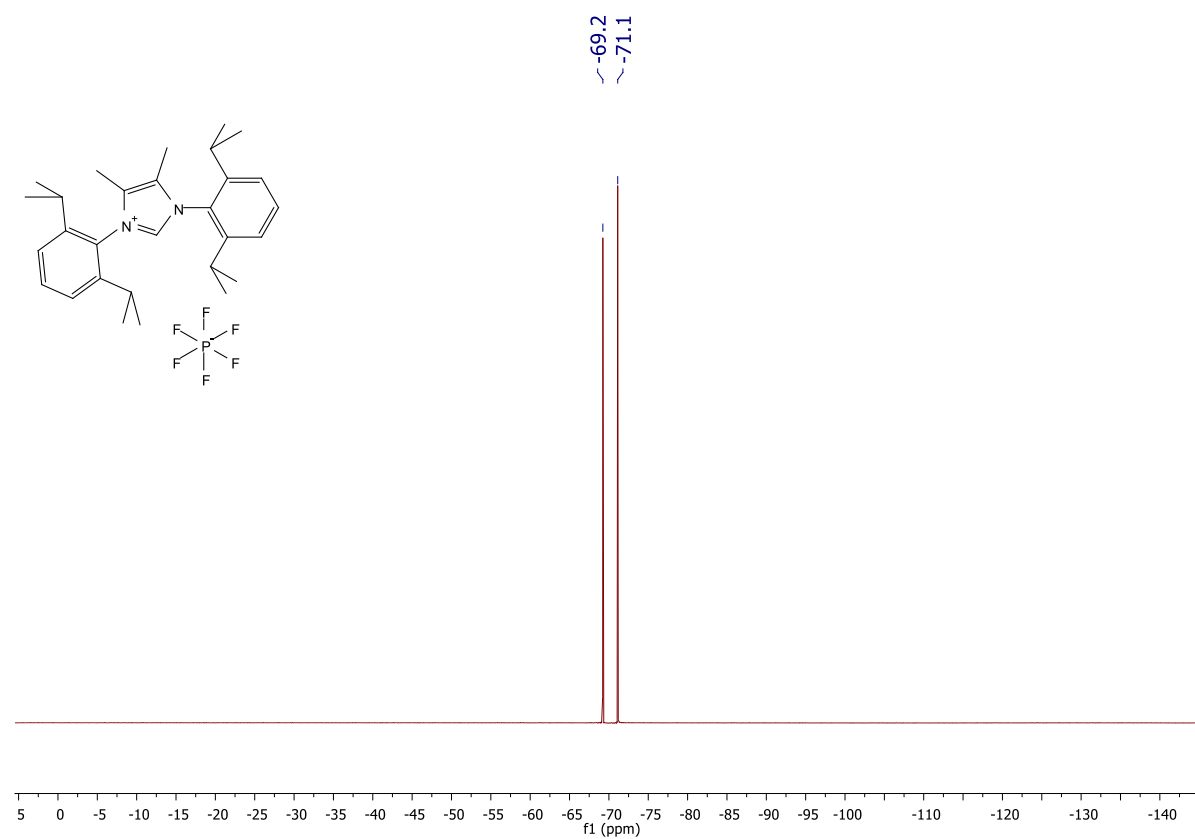

**[1,3-Bis(2,4,6-trimethylphenyl)-4,5-cis-dimethyl]imidazolidinium chloride SIMes<sup>Me</sup>·HCl**

<sup>1</sup>H NMR (400MHz, CDCl<sub>3</sub>)

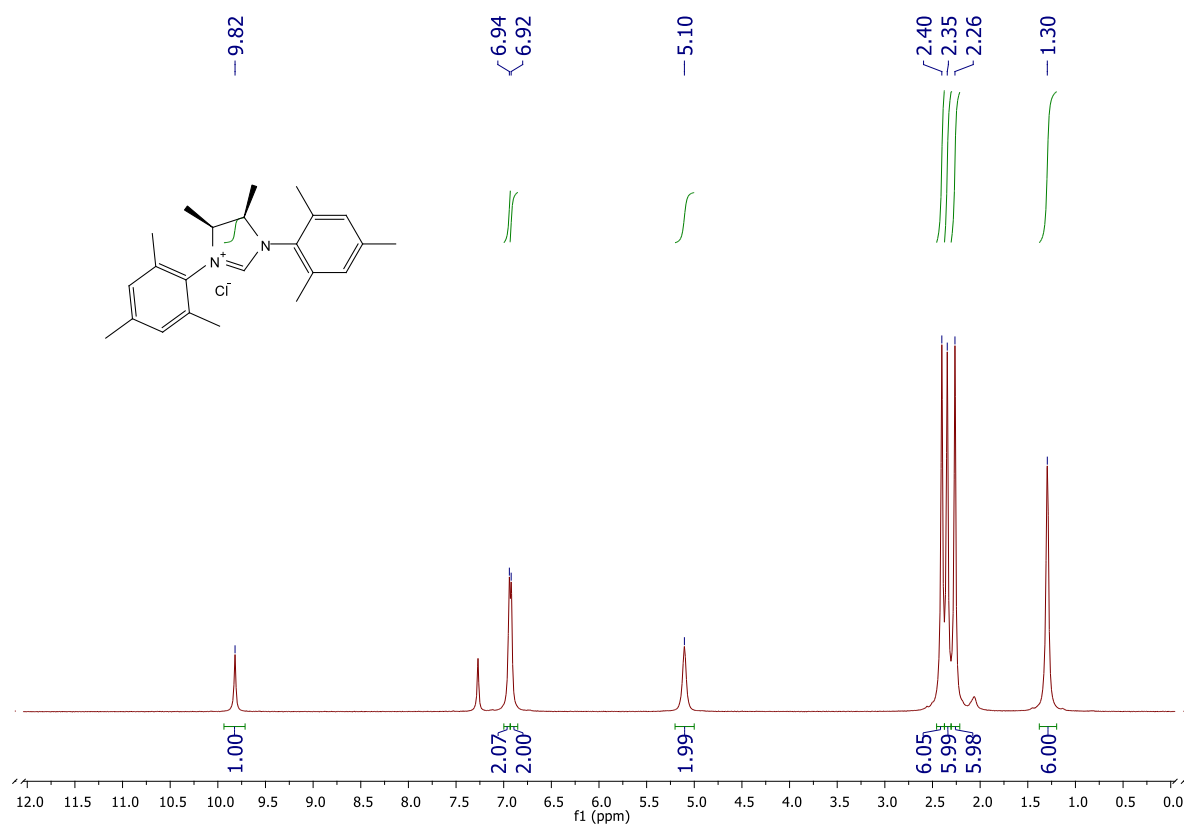

<sup>13</sup>C NMR (101 MHz, CDCl<sub>3</sub>)

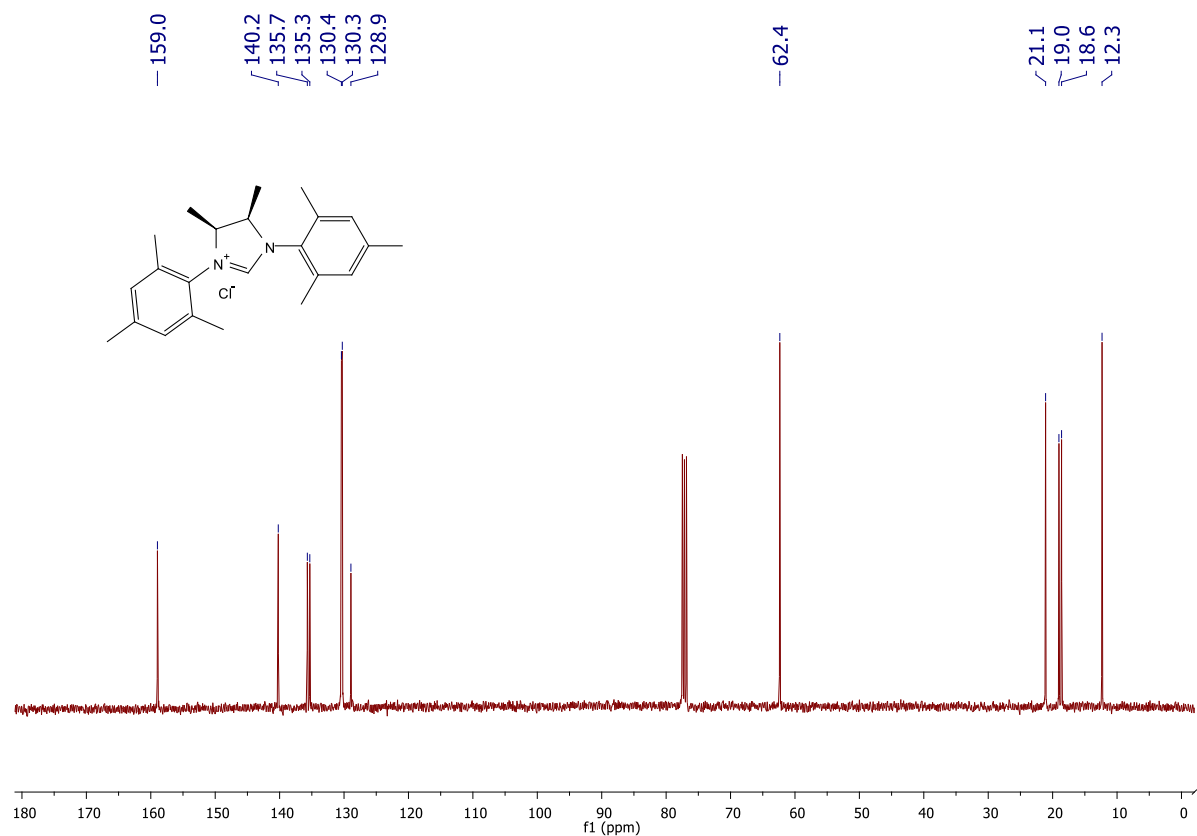

**[1,3-Bis(2,4,6-trimethylphenyl)-4,5-trans-dimethyl]imidazolidinium chloride SIMes<sup>Me</sup>·HCl**

<sup>1</sup>H NMR (400MHz, CDCl<sub>3</sub>)

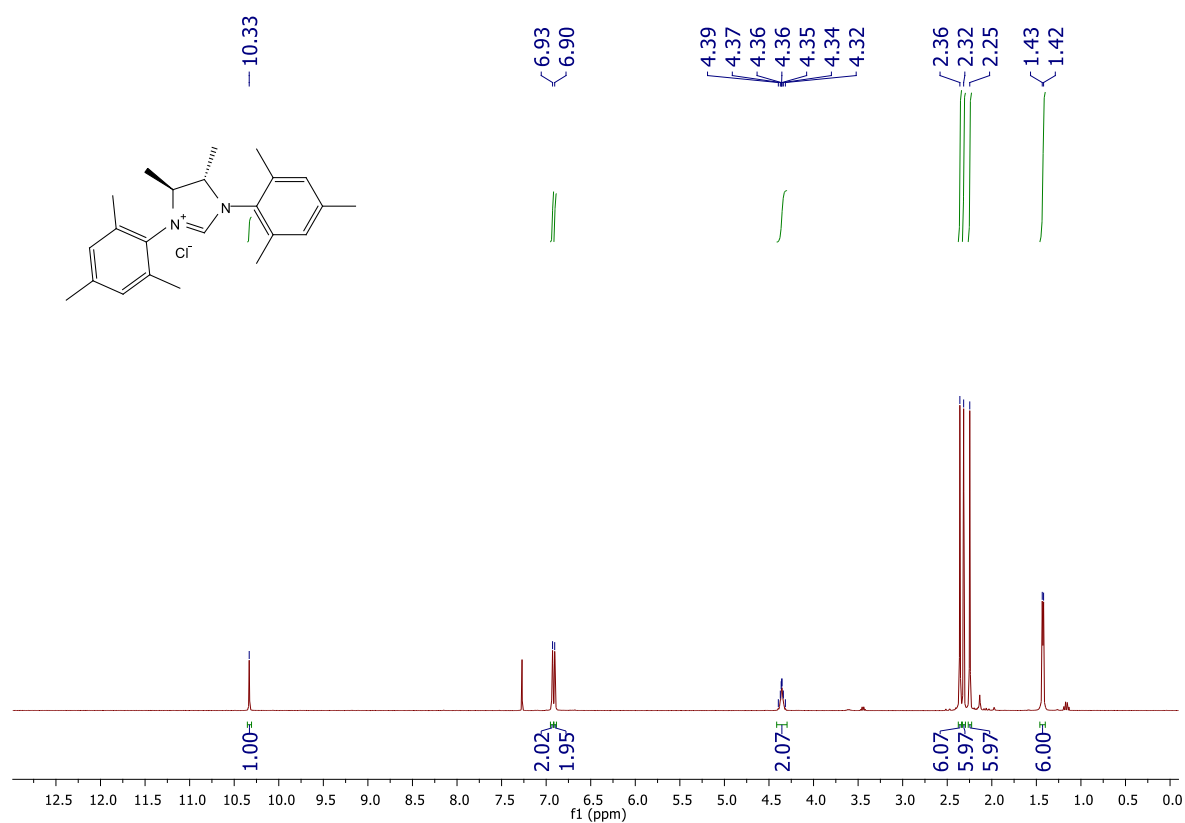

<sup>13</sup>C NMR (101 MHz, CDCl<sub>3</sub>)

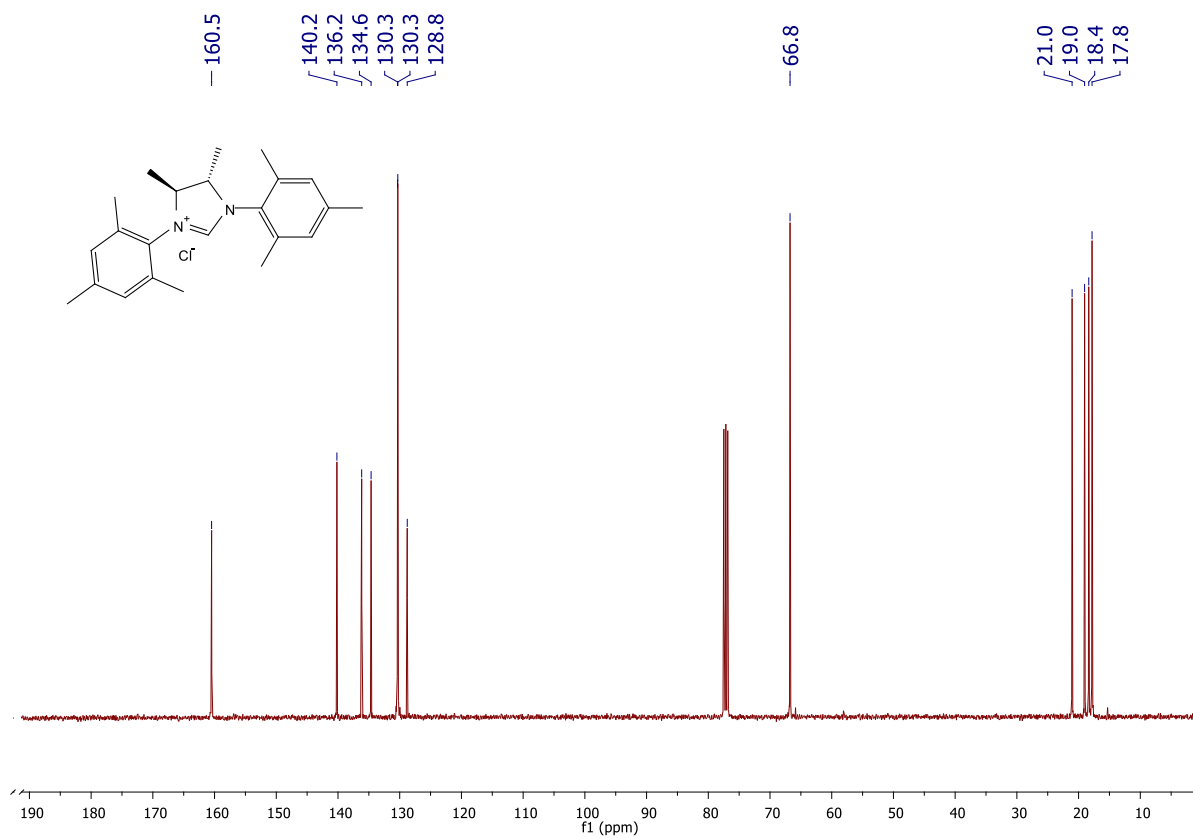

## 4.2 [CuCl(NHC)]

### [1,3-Bis(2,4,6-trimethylphenyl)imidazol-2-ylidene]copper(I) chloride [CuCl(Imes)]

$^1\text{H}$  NMR (300MHz,  $\text{CDCl}_3$ )

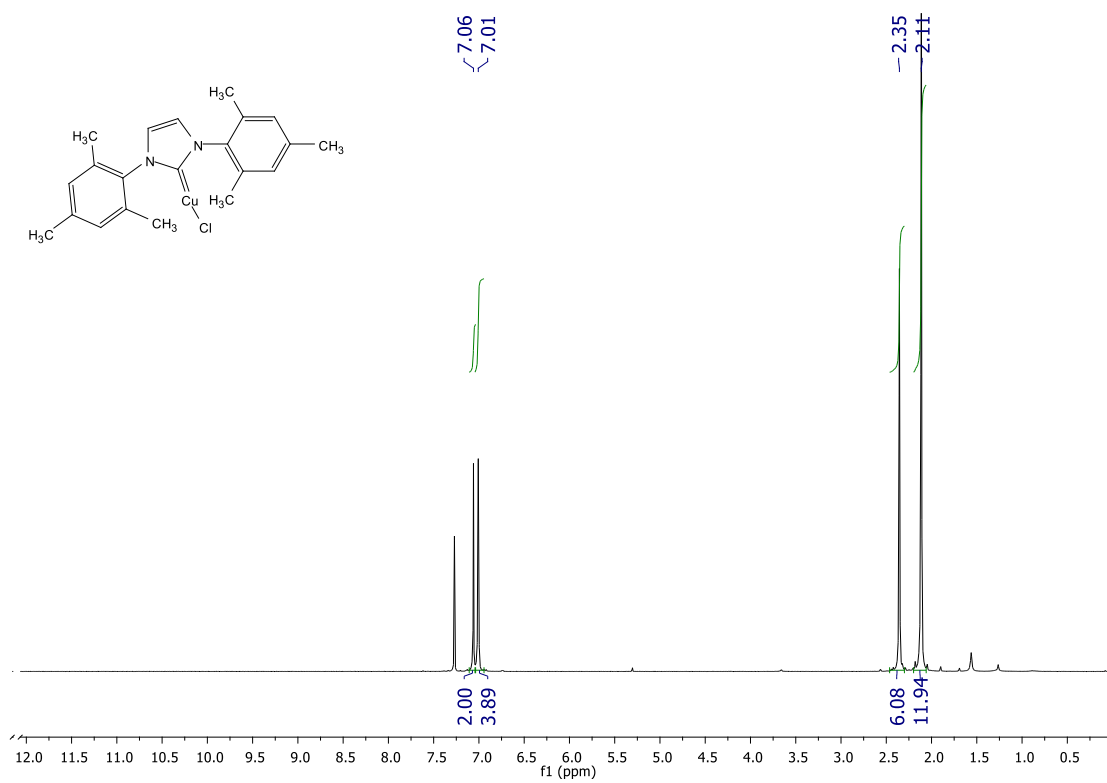

$^{13}\text{C}$  NMR (75 MHz,  $\text{CDCl}_3$ )

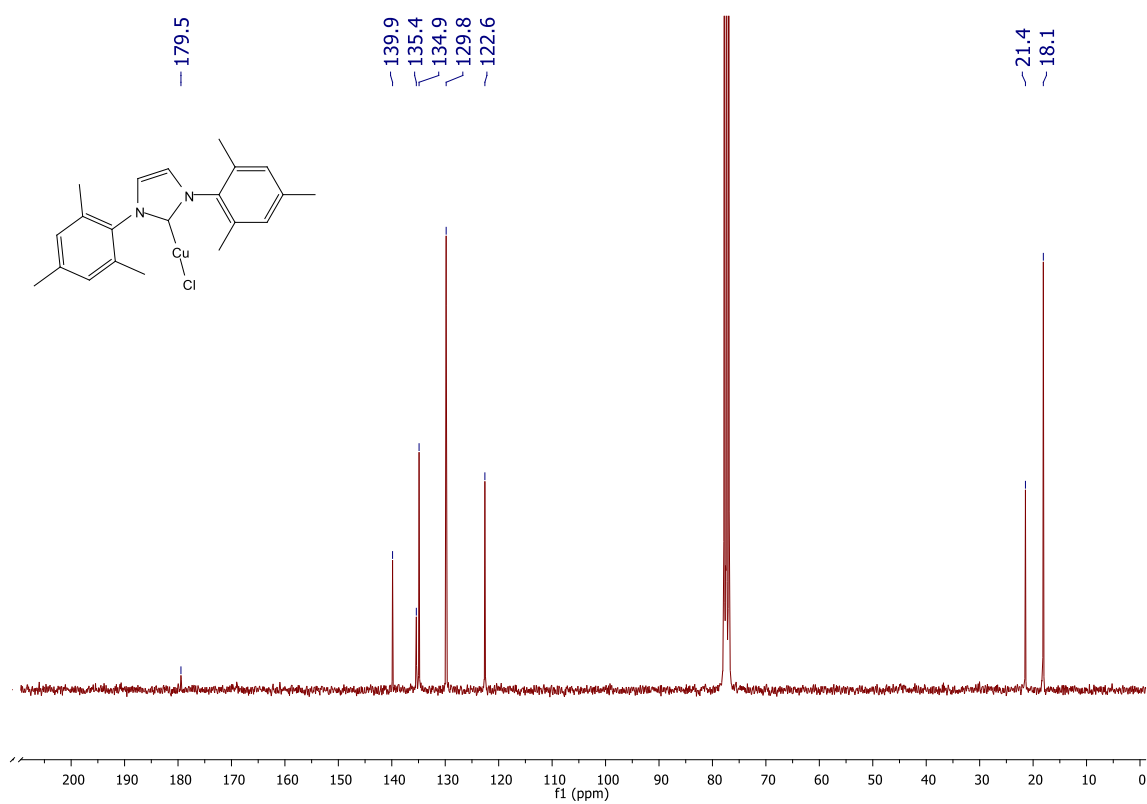



**[1,3-Bis-(2,6-diisopropylphenyl)imidazol-2-ylidene]copper(I) chloride [CuCl(IPr)]**

$^1\text{H}$  NMR (400MHz,  $\text{CDCl}_3$ )

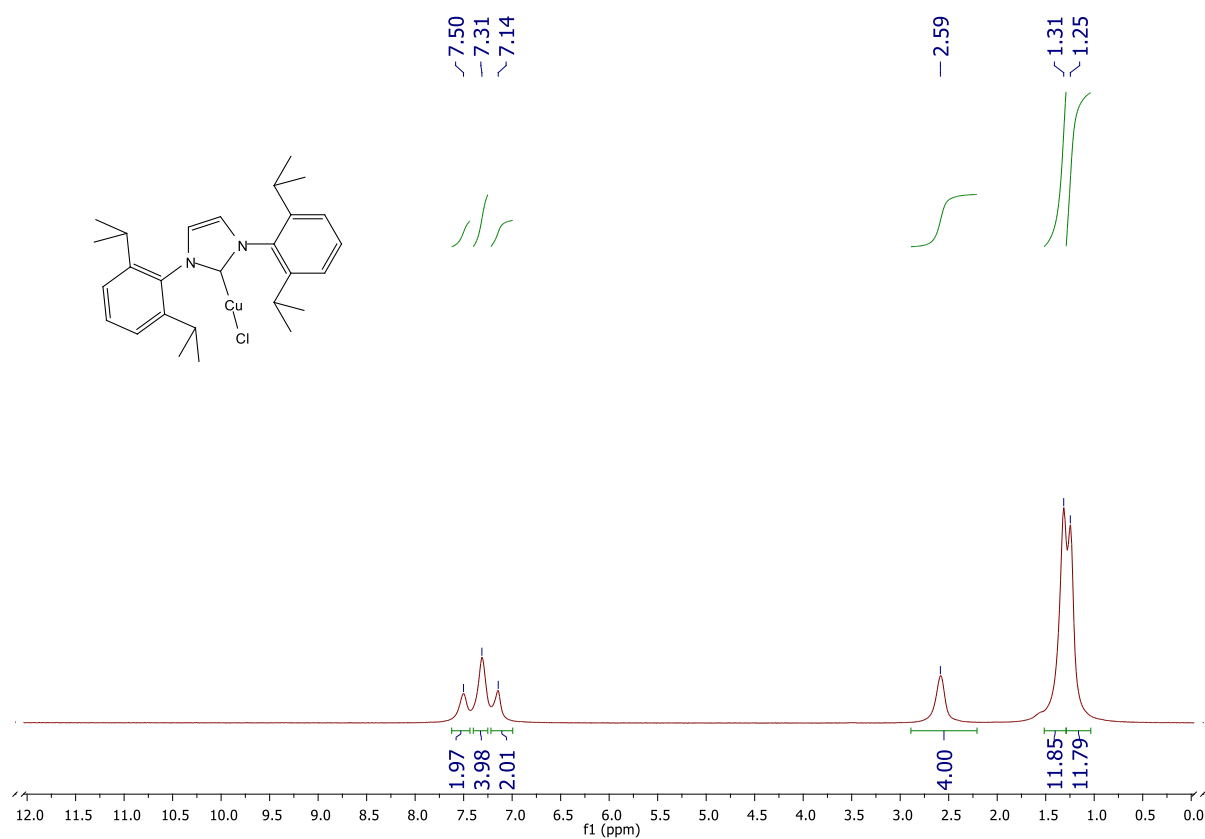

$^{13}\text{C}$  NMR (101 MHz,  $\text{CDCl}_3$ )

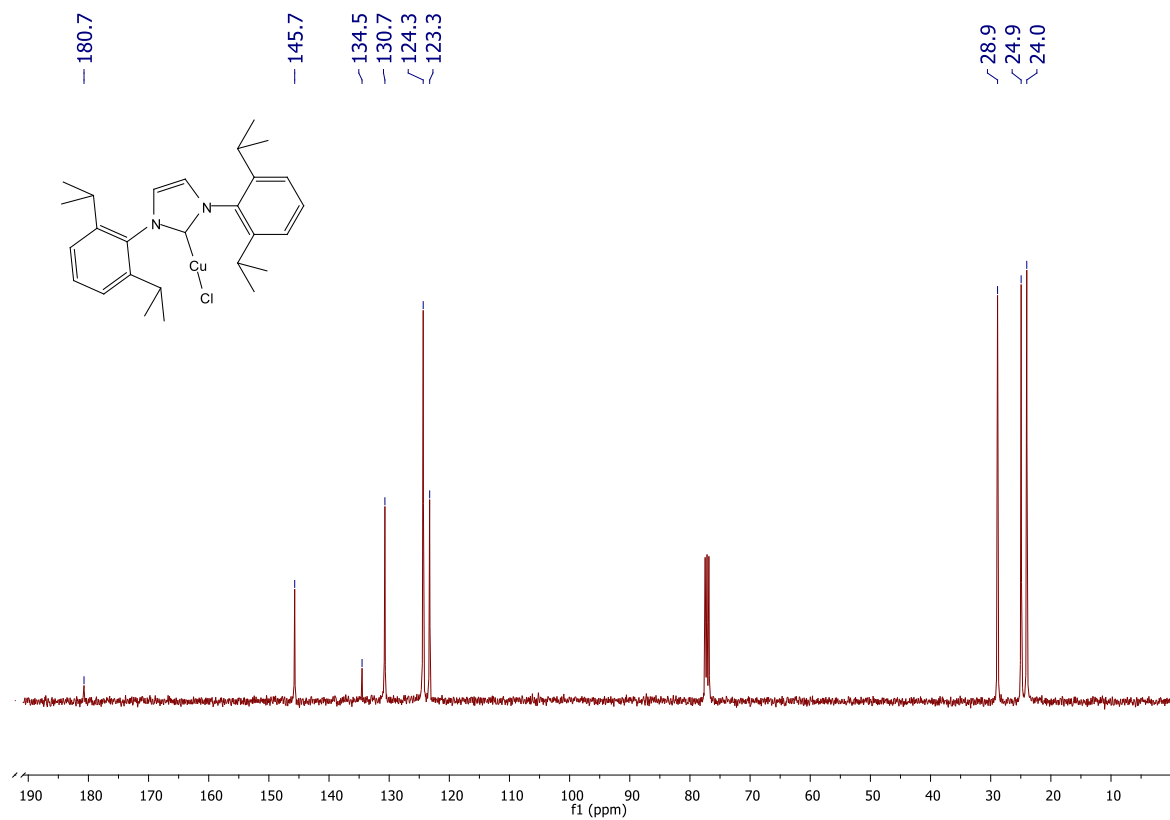

**[1,3-Bis(2,4,6-trimethylphenyl)imidazolidin-2-ylidene]copper(I) chloride [CuCl(SIMes)]**

$^1\text{H}$  NMR (300MHz,  $\text{CDCl}_3$ )

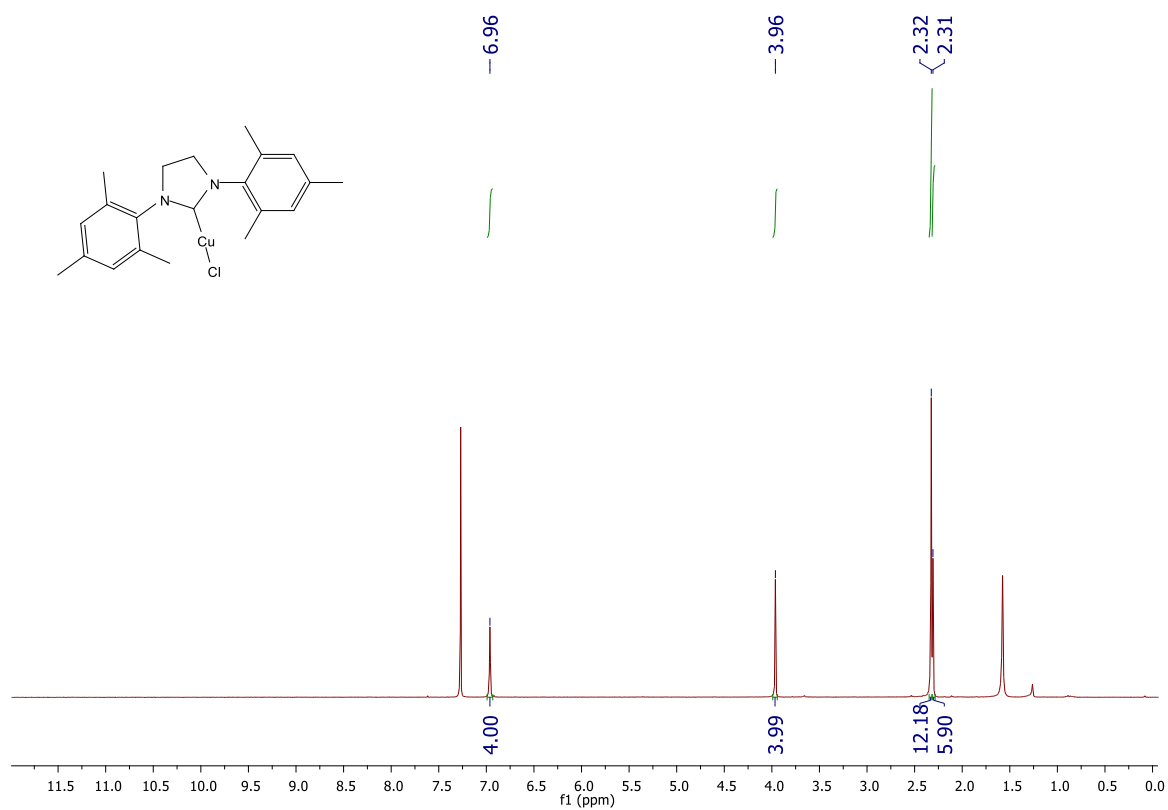

$^{13}\text{C}$  NMR (101 MHz,  $\text{CDCl}_3$ )

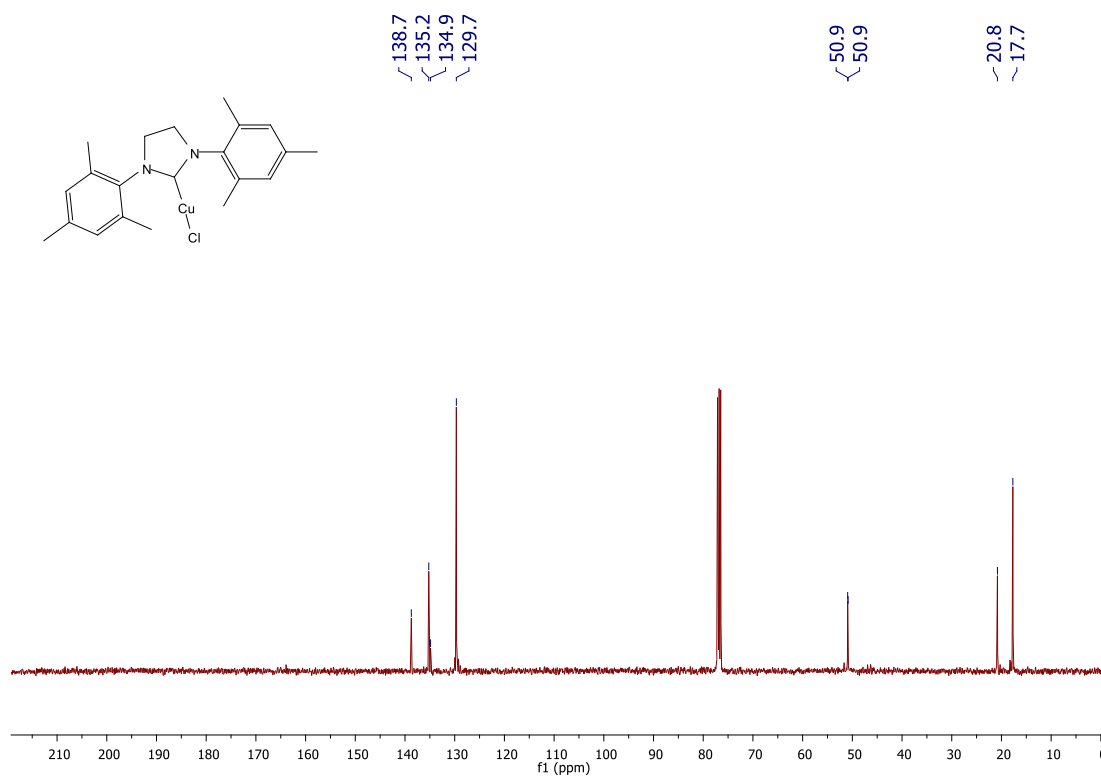

**[1,3-Bis(2,6-diisopropylphenyl)imidazolidin-2-ylidene]copper(I) chloride [CuCl(SIPr)]**

$^1\text{H}$  NMR (400MHz, DMSO- $d_6$ )

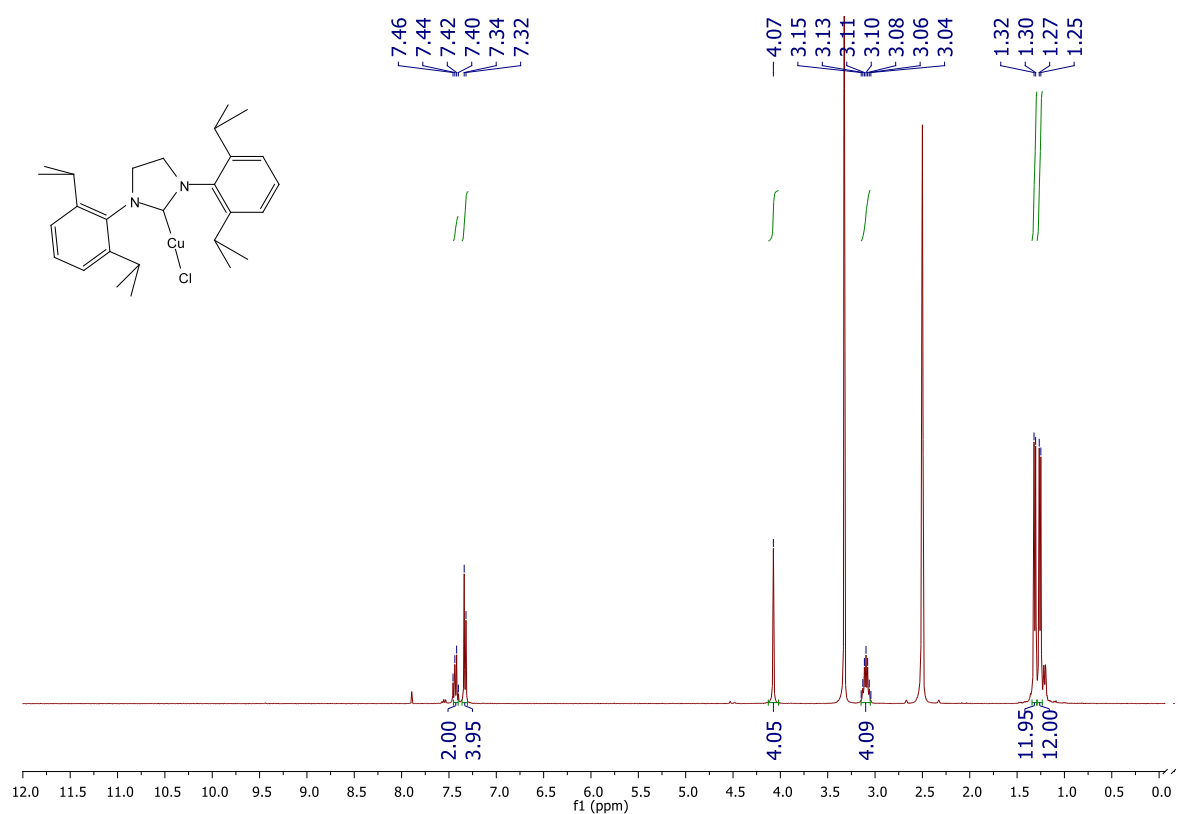

$^{13}\text{C}$  NMR (101 MHz, DMSO- $d_6$ )

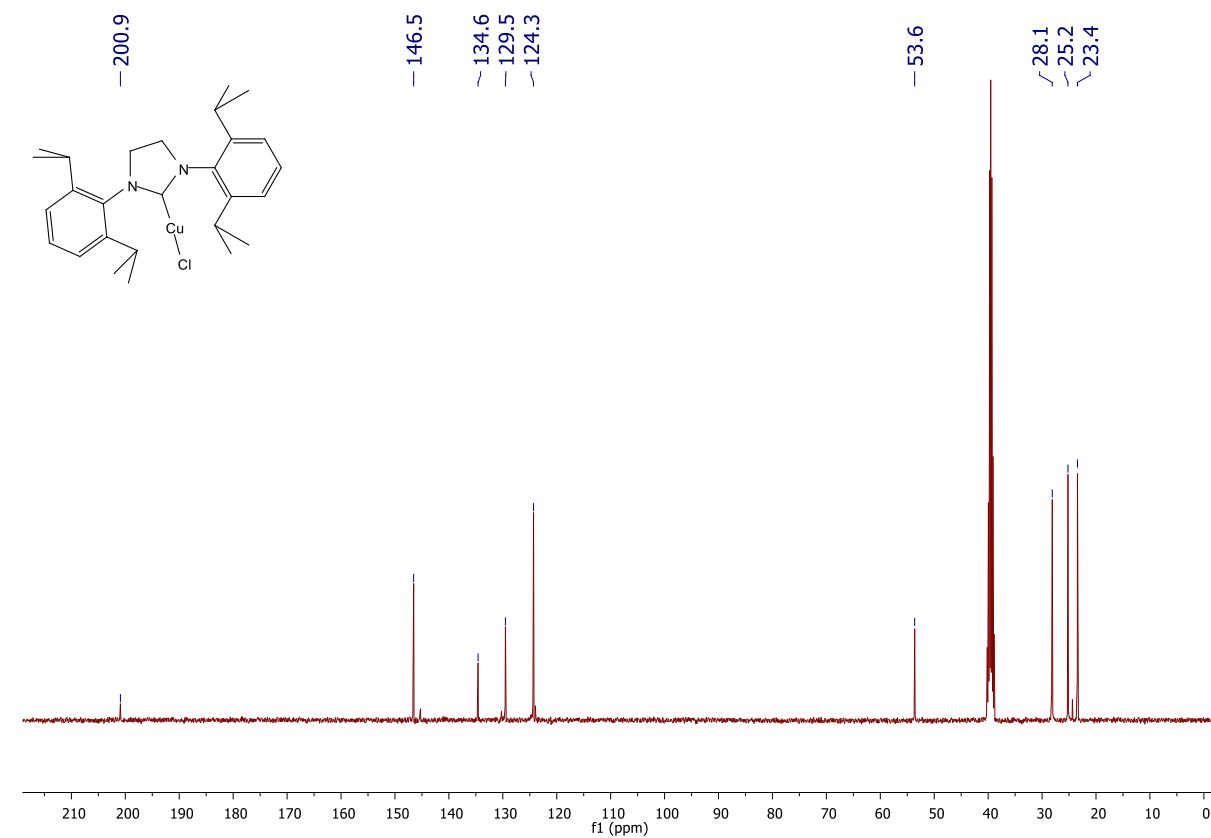

**[(1,3-Bis(2,4,6-trimethylphenyl)-4,5-dimethylimidazol-2-ylidene)copper(I) chloride [CuCl(IMes<sup>Me</sup>)]**

<sup>1</sup>H NMR (400MHz, CDCl<sub>3</sub>)

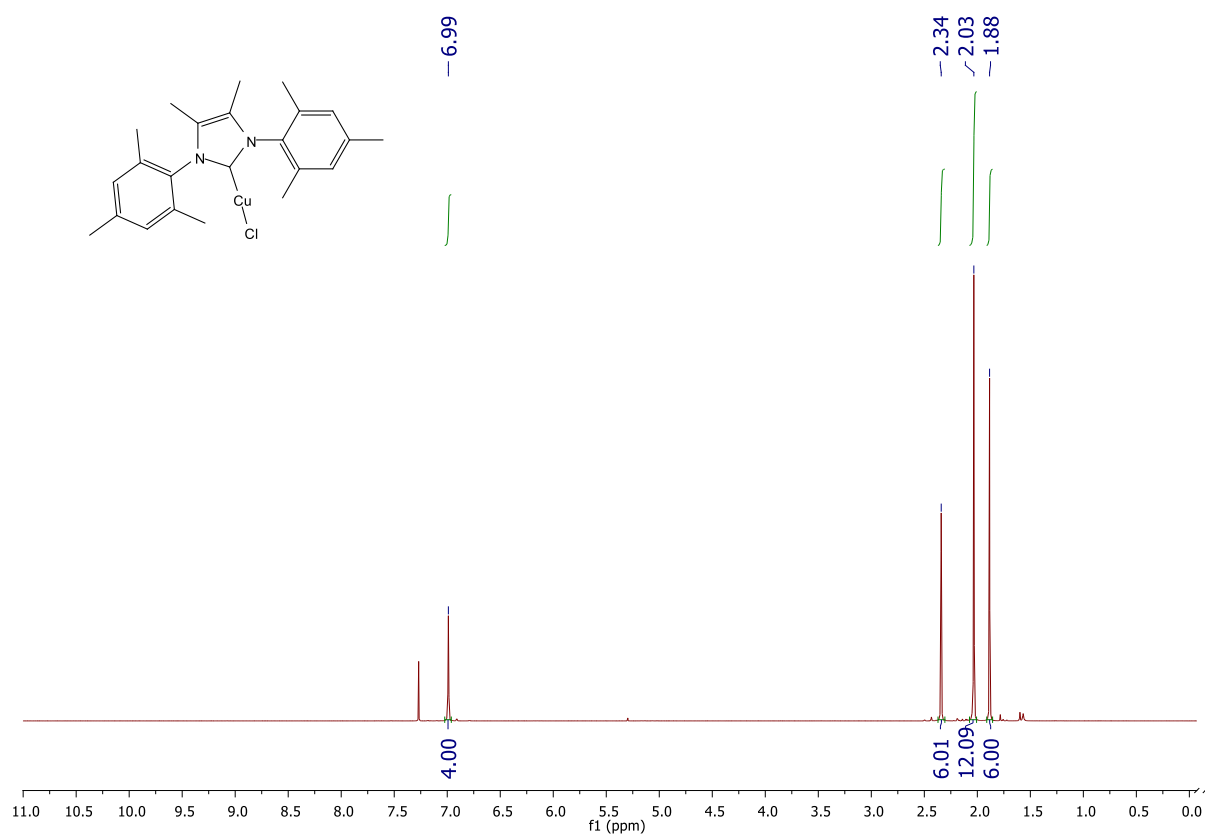

<sup>13</sup>C NMR (101 MHz, CDCl<sub>3</sub>)

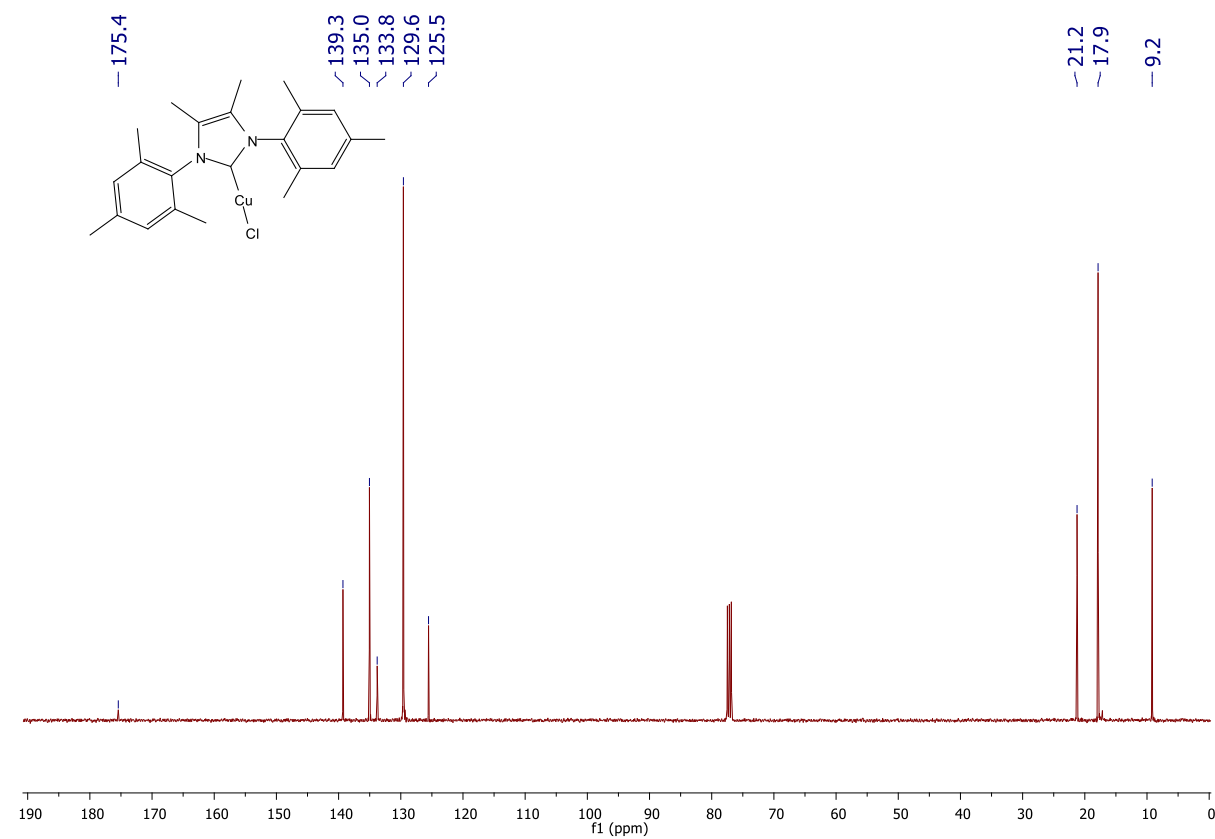

**[(1,3-Bis(2,6-diisopropylphenyl)-4,5-dimethylimidazole-2-ylidene)copper(I) chloride [CuCl(IPr<sup>Me</sup>)]**

<sup>1</sup>H NMR (400MHz, DMSO-*d*<sub>6</sub>)

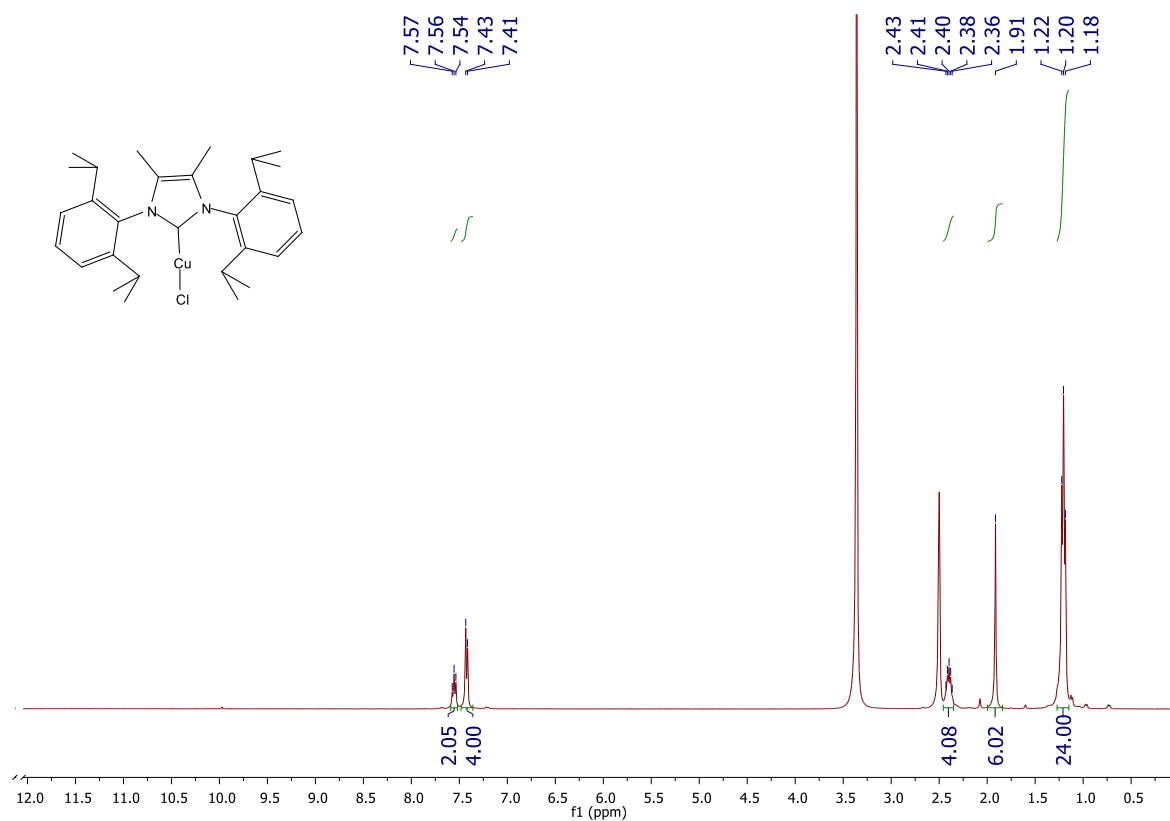

<sup>13</sup>C NMR (101 MHz, DMSO-*d*<sub>6</sub>)

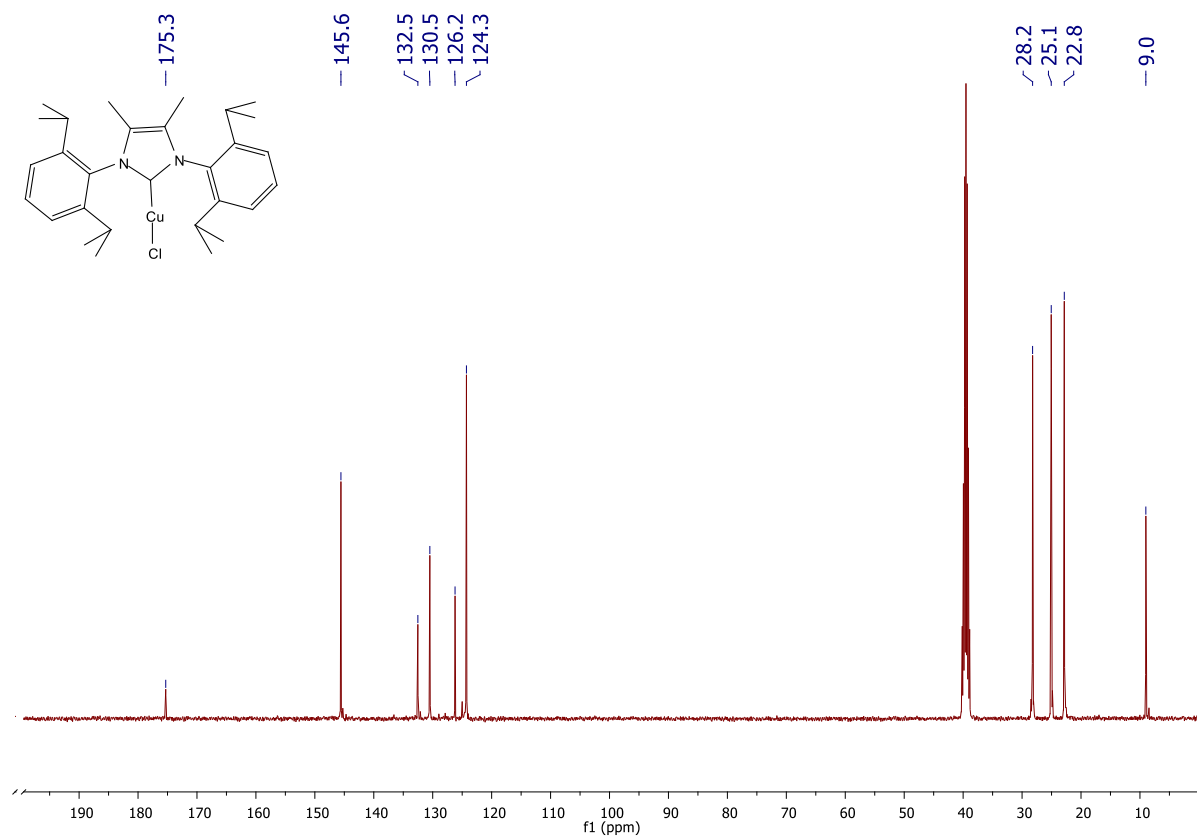

**[(1,3-Bis-(2,4,6-trimethylphenyl)-4,5-*trans*-dimethyl)imidazolidin-2-ylidene]copper(I) chloride**  
**SiMe<sup>Me</sup><sub>3</sub>CuCl**

<sup>1</sup>H NMR (300MHz, CDCl<sub>3</sub>)

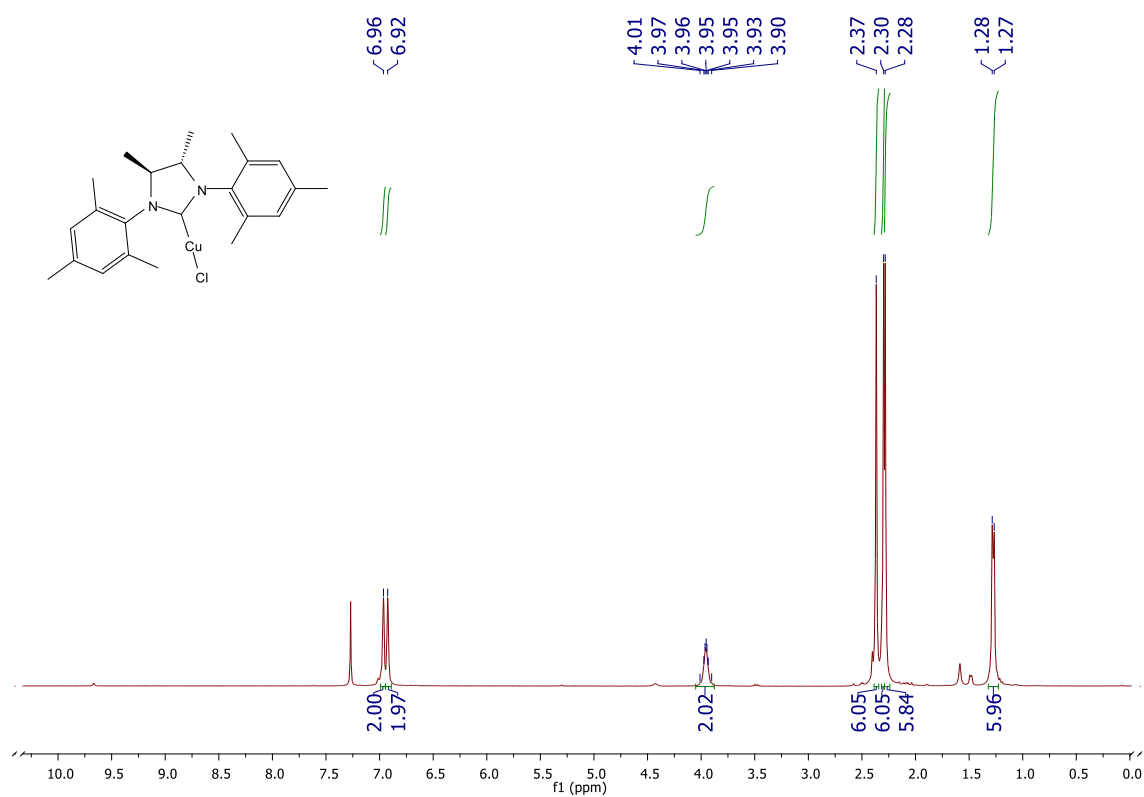

<sup>13</sup>C NMR (101 MHz, CDCl<sub>3</sub>)

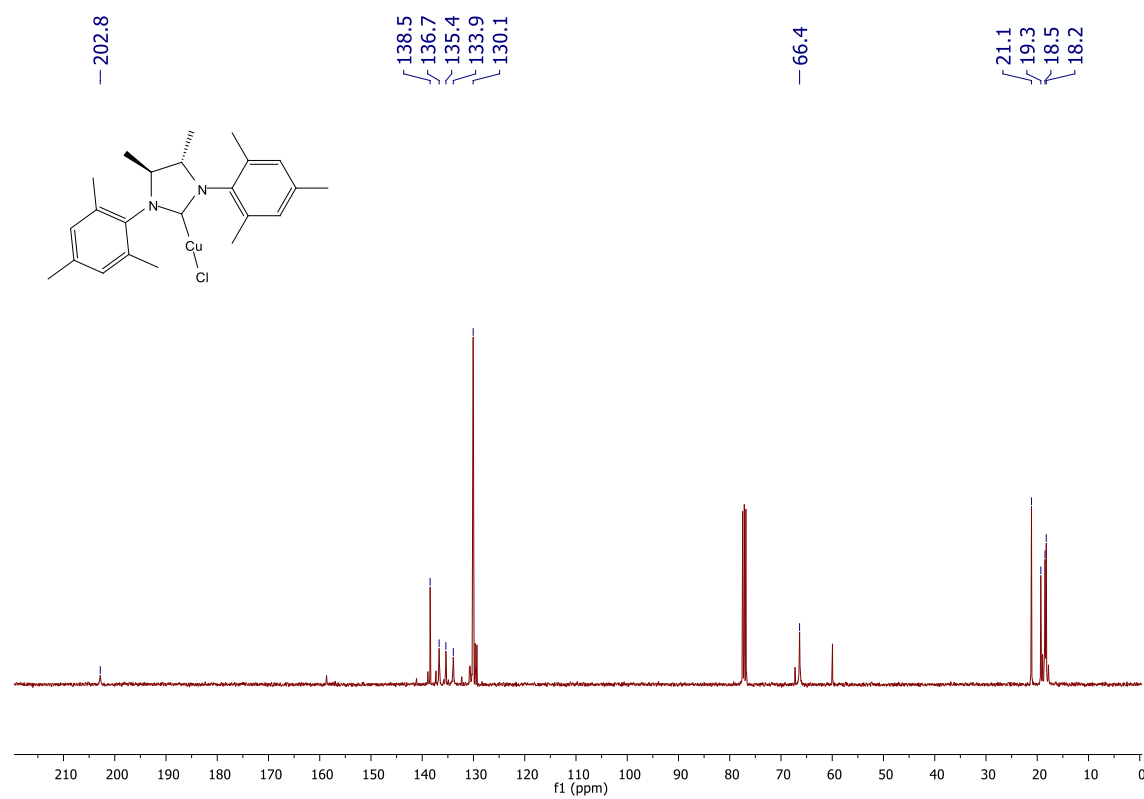

### 4.3 [Cu(NHC)<sub>2</sub>]Y (Y = BF<sub>4</sub> or PF<sub>6</sub>)

Bis[1,3-bis(2,4,6-trimethylphenyl)imidazol-2-ylidene]copper tetrafluoroborate [Cu(IMes)<sub>2</sub>]BF<sub>4</sub>

<sup>1</sup>H NMR (400MHz, DMSO-*d*<sub>6</sub>)

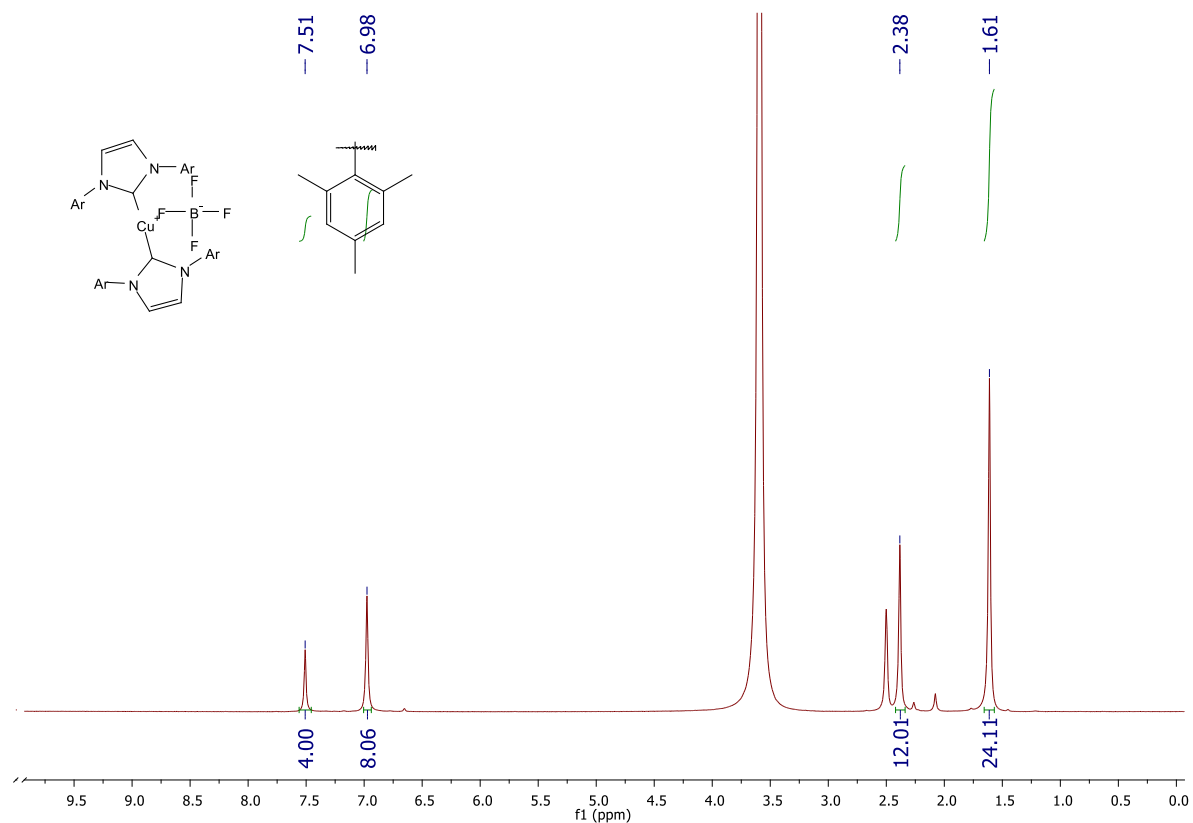

<sup>13</sup>C NMR (101 MHz, DMSO-*d*<sub>6</sub>)

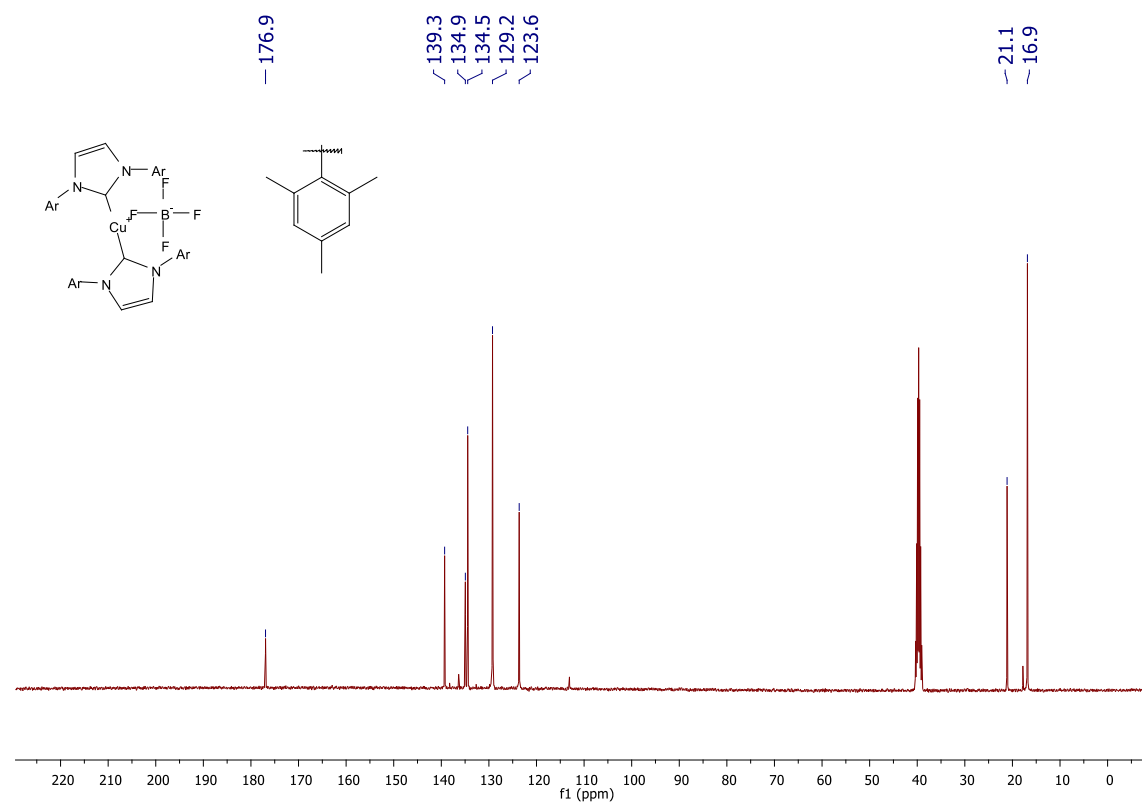

$^{19}\text{F}$  NMR (376 MHz,  $\text{DMSO-}d_6$ )

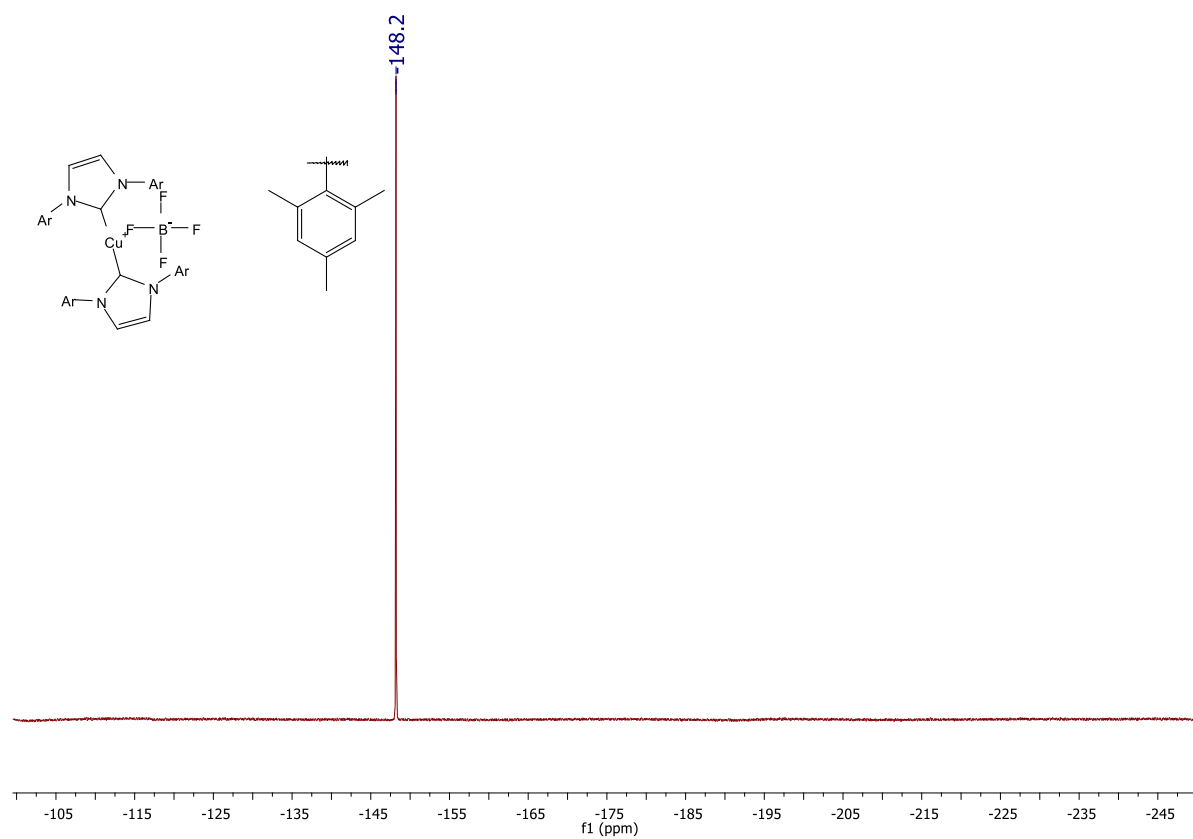



**Bis[1,3-bis(2,4,6-trimethylphenyl)imidazol-2-ylidene]copper hexafluorophosphate [Cu(IMes)<sub>2</sub>]PF<sub>6</sub>**

<sup>1</sup>H NMR (400MHz, DMSO-*d*<sub>6</sub>)

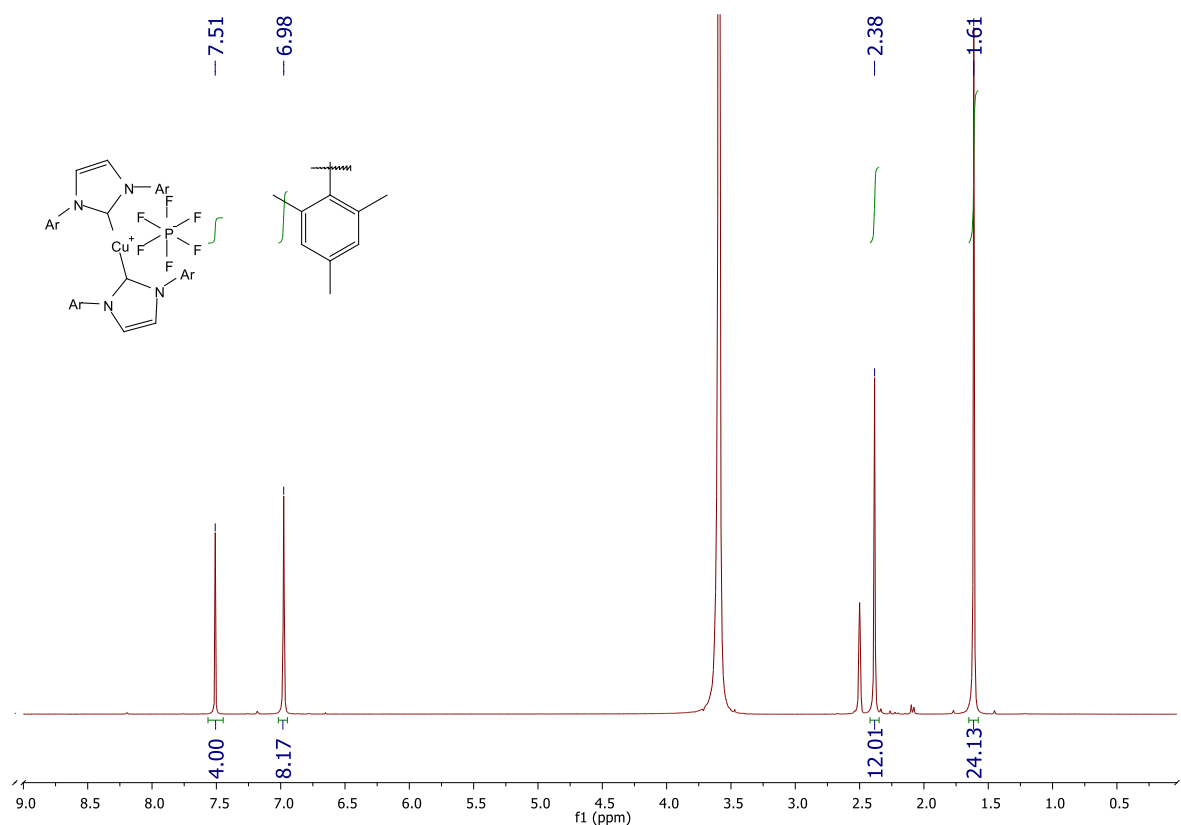

<sup>13</sup>C NMR (101 MHz, DMSO-*d*<sub>6</sub>)

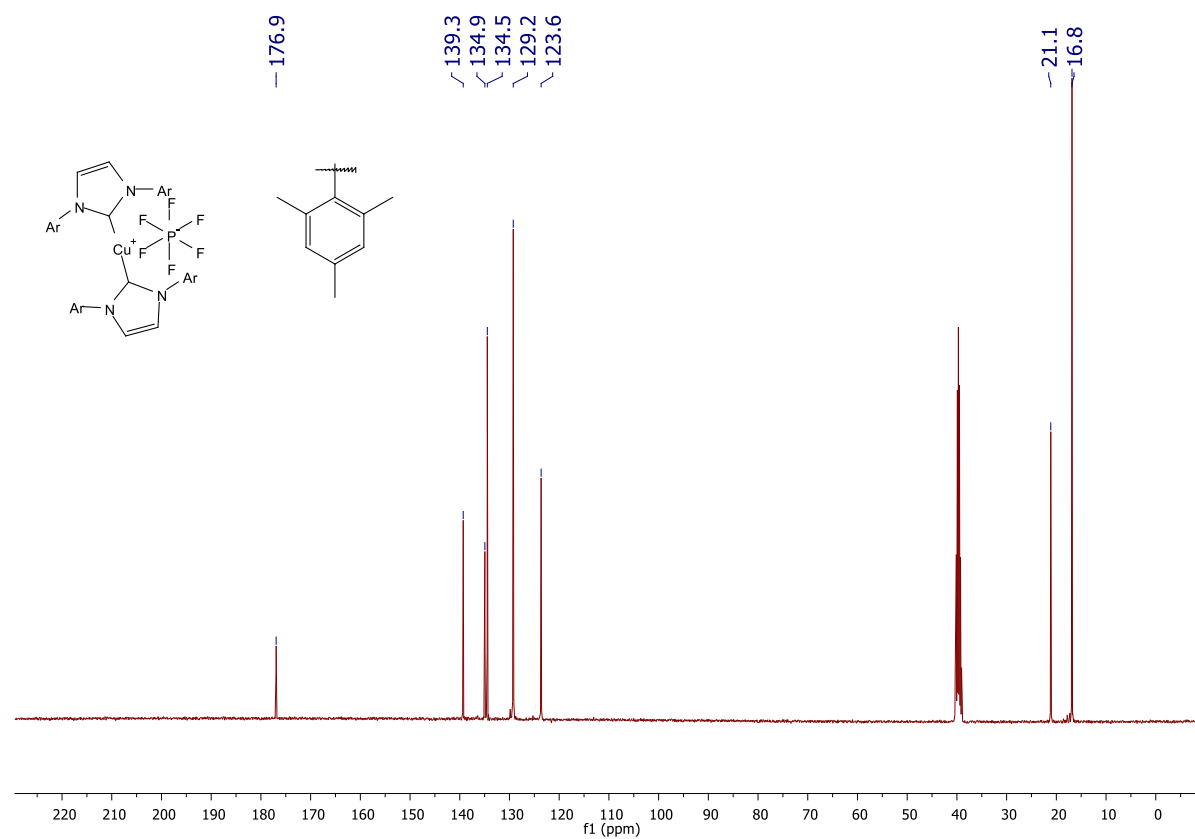

$^{31}\text{P}$  NMR (162 MHz,  $\text{DMSO-}d_6$ )

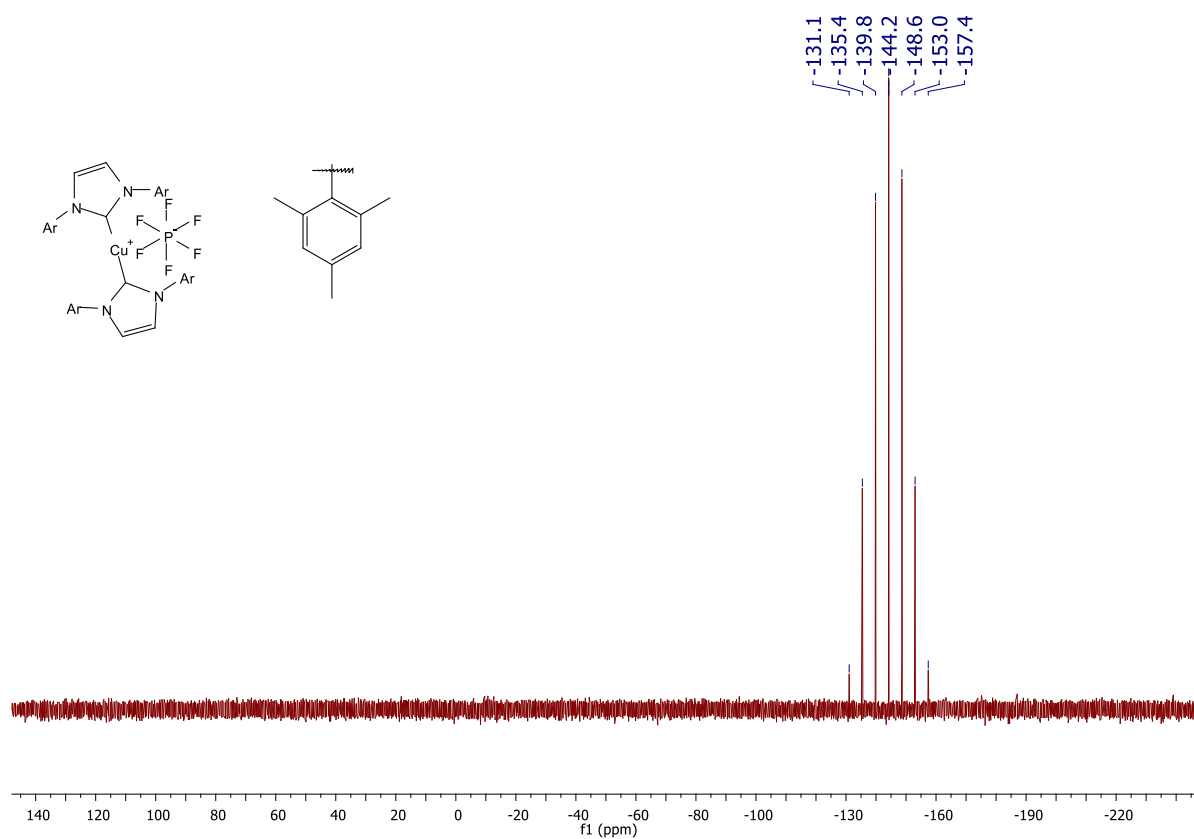

$^{19}\text{F}$  NMR (376 MHz,  $\text{DMSO-}d_6$ )

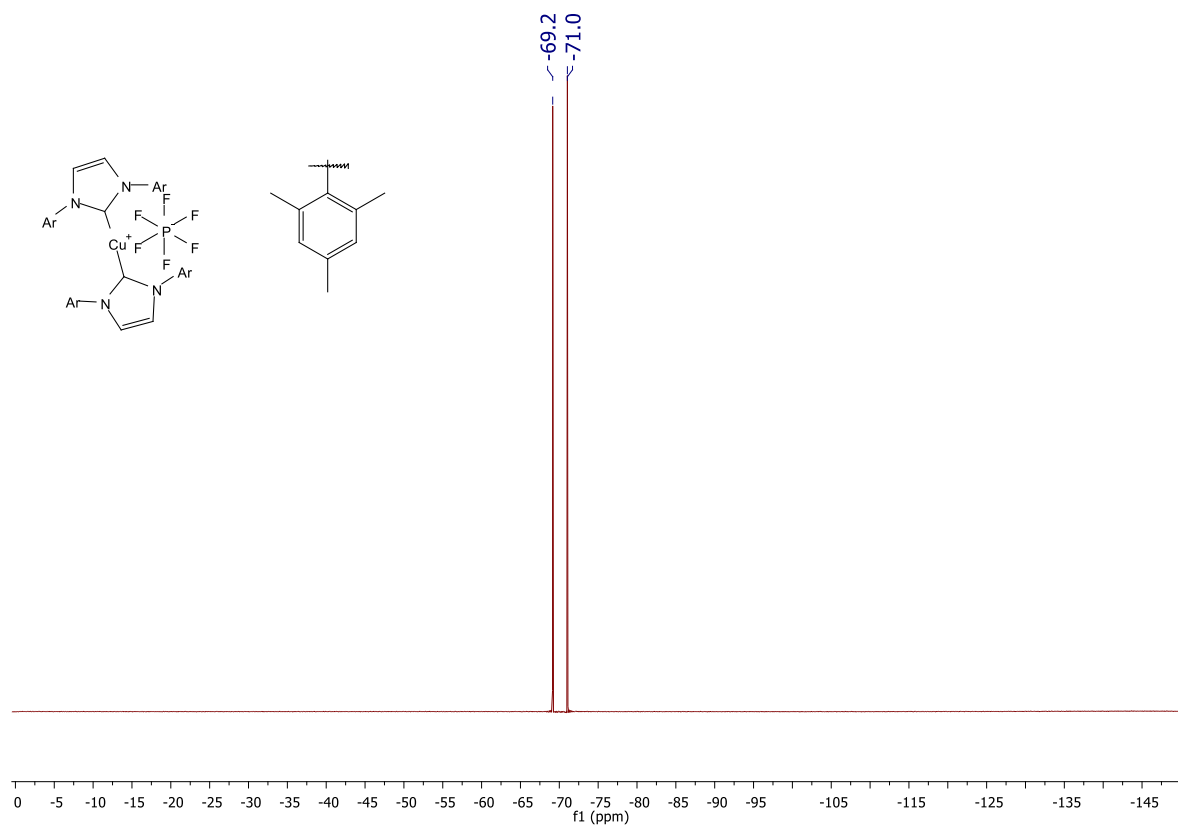

**Bis[1,3-bis(2,6-diisopropylphenyl)imidazol-2-ylidene]copper tetrafluoroborate [Cu(IPr)<sub>2</sub>]BF<sub>4</sub>**

<sup>1</sup>H NMR (400MHz, DMSO-*d*<sub>6</sub>)

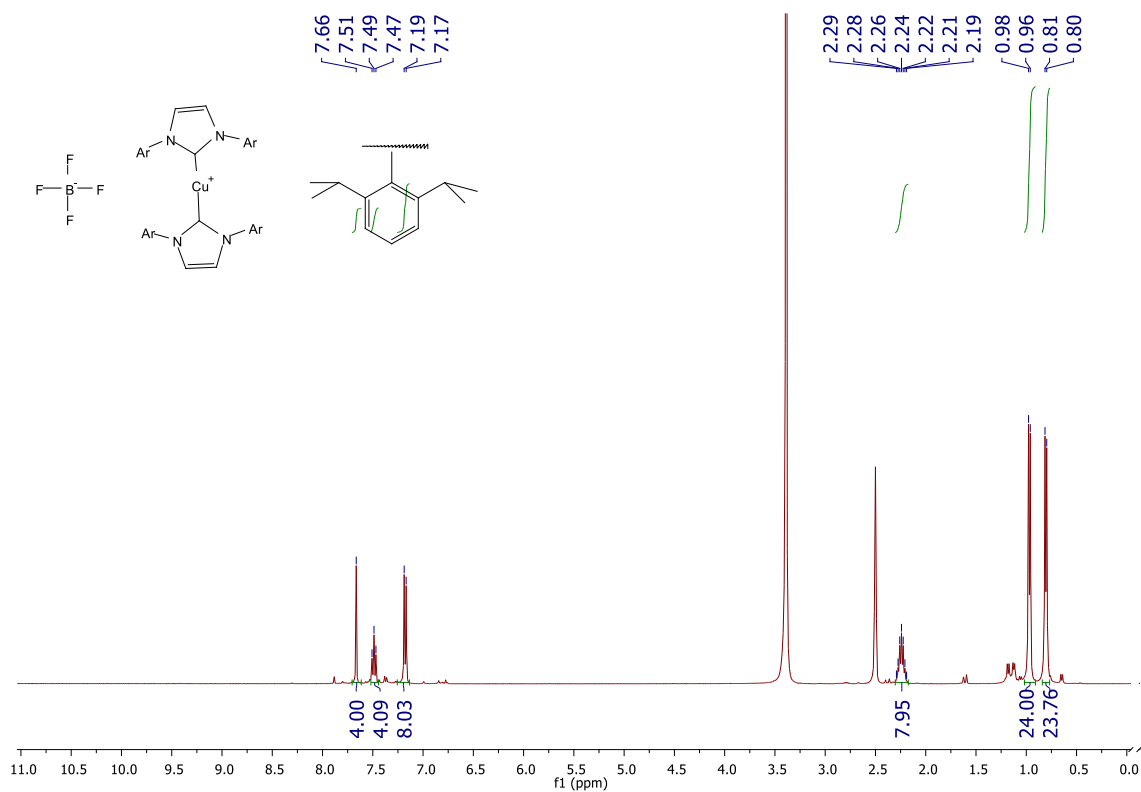

<sup>13</sup>C NMR (101MHz, DMSO-*d*<sub>6</sub>)

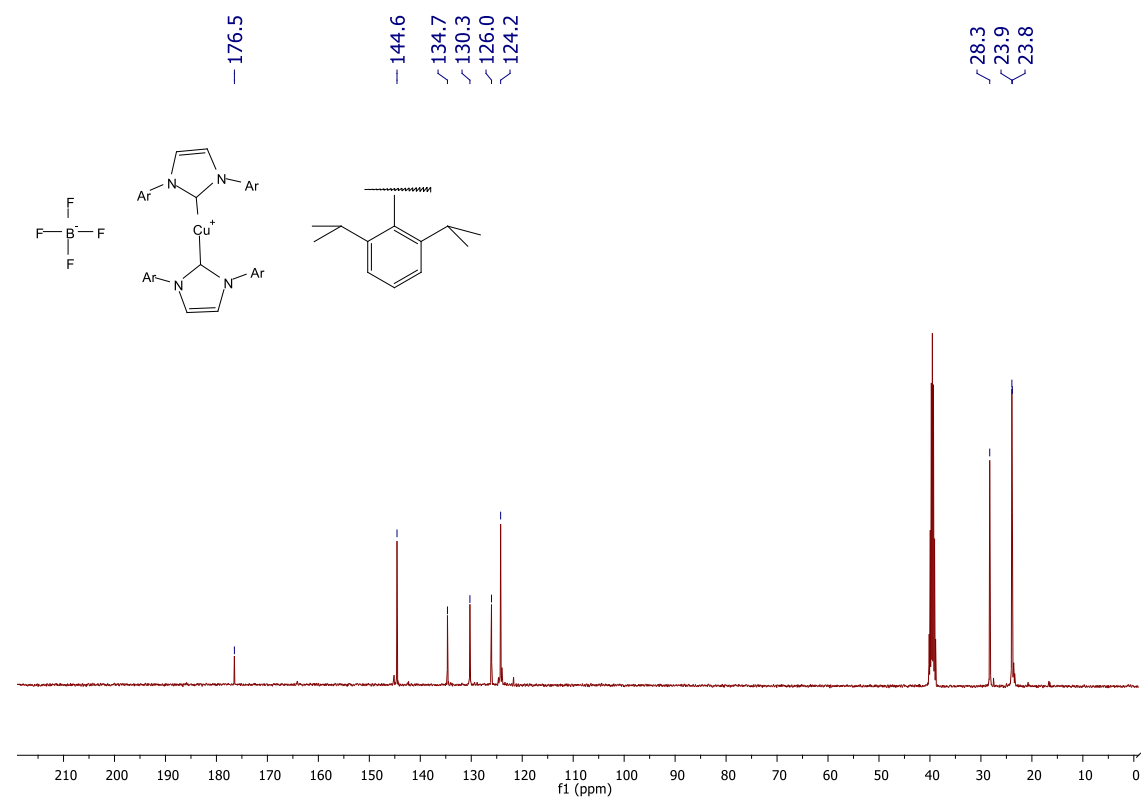

$^{19}\text{F}$  NMR (376 MHz,  $\text{DMSO-}d_6$ )

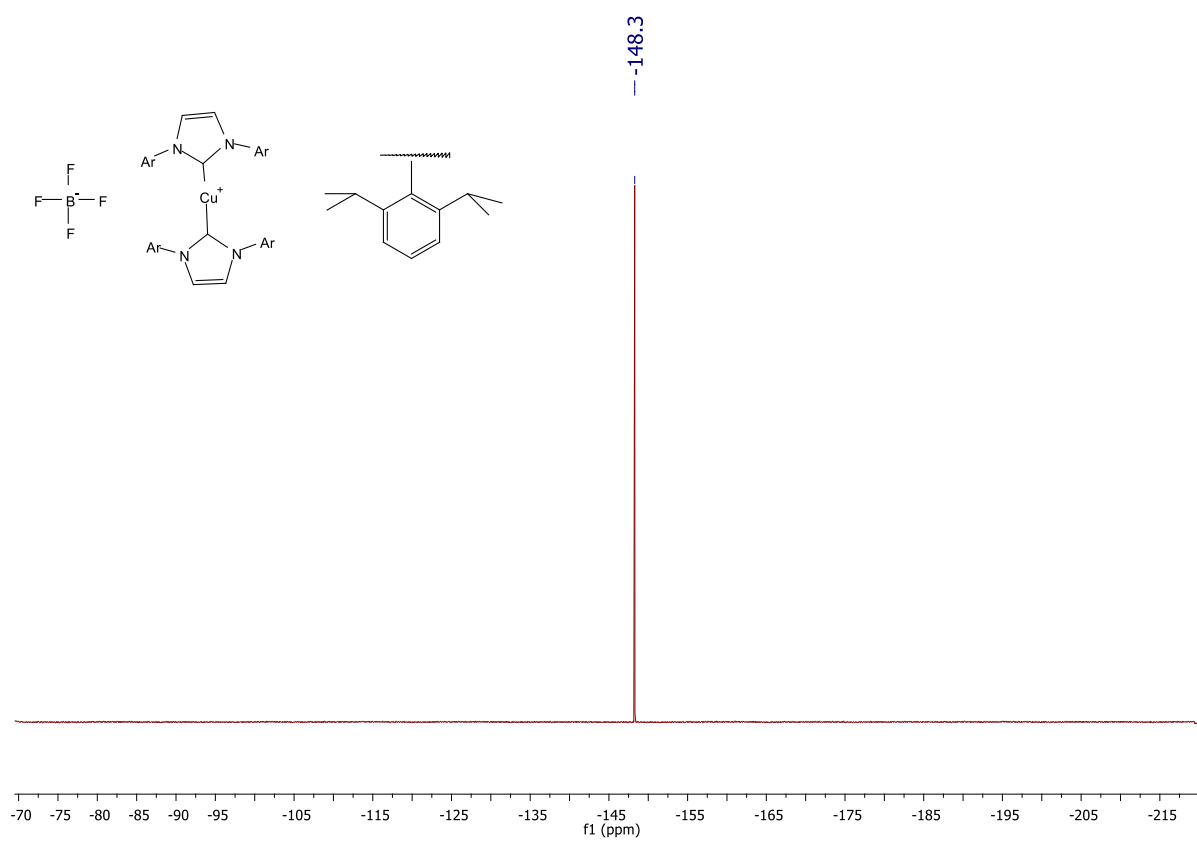

**Bis[1,3-bis(2,6-diisopropylphenyl)imidazol-2-ylidene]copper hexafluorophosphate [Cu(IPr)<sub>2</sub>]PF<sub>6</sub>**

<sup>1</sup>H NMR (400MHz, DMSO-*d*<sub>6</sub>)

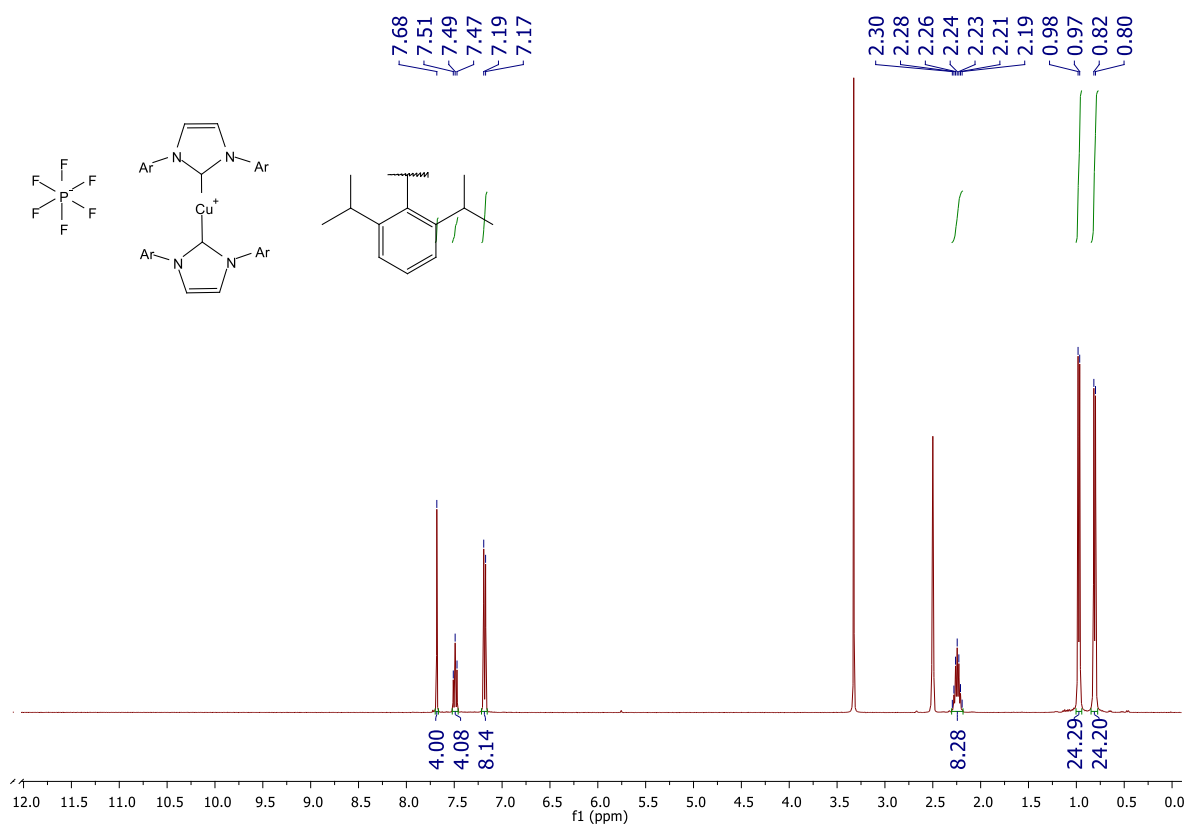

<sup>13</sup>C NMR (101MHz, DMSO-*d*<sub>6</sub>)

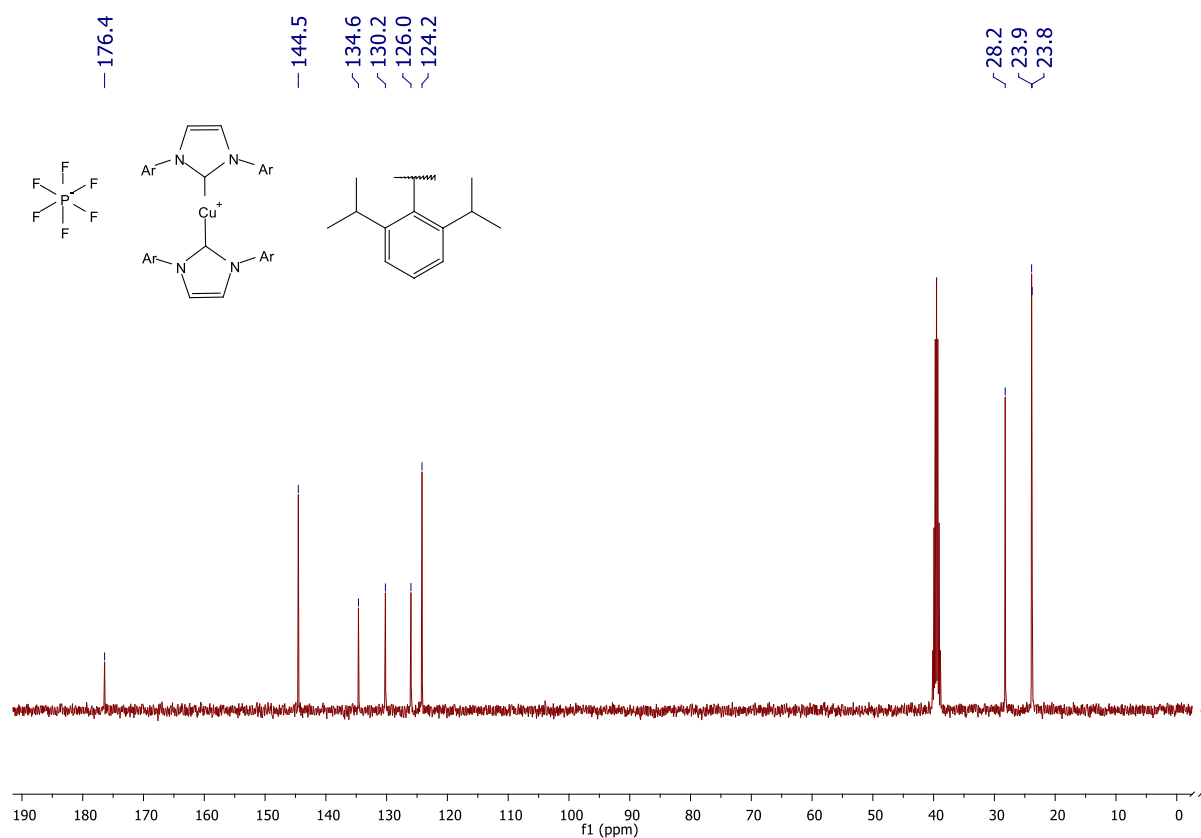

$^{31}\text{P}$  NMR (162 MHz,  $\text{DMSO-}d_6$ )

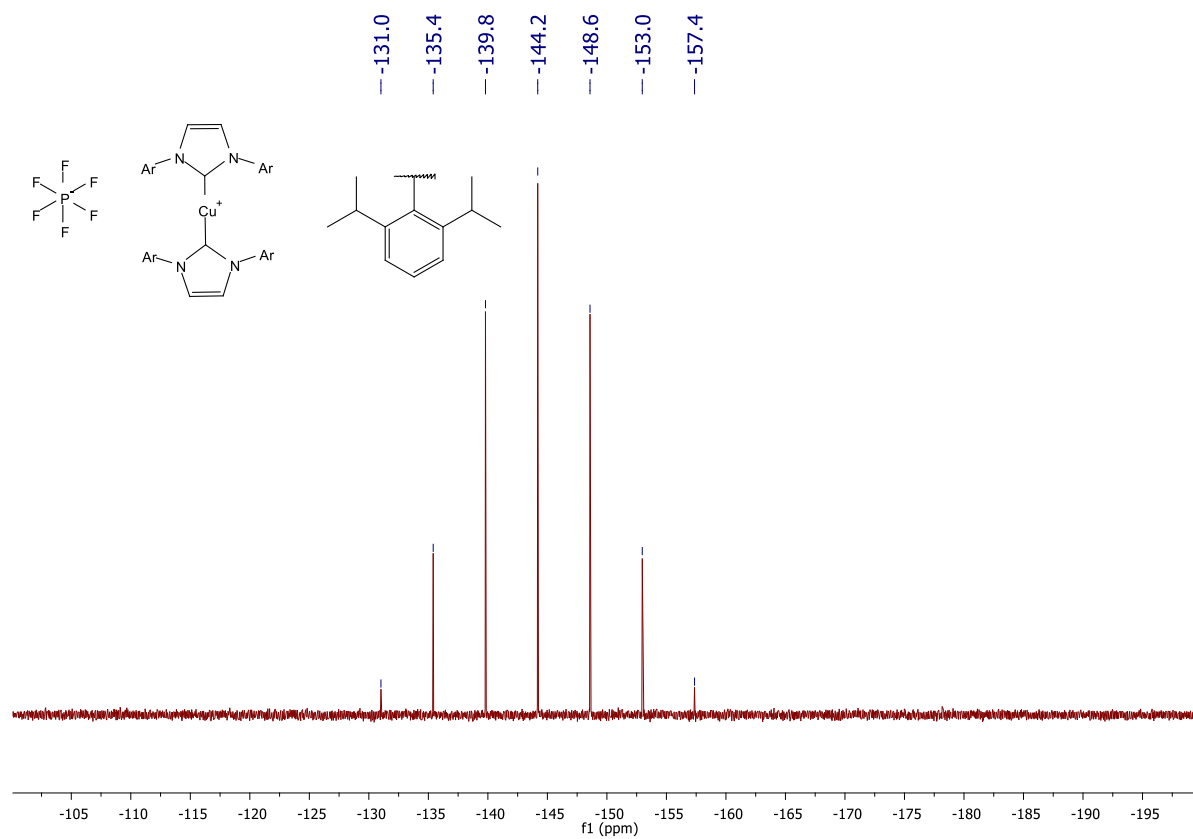

$^{19}\text{F}$  NMR (376 MHz,  $\text{DMSO-}d_6$ )

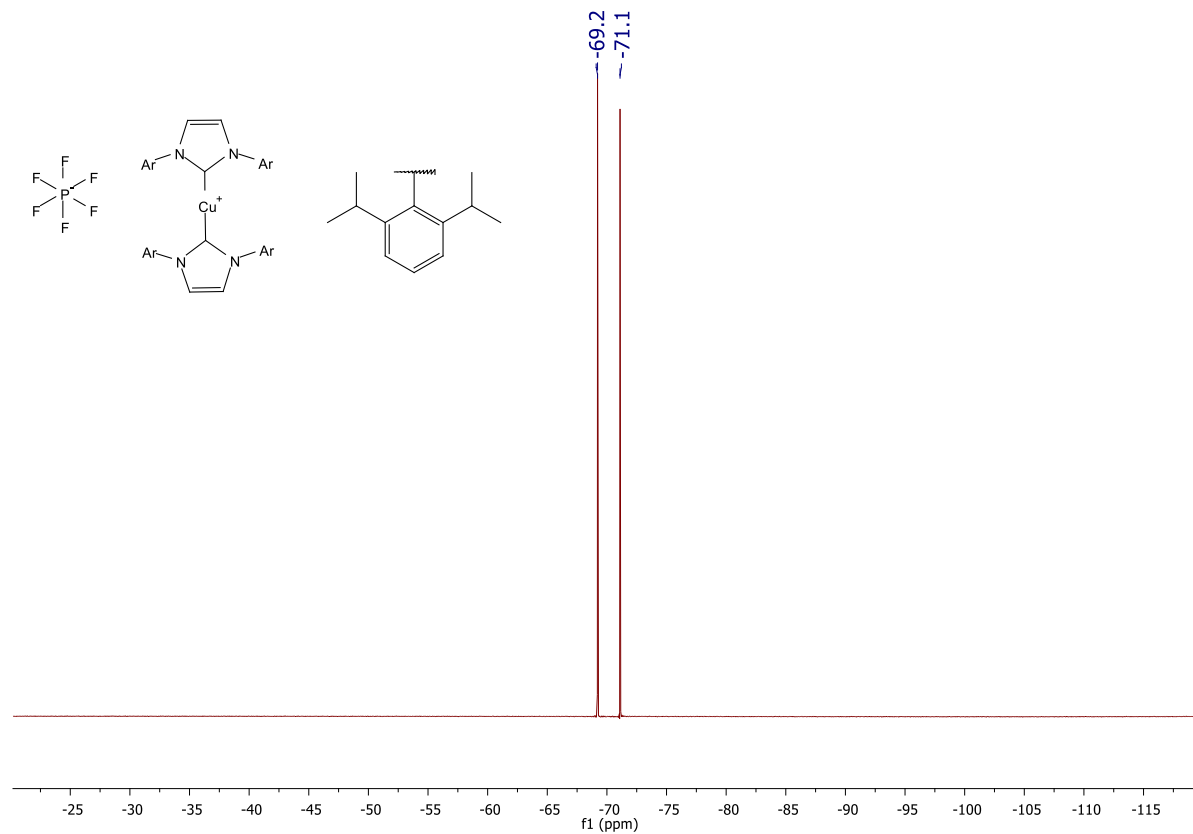

**Bis[(1,3-bis(2,4,6-trimethylphenyl)-4,5-dimethylimidazol-2-ylidene)copper  
[Cu(IMes<sup>Me</sup>)<sub>2</sub>]BF<sub>4</sub>**

**tetrafluoroborate**

<sup>1</sup>H NMR (400MHz, DMSO-*d*<sub>6</sub>)

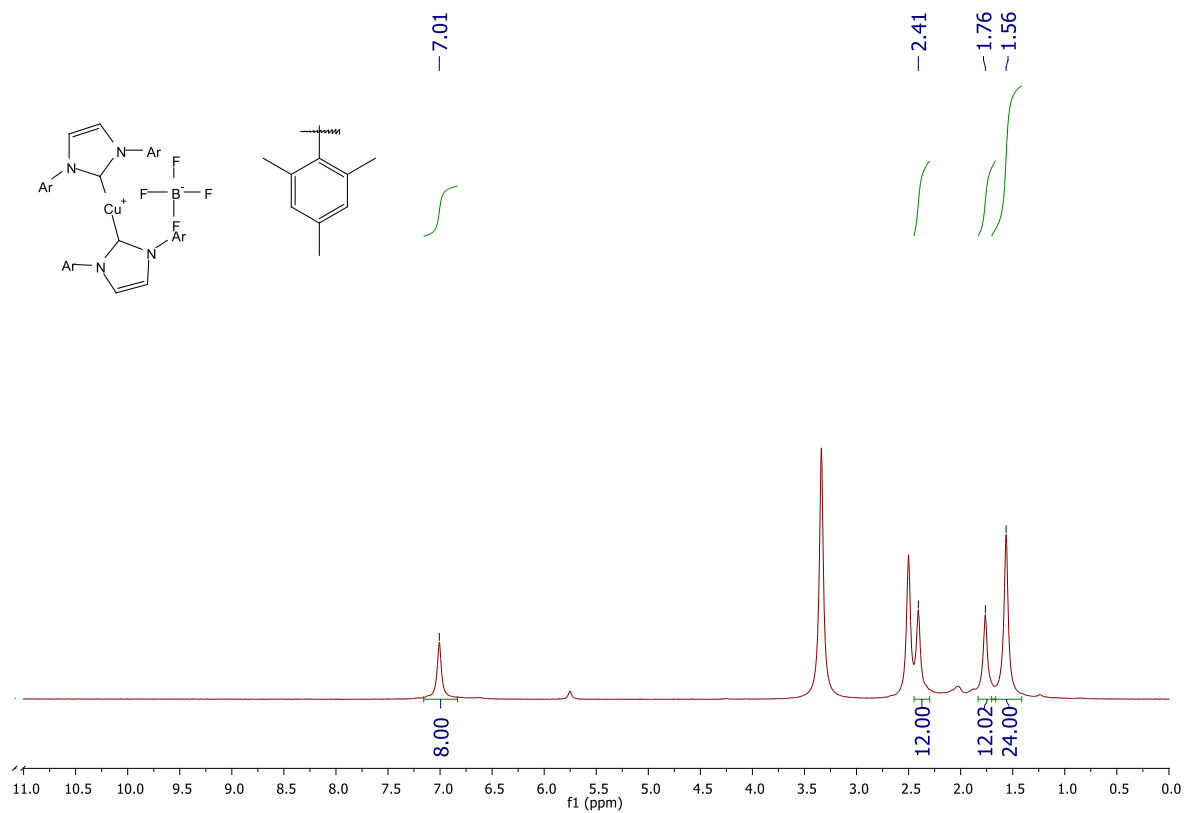

<sup>13</sup>C NMR (101 MHz, DMSO-*d*<sub>6</sub>)

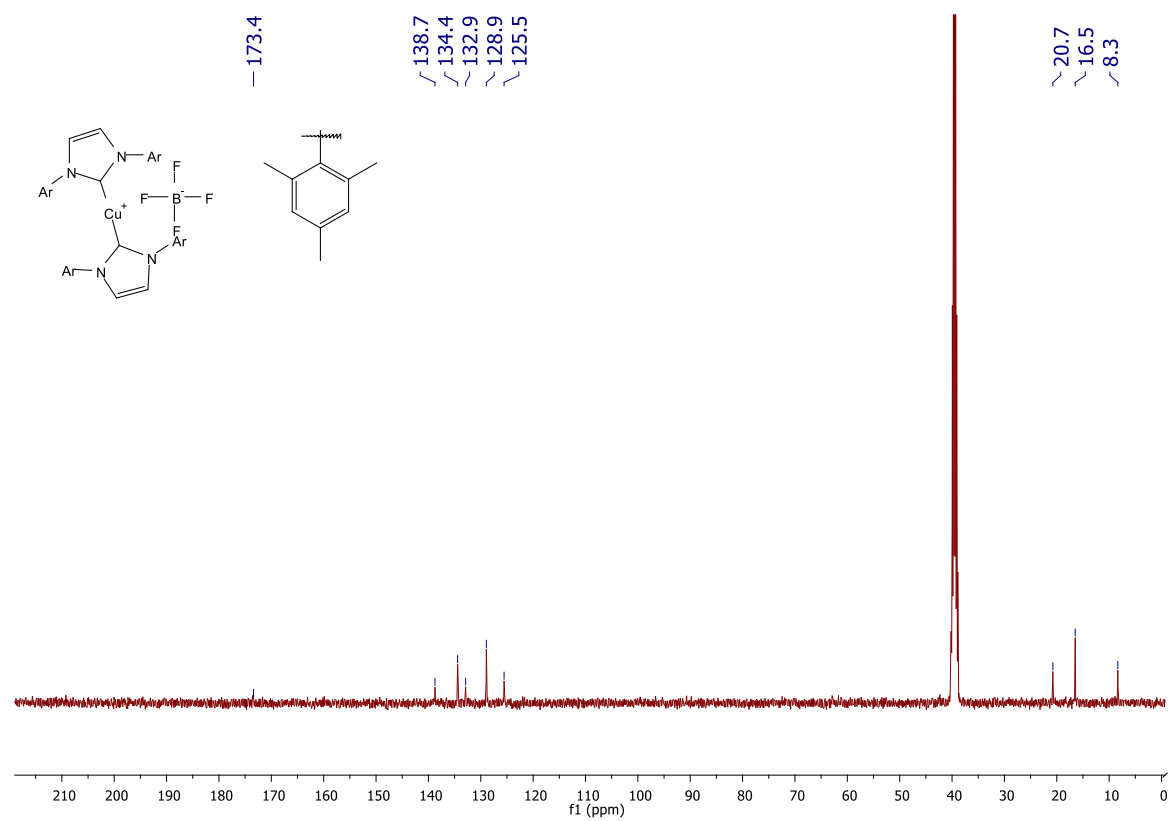

$^{19}\text{F}$  NMR (376 MHz,  $\text{DMSO-}d_6$ )

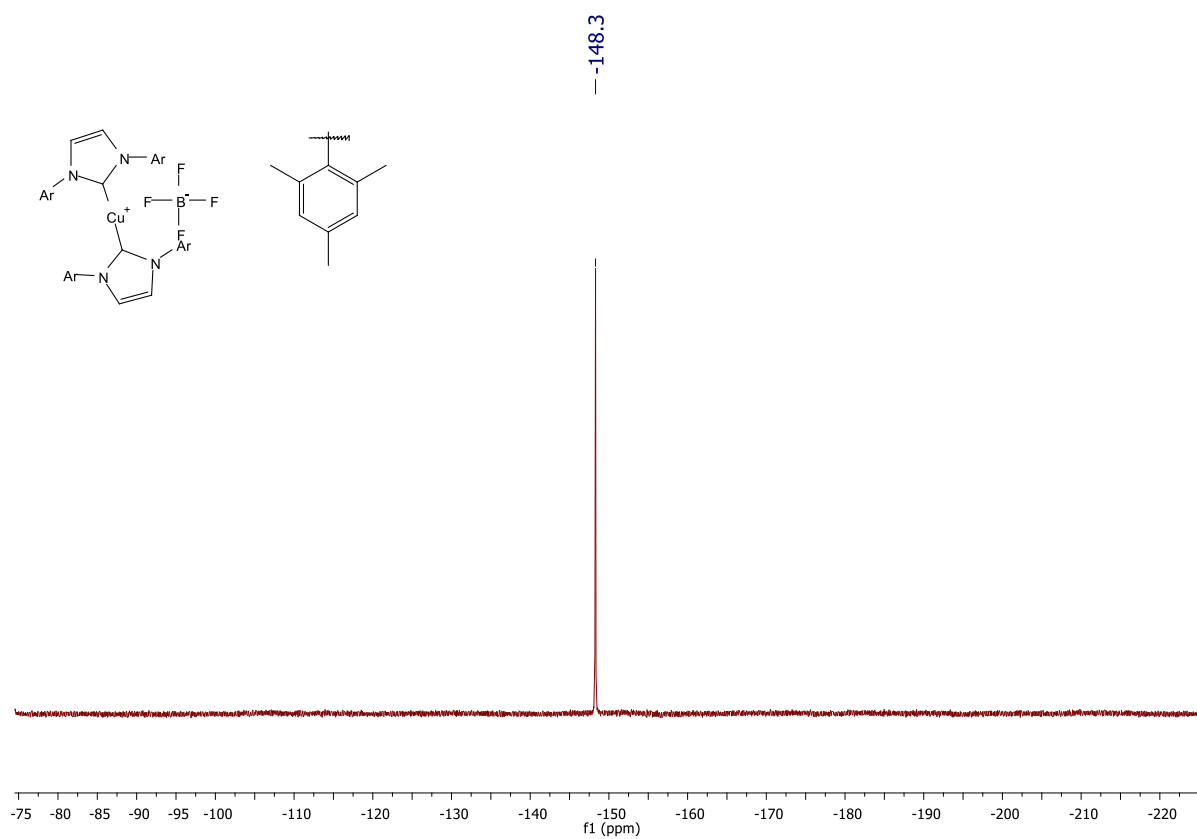



**Bis[(1,3-bis(2,4,6-trimethylphenyl)-4,5-dimethylimidazol-2-ylidene)copper hexafluorophosphate**  
**[Cu(IMes<sup>Me</sup>)<sub>2</sub>]PF<sub>6</sub>**

<sup>1</sup>H NMR (400MHz, DMSO-*d*<sub>6</sub>)

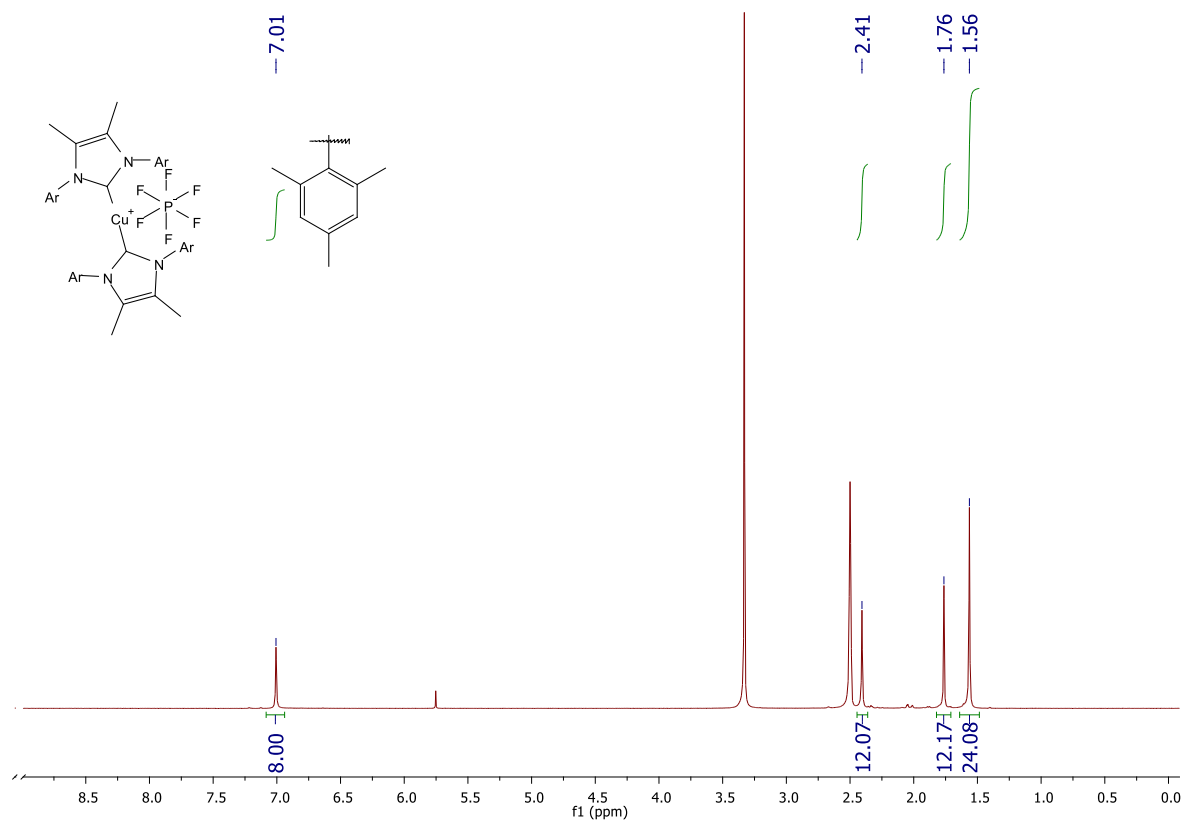

<sup>13</sup>C NMR (101 MHz, DMSO-*d*<sub>6</sub>)

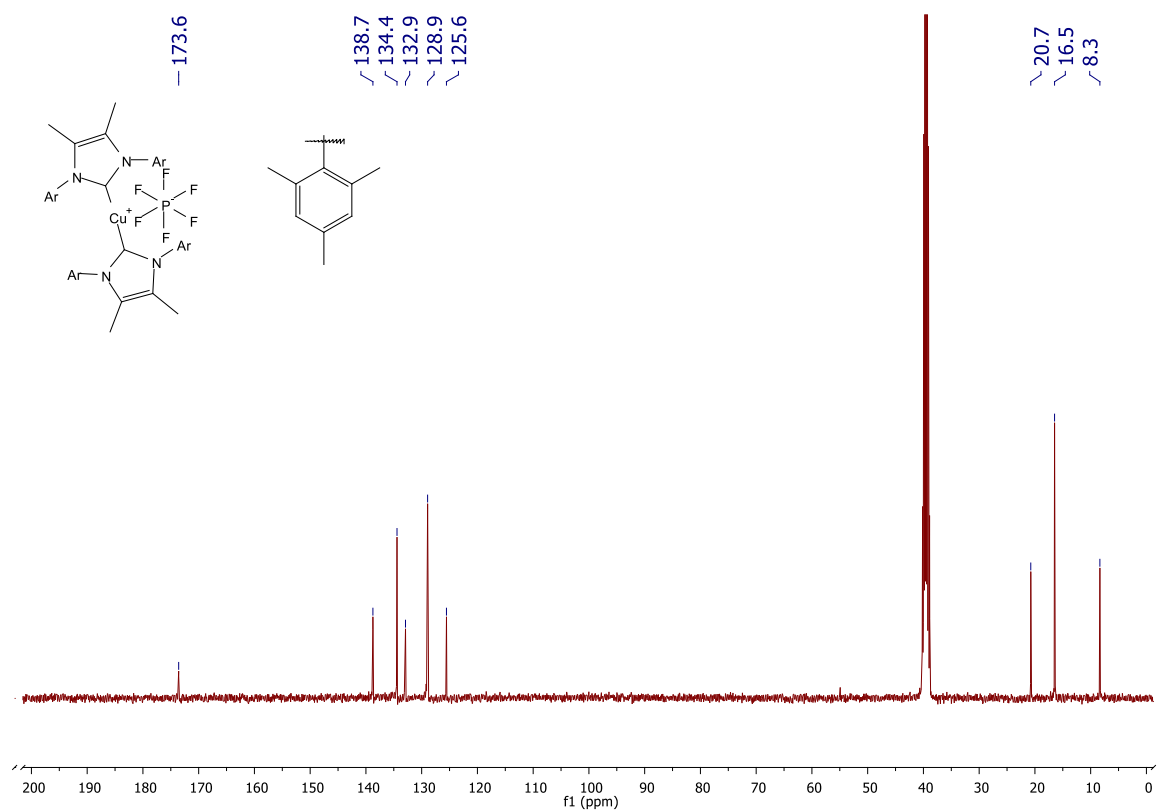

$^{31}\text{P}$  NMR (162 MHz,  $\text{DMSO-}d_6$ )

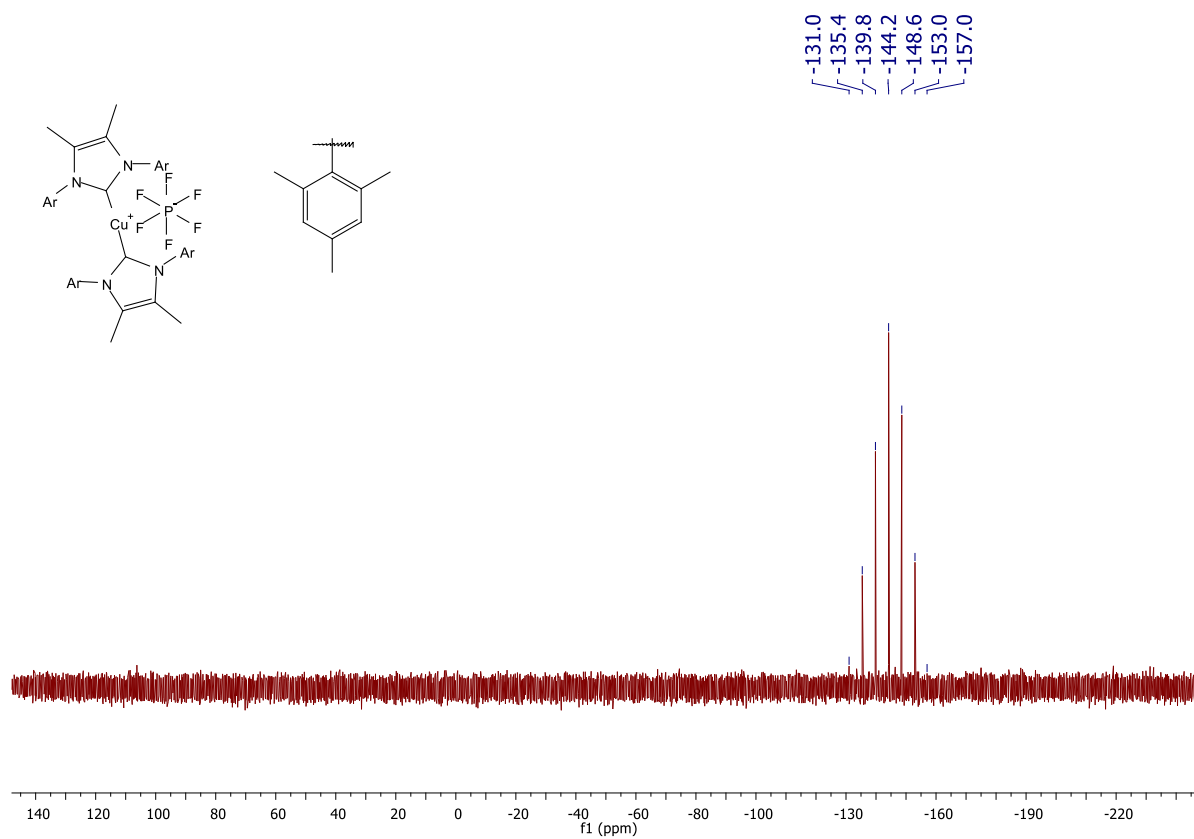

$^{19}\text{F}$  NMR (376 MHz,  $\text{DMSO-}d_6$ )

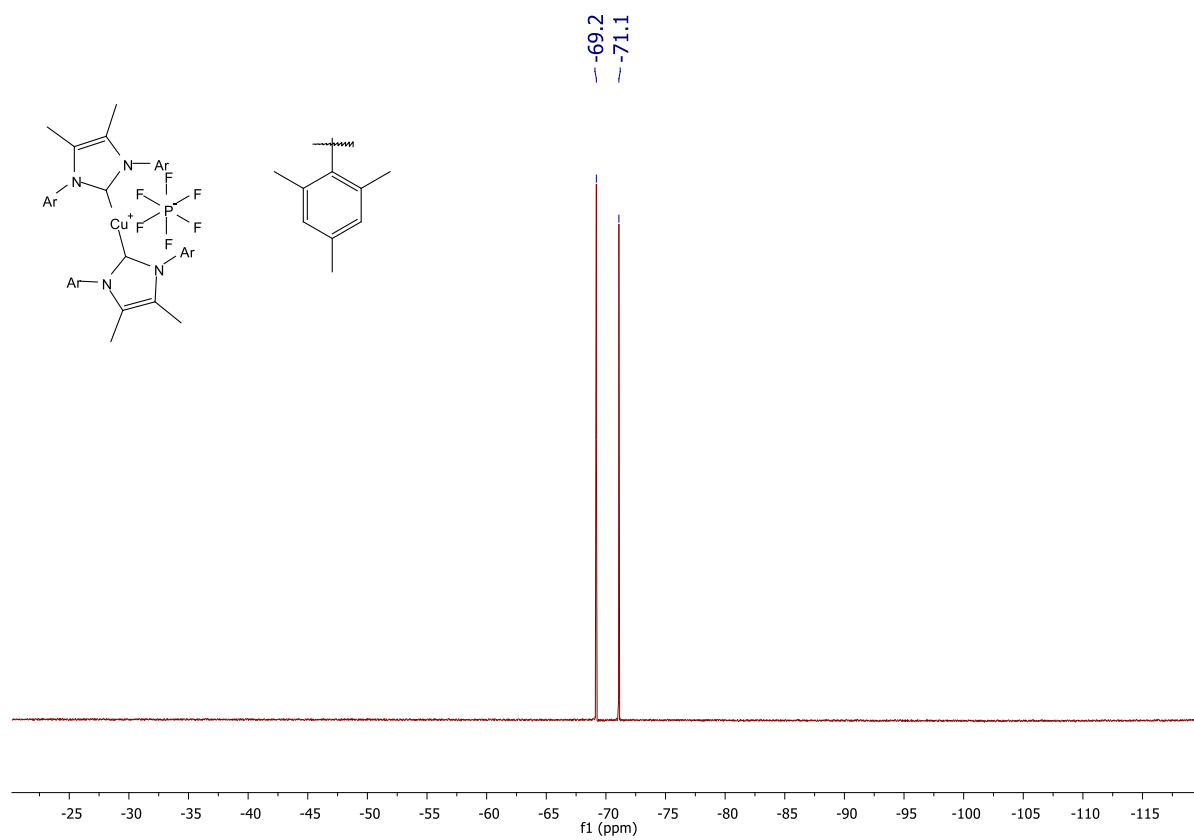

**Bis[(1,3-bis(2,6-diisopropylphenyl)-4,5-dimethyl)imidazol-2-ylidene]copper**  
**[Cu(IPr<sup>Me</sup>)<sub>2</sub>]BF<sub>4</sub>**

**tetrafluoroborate**

<sup>1</sup>H NMR (400MHz, DMSO-*d*<sub>6</sub>)

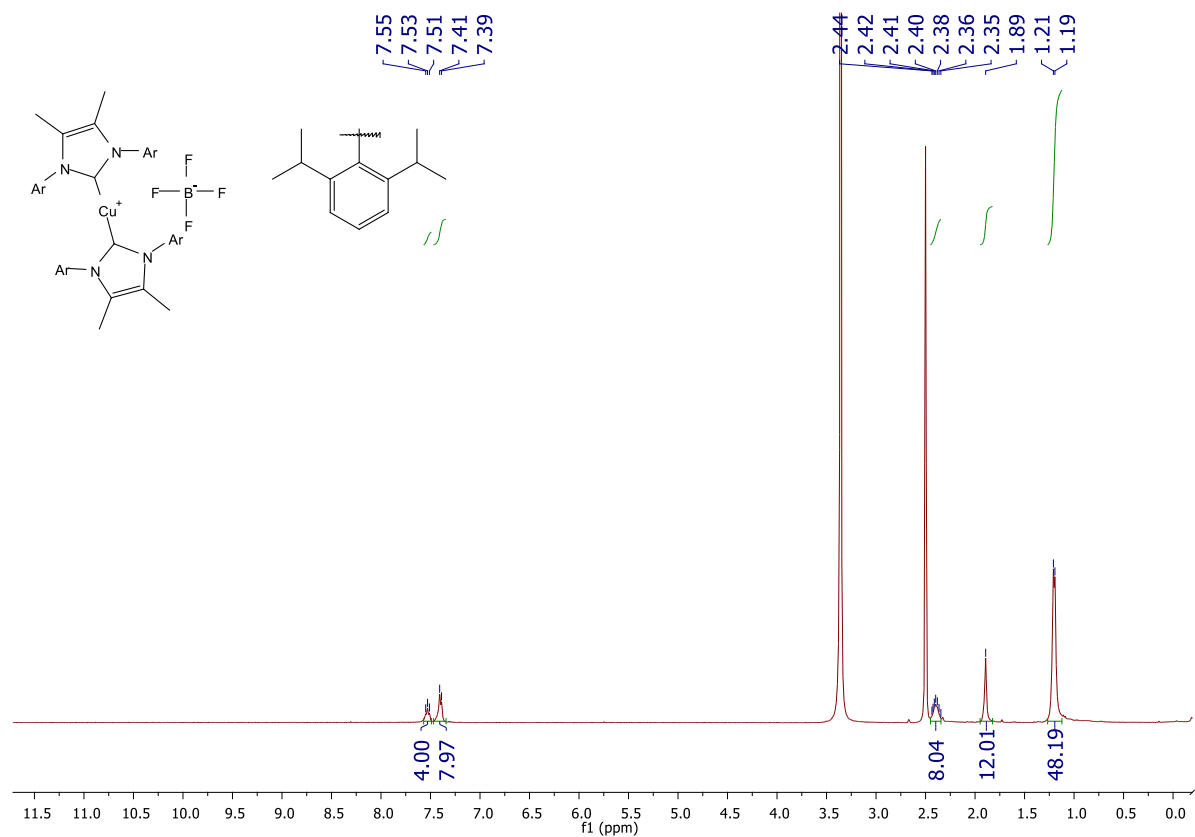

<sup>13</sup>C NMR (101 MHz, DMSO-*d*<sub>6</sub>)

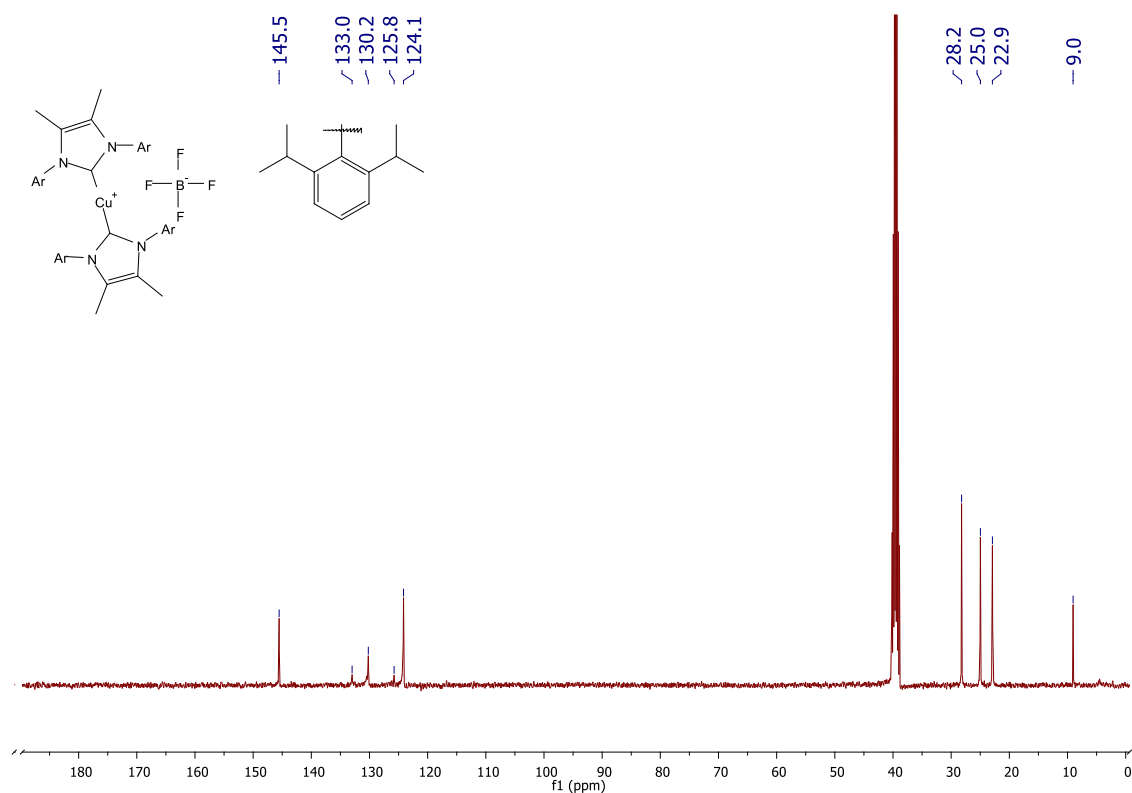

$^{19}\text{F}$  NMR (376 MHz,  $\text{DMSO-}d_6$ )

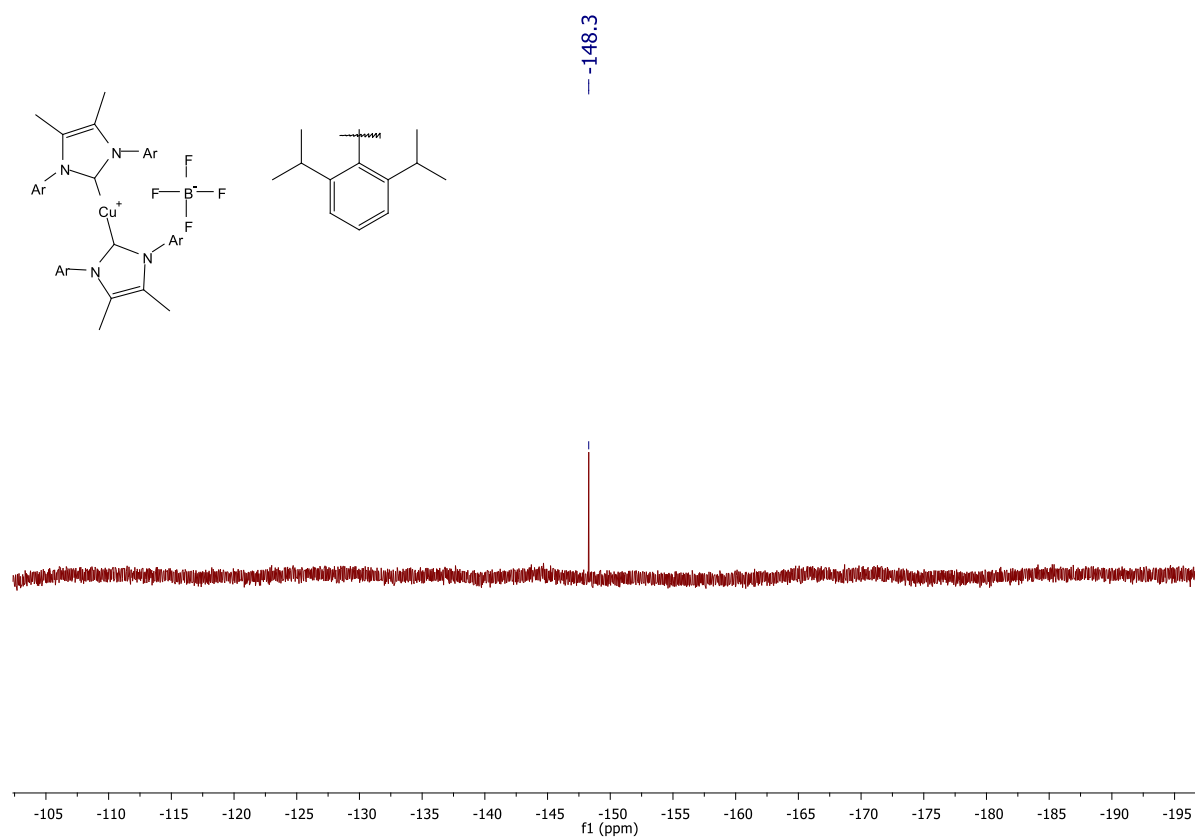

**Bis[(1,3-bis(2,6-diisopropylphenyl)-4,5-dimethyl)imidazol-2-ylidene]copper hexafluorophosphate**  
**[Cu(IPr<sup>Me</sup>)<sub>2</sub>]PF<sub>6</sub>**

<sup>1</sup>H NMR (400MHz, DMSO-*d*<sub>6</sub>)

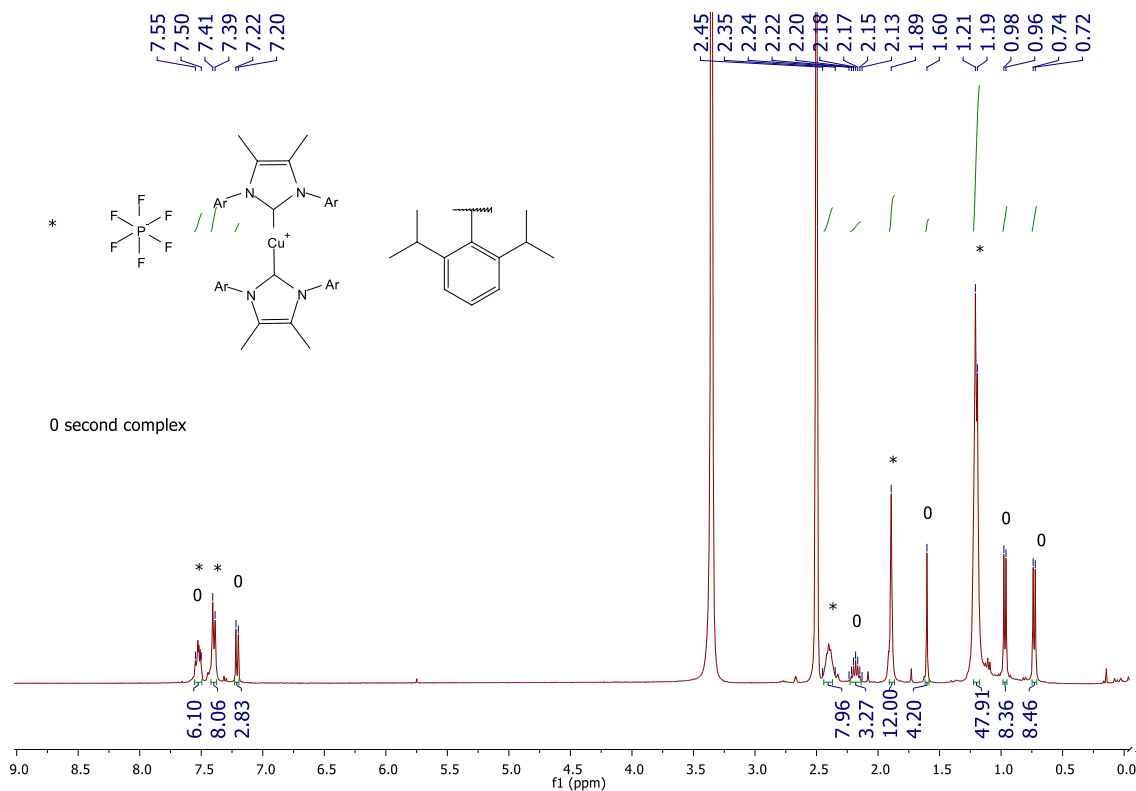

<sup>13</sup>C NMR (101 MHz, DMSO-*d*<sub>6</sub>)

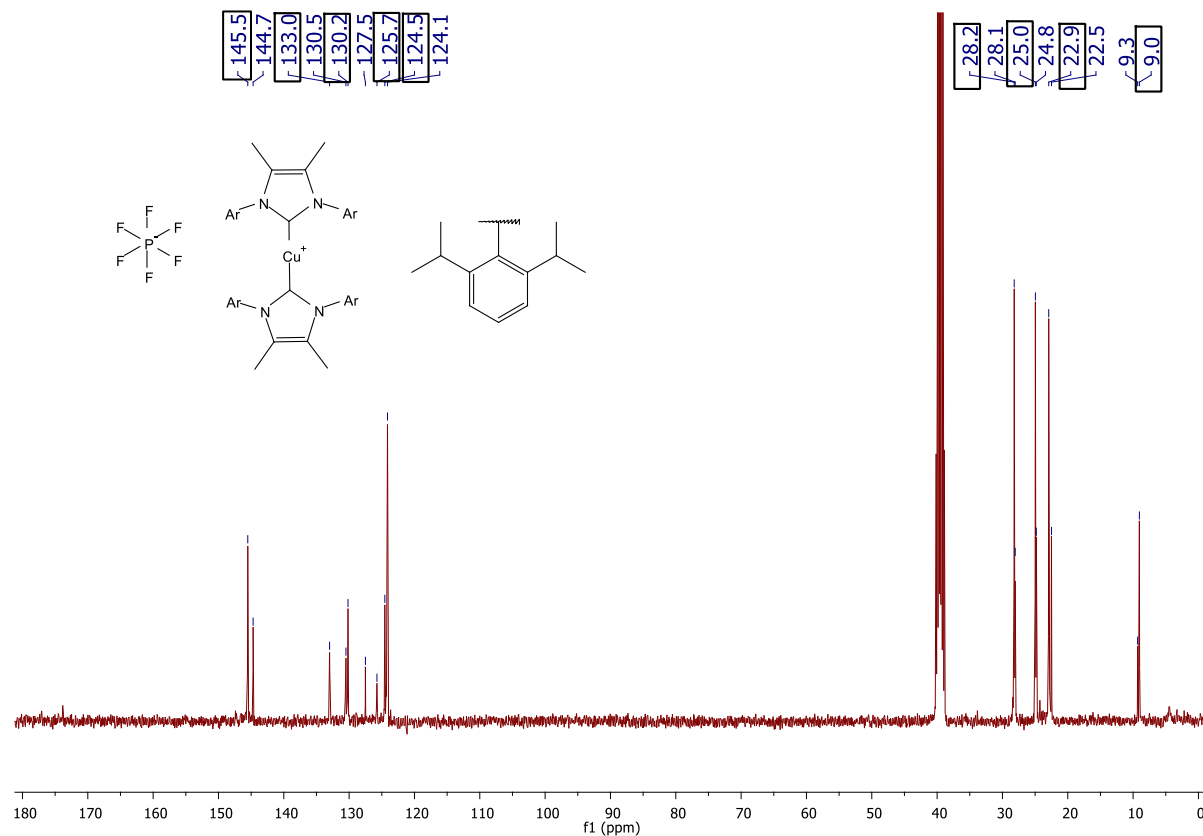

$^{31}\text{P}$  NMR (162 MHz,  $\text{DMSO-}d_6$ )

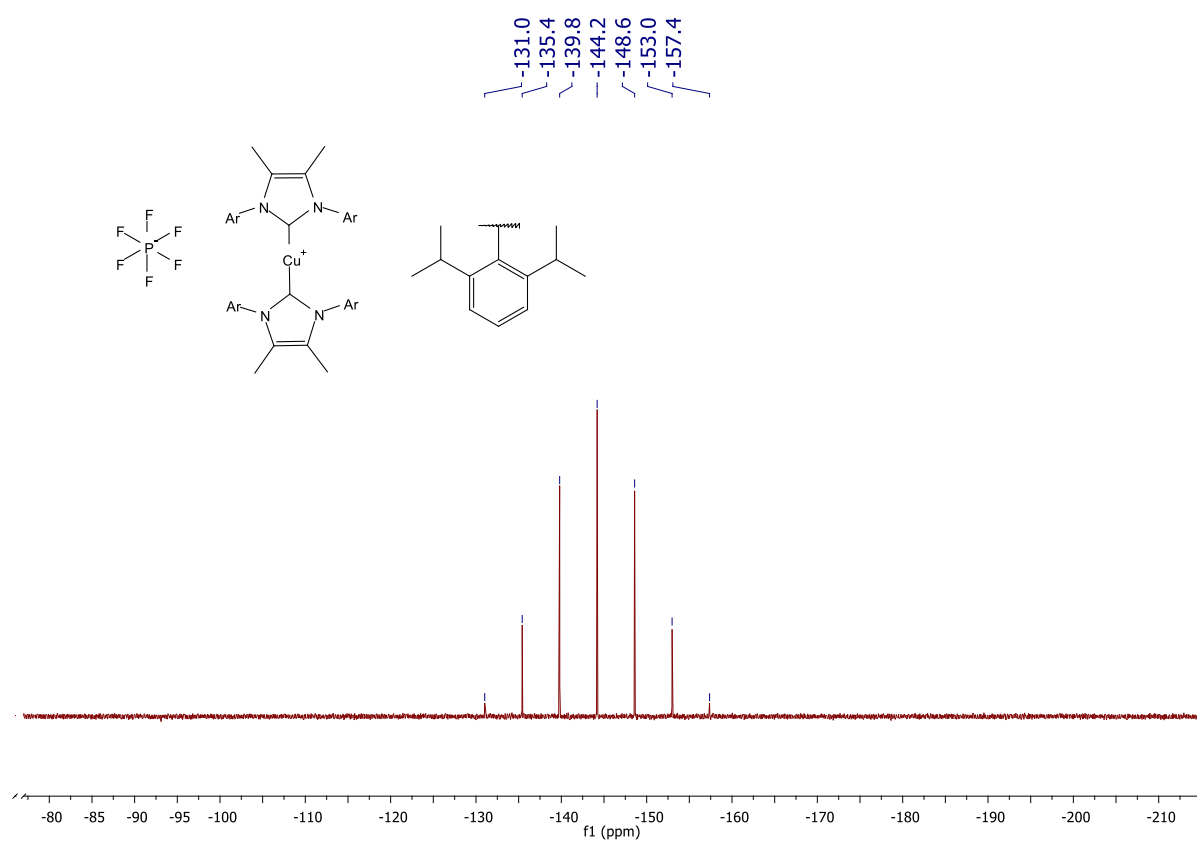

$^{19}\text{F}$  NMR (376 MHz,  $\text{DMSO-}d_6$ )

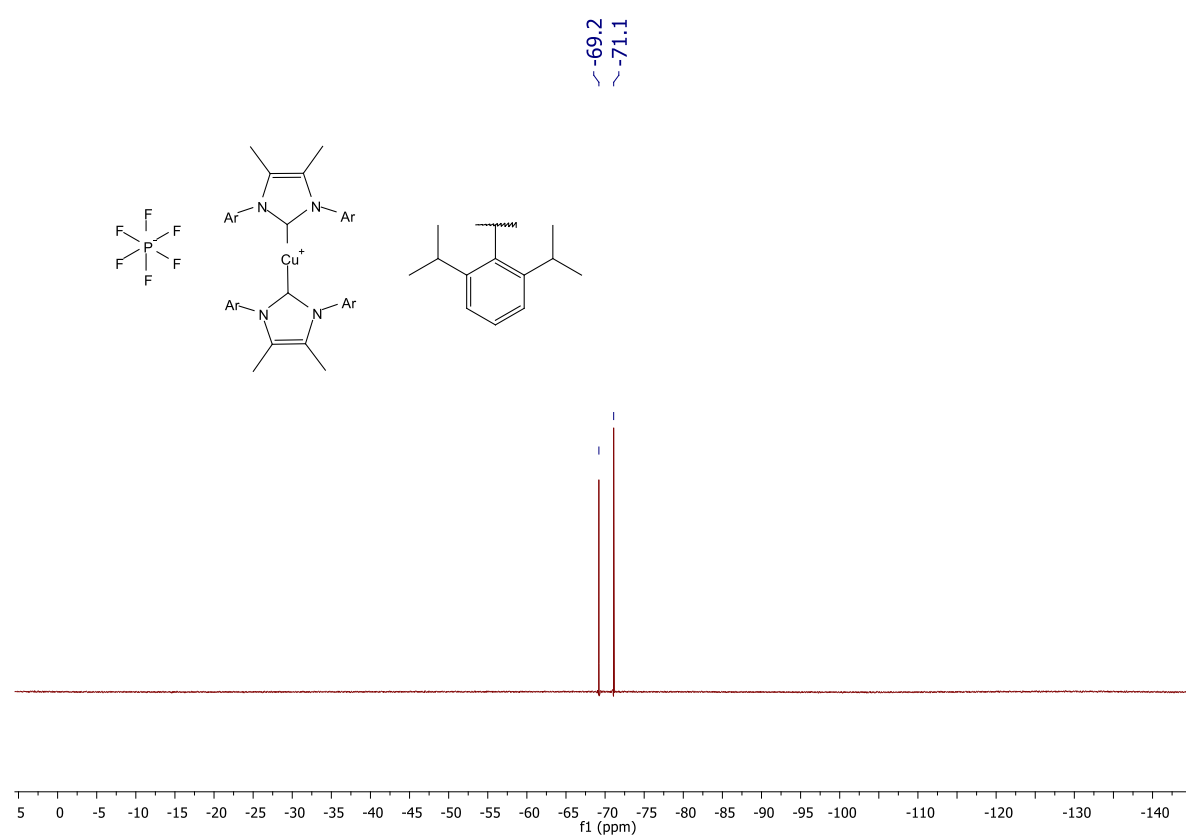

## 5. References

- [1] X. Bantreil, S. P. Nolan, *Nat. Protocols* **2011**, 6, 69.
- [2] J. E. Thomson, C. D. Campbell, C. Concellón, N. Duguet, K. Rix, A. M. Z. Slawin, A. D. Smith, *J. Org. Chem.* **2008**, 73, 2784.
- [3] D. M. Lindsay, D. McArthur, *Chem. Commun.* **2010**, 46, 2474.
- [4] C. Huerta-Aguilar, J. M. Talamantes Gómez, P. Thangarasu, I. Camacho-Arroyo, A. González-Arenas, J. Narayanan, R. Srivastava, *Appl. Organomet. Chem.* **2013**, 27, 578.
- [5] S. Wei, X.-G. Wei, X. Su, J. You, Y. Ren, *Chem. Eur. J.* **2011**, 17, 5965.
- [6] S. P. Roche, M.-L. Teyssot, A. Gautier, *Tetrahedron Lett.* **2010**, 51, 1265.
- [7] K. M. Kuhn, R. H. Grubbs, *Org. Lett.* **2008**, 10, 2075.
- [8] H. A. Zhong, J. A. Labinger, J. E. Bercaw, *J. Am. Chem. Soc.* **2002**, 124, 1378.
- [9] K. Hirano, S. Urban, C. Wang, F. Glorius, *Org. Lett.* **2009**, 11, 1019.
- [10] H. Clavier, A. Correa, L. Cavallo, E. C. Escudero-Adán, J. Benet-Buchholz, A. M. Z. Slawin, S. P. Nolan, *Eur. J. Inorg. Chem.* **2009**, 2009, 1767.
- [11] S. Gaillard, X. Bantreil, A. M. Z. Slawin, S. P. Nolan, *Dalton Trans.* **2009**, 6967.
- [12] B. Liu, X. Ma, F. Wu, W. Chen, *Dalton Trans.* **2015**, 44, 1836.
- [13] C. Gibard, H. Ibrahim, A. Gautier, F. Cisnetti, *Organometallics* **2013**, 32, 4279.
- [14] K. Semba, T. Fujihara, T. Xu, J. Terao, Y. Tsuji, *Adv. Synth. Catal.* **2012**, 354, 1542.
- [15] S. Díez-González, N. M. Scott, S. P. Nolan, *Organometallics* **2006**, 25, 2355.
